# Supplementary material for: Polyhaloalkanes as the C1 source: radical-mediated migratory carbonylation of alkenes with polyhaloalkanes toward α,β-unsaturated carbonyls
Source: Royal Society of Chemistry journal article supplement (doi:10.1039/d3qo01100c), 2023-01-01
Supplement: d3qo01100c1.pdf [file d3qo01100c1.pdf]

## Supplementary Information

### **Polyhaloalkanes as the C1 Source: Radical-Mediated Migratory Carbonylation of Alkenes with Polyhaloalkanes toward $\alpha,\beta$ -Unsaturated Carbonyls**

Tian-Bao Zhang, Yong Yao, Jing-Hao, Qin, Qing Sun, Aimin Li, Qing He,\* Jin-Heng Li\*  
and Xuan-Hui Ouyang\*

Key Laboratory of Jiangxi Province for Persistent Pollutants Control and Resources Recycle,  
Nanchang Hangkong University, Nanchang 330063, China;

State Key Laboratory Base of Eco-Chemical Engineering, College of Chemical Engineering,  
Qingdao University of Science and Technology, Qingdao 266042, China

State Key Laboratory of Chemo/Biosensing and Chemometrics, College of Chemistry and  
Chemical Engineering, Hunan University, Changsha 410082, China,

School of Chemistry and Chemical Engineering, Henan Normal University, Kaifeng, Henan,  
453007, China;

E-mail: [heqing85@hnu.edu.cn](mailto:heqing85@hnu.edu.cn), [jhli@hnu.edu.cn](mailto:jhli@hnu.edu.cn), [xuanhuiouyang@163.com](mailto:xuanhuiouyang@163.com),

#### **List of Contents**

|                                                         |                |
|---------------------------------------------------------|----------------|
| <b>(A) Typical experimental procedure</b>               | <b>S2-S3</b>   |
| <b>(B) General procedure for the starting materials</b> | <b>S4-S7</b>   |
| <b>(C) Mechanistic Studies</b>                          | <b>S8-24</b>   |
| <b>(D) Analytical data</b>                              | <b>S26-S42</b> |
| <b>(E) Spectra</b>                                      | <b>S43-90</b>  |
| <b>(F) References</b>                                   | <b>S91-93</b>  |

## (A) Typical experimental procedure

### (a) General

The  $^1\text{H}$  NMR,  $^{13}\text{C}$  NMR and  $^{19}\text{F}$  NMR spectra were recorded on a Bruker 500 (500, 125, and 471 MHz) advance spectrometer at room temperature in  $\text{CDCl}_3$  (solvent signals,  $\delta$  7.26 and 77.0 ppm) using TMS as internal standard. Low-resolution mass spectra (LRMS) data were measured on GCMS-QP2010 Ultra. High-resolution mass spectra (HRMS) was recorded on an electrospray ionization (ESI) apparatus using time-of-flight (TOF) mass spectrometry. Unless otherwise noted, all reactions were carried out using standard Schlenk techniques, and all starting materials and solvents were commercially available and were used without further purification. Column chromatography was performed on silica gel (300-400 mesh) using petroleum ether (PE)/ethyl acetate (EA).

### (b) General procedure for the synthesis of $\alpha,\beta$ -unsaturated esters **4**.

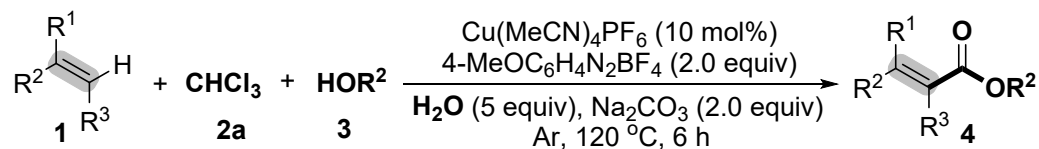

To a Schlenk tube were added  $\text{Cu}(\text{MeCN})_4\text{PF}_6$  (10 mol%), 4-MeOC<sub>6</sub>H<sub>4</sub>N<sub>2</sub>BF<sub>4</sub> (0.4 mmol, 2 equiv), Na<sub>2</sub>CO<sub>3</sub> (0.4 mmol, 2 equiv), alkene **1** (0.2 mmol), alcohol **3** (0.6 mmol), H<sub>2</sub>O (5equiv, 18 mg),  $\text{CHCl}_3$  **2a** (2 mL), the tube was then charged with argon. The mixture was stirred at 120 °C (oil bath) until complete consumption of starting material as monitored by TLC and/or GC-MS analysis (about 6 h). After the reaction was finished, the combined organic phases concentrated, and the resulting residue was purified by silica gel column chromatography (petroleum/ethyl acetate) to afford the desired product **4**.

(c) General procedure for the synthesis of  $\alpha,\beta$ -unsaturated aldehydes **5**

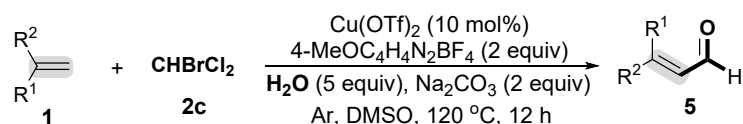

To a Schlenk tube were added  $\text{Cu}(\text{OTf})_2$  (10 mol%), 4-MeOC<sub>6</sub>H<sub>4</sub>N<sub>2</sub>BF<sub>4</sub> (0.4 mmol, 2 equiv), Na<sub>2</sub>CO<sub>3</sub> (0.4 mmol, 2 equiv), alkenes **1** (0.2 mmol), CHBrCl<sub>2</sub> **2c** (0.6 mmol, 3 equiv), H<sub>2</sub>O (1 mmol), DMSO (2 mL), the tube was then charged with argon. The mixture was stirred at 120 °C (oil bath) until complete consumption of starting material as monitored by TLC and/or GC-MS analysis (about 12 h). After the reaction was finished, the combined organic phases concentrated, and the resulting residue was purified by silica gel column chromatography (petroleum/ethyl acetate) to afford the desired product **5**.

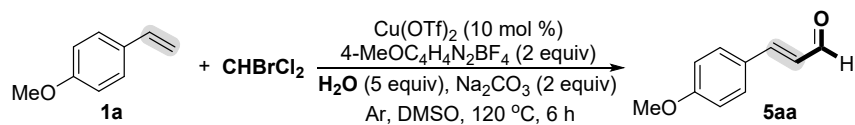

| Entry | Variation from the Standard Conditions                                    | <b>5aa</b> |
|-------|---------------------------------------------------------------------------|------------|
| 1     | None                                                                      | 64         |
| 2     | CuCl                                                                      | 51         |
| 3     | FeCl <sub>2</sub>                                                         | 43         |
| 4     | Cu(MeCN) <sub>4</sub> PF <sub>4</sub>                                     | 52         |
| 5     | Cu(MeCN) <sub>4</sub> BF <sub>4</sub>                                     | 45         |
| 6     | Cu(acac) <sub>2</sub>                                                     | 40         |
| 7     | Without Na <sub>2</sub> CO <sub>3</sub>                                   | NR         |
| 8     | Without 4-MeOC <sub>6</sub> H <sub>4</sub> N <sub>2</sub> BF <sub>4</sub> | NR         |
| 9     | K <sub>3</sub> PO <sub>4</sub> instead of Na <sub>2</sub> CO <sub>3</sub> | 43         |
| 10    | NaHCO <sub>3</sub> instead of Na <sub>2</sub> CO <sub>3</sub>             | trace      |
| 11    | NaOH instead of Na <sub>2</sub> CO <sub>3</sub>                           | 33         |
| 12    | EA instead of DMSO                                                        | NR         |
| 13    | MeCN instead of DMSO                                                      | NR         |
| 14    | DMA instead of DMSO                                                       | NR         |
| 15    | 1,4-dioxane instead of DMSO                                               | NR         |
| 16    | PhCF <sub>3</sub> instead of DMSO                                         | NR         |
| 17    | DMSO:H <sub>2</sub> O = 1:1                                               | trace      |

[a] Reaction conditions: **1a** (0.2 mmol), CBrHCl<sub>2</sub> **2c** (0.6 mmol), Cu(OTf)<sub>2</sub> (0.02 mmol), Na<sub>2</sub>CO<sub>3</sub> (0.4 mmol), 4-MeOC<sub>6</sub>H<sub>4</sub>N<sub>2</sub>BF<sub>4</sub> (0.4 mmol), H<sub>2</sub>O (1 mmol), at 120 °C under argon atmosphere for 12 h.

**Table S1. Screening of optimal reaction conditions for  $\alpha,\beta$ -unsaturated aldehydes **5**.**

## (B) General procedure for the synthesis of the starting materials

The common alkene, polyhaloalkane and alcohol substrates were commercially available. The synthesis of the substrate **1x**, **1y**, **1w** and **1z** was described as follows:

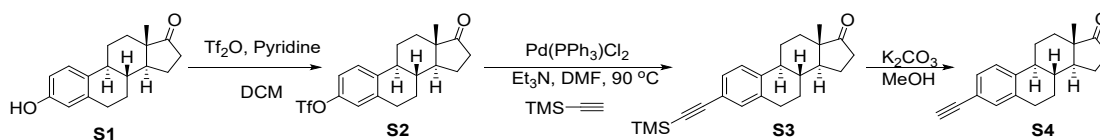

### Synthesis of **S2**<sup>1</sup>

3-(Trifluoromethanesulfonyl)estrone (**S2**) was synthesized according to the reported procedure. Under nitrogen atmosphere, to a 50 mL flamed dried round bottom charged with **S1** (2700 mg, 10.0 mmol, 1.0 equiv) was added DCM (30.0 mL) and pyridine (1580 mg, 1.60 mL, 20.0 mmol, 2.0 equiv). The resulting mixture was cooled to 0°C in an ice/water bath. Tf<sub>2</sub>O (3390 mg, 2.10 mL, 15.0 mmol, 1.5 equiv) was added dropwise over ca. 5 minutes. The reaction mixture was warmed to room temperature and stirred for 5 hours. The resulting brown reaction was then quenched by water (15 mL). The layers were separated, and the aqueous layer was extracted with DCM (3 × 20 mL). The organic layers were combined, dried over Na<sub>2</sub>SO<sub>4</sub>, filtered, and concentrated in vacuo. The residue was purified by flash column chromatography on silica gel, to afford the **S2** as a white solid.

### Synthesis of **S3**<sup>1</sup>

A mixture of **S2** (1610 mg, 4.0 mmol, 1.00 equiv), ethynyltrimethylsilane (0.85 mL, 6.0 mmol, 1.5 equiv), Et<sub>3</sub>N (3.0 mL), and Pd(PPh<sub>3</sub>)<sub>2</sub>Cl<sub>2</sub> (84 mg, 0.12 mmol, 0.03 equiv) in 15 mL DMF was stirred at 90 °C for 4 h under nitrogen. The reaction mixture was then diluted with water, extracted with 1:1 petroleum ether/ether, washed with water until neutral, and dried (Na<sub>2</sub>SO<sub>4</sub>), after filtration the filtrate was evaporated. Chromatography of the residue on silica gel provided the corresponding product **S3**.

### Synthesis of **S4**<sup>1</sup>

To **S3** (1160 mg, 3.30 mmol, 1.00 equiv) a solution of K<sub>2</sub>CO<sub>3</sub> (520 mg, 4.95 mmol,

1.5equiv) in 10 mL MeOH was added and the mixture was stirred at room temperature, until TLC analysis showed that S3 was completely consumed. The reaction mixture was filtered through a short plug of silica gel. The filtration was concentrated and then purified by flash chromatography to give the corresponding product S4.

### Synthesis of 1x and 1y<sup>2</sup>

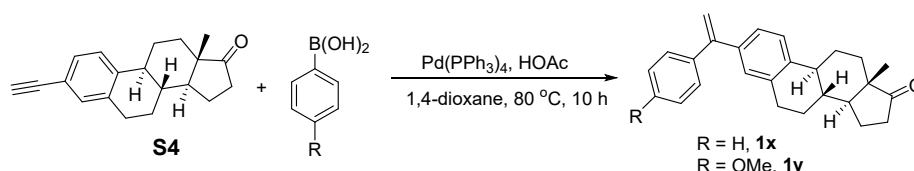

Under nitrogen atmosphere, to a 25 mL flamed dried round bottom charged with S4 (278 mg, 1 mmol, 1.0 equiv), Arylboronic acid (2.0 mmol, 2.0 equiv), and Pd(PPh<sub>3</sub>)<sub>4</sub> (33 mg, 0.03 mmol, 0.03 equiv) was added 1,4-dioxane (8.0 mL) and HOAc (0.10-0.15 equiv), then stirred at 80 °C for 10 h. The reaction mixture was then diluted with water, and the aqueous layer was extracted with ethyl acetate (3 × 10 mL). The organic layers were combined, dried over Na<sub>2</sub>SO<sub>4</sub>, filtered, and concentrated in vacuo. Chromatography of the residue on silica gel provided the corresponding product 1x and 1y.

### Synthesis of 1w<sup>1,3</sup>

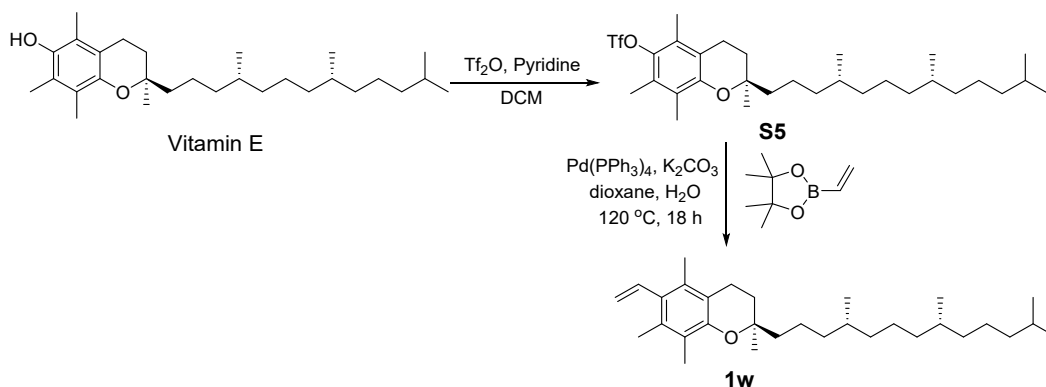

Under nitrogen atmosphere, to a 50 mL flamed dried round bottom charged with Vitamin E (4300 mg, 10.0 mmol, 1.0 equiv) was added DCM (30.0 mL) and pyridine (1580 mg, 1.6 mL, 20.0 mmol, 2.0 equiv). The resulting mixture was cooled to 0°C in an ice/water bath. Tf<sub>2</sub>O (3390 mg, 2.1 mL, 15.0 mmol, 1.5 equiv) was added dropwise

over ca. 5 minutes. The reaction mixture was warmed to room temperature and stirred for 5 hours. The resulting reaction was then quenched by water (15 mL). The layers were separated, and the aqueous layer was extracted with DCM (3×20 mL). The organic layers were combined, dried over Na<sub>2</sub>SO<sub>4</sub>, filtered, and concentrated in vacuo. The residue was purified by flash column chromatography on silica gel, to afford the **S5**.

Under nitrogen atmosphere, to a 25 mL flamed dried round bottom charged with **S5** (562 mg, 1 mmol, 1.0 equiv), 4,4,5,5-tetramethyl-2-vinyl-1,3,2-dioxaborolane (308 mg, 2.0 mmol, 2.0 equiv), Pd(PPh<sub>3</sub>)<sub>4</sub> (139 mg, 0.12 mmol, 0.12 equiv), and K<sub>2</sub>CO<sub>3</sub>(414 mg, 3 mmol, 3equiv), was added dioxane-water (4:1) mixture at 120 °C for 18 h. The reaction mixture was then diluted with water, and the aqueous layer was extracted with ethyl acetate (3×10 mL). The organic layers were combined, dried over Na<sub>2</sub>SO<sub>4</sub>, filtered, and concentrated in vacuo. Chromatography of the residue on silica gel provided the corresponding product **1w**.

### Synthesis of **S6**<sup>1</sup>

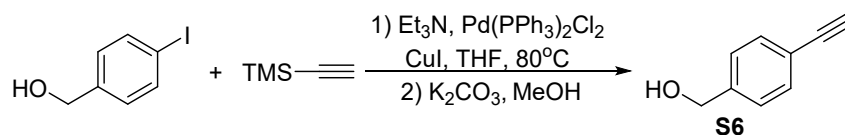

A mixture of (4-iodophenyl)methanol (2400 mg, 10.0 mmol, 1.0 equiv), ethynyltrimethylsilane (2.2 mL, 15.0 mmol, 1.5 equiv), triethylamine (7.5 mL), CuI (190 mg, 1 mmol, 0.1 equiv), and Pd(PPh<sub>3</sub>)<sub>2</sub>Cl<sub>2</sub> (210 mg, 0.30 mmol, 0.03 equiv) in 30 mL THF was stirred at 80 °C for 10 h under nitrogen. The reaction mixture was then diluted with water, extracted with 1:1 petroleum ether/ether, washed with water until neutral, and dried (Na<sub>2</sub>SO<sub>4</sub>), after filtration the filtrate was evaporated. Chromatography of the residue on silica gel provided the corresponding product (4-((trimethylsilyl)ethynyl)phenyl)methanol.

To (4-((trimethylsilyl)ethynyl)phenyl)methanol (2041 mg, 10.0 mmol, 1.0 equiv) a solution of K<sub>2</sub>CO<sub>3</sub> (2070 mg, 15.0 mmol, 1.5 equiv) in 30 mL MeOH was added and the mixture was stirred at room temperature, until TLC analysis showed that L2 was

completely consumed. The reaction mixture was filtered through a short plug of silica gel. The filtration was concentrated and then purified by flash chromatography to give the corresponding product **S6**.

### Synthesis of **S7**<sup>2</sup>

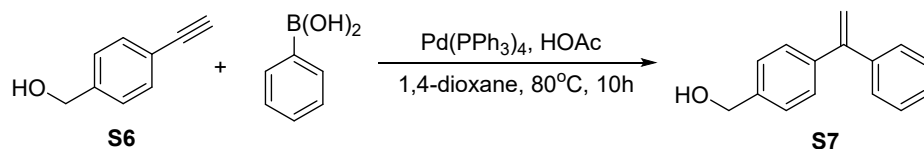

Under nitrogen atmosphere, to a 50 mL flamed dried round bottom charged with **S6** (660 mg, 5.0 mmol, 1.0 equiv), phenylboronic acid (1220 mg, 10.0 mmol, 2.0 equiv), and  $\text{Pd(PPh}_3)_4$  (165 mg, 0.15 mmol, 0.03 equiv) was added 1,4-dioxane (20 mL) and HOAc (0.1-0.15 equiv), then stirred at  $80^\circ\text{C}$  for 10 h. The reaction mixture was then diluted with water, and the aqueous layer was extracted with ethyl acetate ( $3 \times 10$  mL). The organic layers were combined, dried over  $\text{Na}_2\text{SO}_4$ , filtered, and concentrated in vacuo. Chromatography of the residue on silica gel provided the corresponding product **S7**.

### Synthesis of **1z**<sup>4</sup>

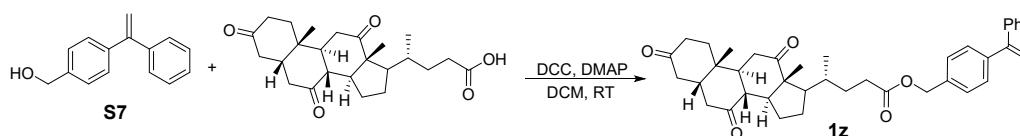

Under nitrogen atmosphere, a 25 mL flamed dried round bottom flask was charged with **S7** (210 mg, 1.0 mmol, 1.0 equiv), dehydrocholic acid (804 mg, 2.0 mmol, 1.5 equiv), DMAP (12.2 mg, 0.10 mmol, 10.0 mol%), DCC (412 mg, 2.0 mmol, 2.0 equiv), and DCM (8.0 mL). After the reaction mixture was then stirred at  $25^\circ\text{C}$  for 24 hours, it was concentrated in vacuo. The residue was purified by flash column chromatography on silica gel, to afford the compound **1z** as a white solid.

## (C) Mechanistic Studies

### (a) Isolation of 6b-D3.

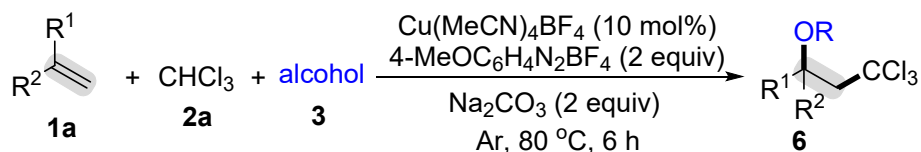

To a Schlenk tube were added substrates  $\text{Cu}(\text{MeCN})_4\text{BF}_6$  (10 mol%), 4- $\text{MeOC}_6\text{H}_4\text{N}_2\text{BF}_4$  (0.4 mmol, 2 equiv),  $\text{Na}_2\text{CO}_3$  (0.4 mmol, 2 equiv), alkene **1** (0.2 mmol),  $\text{CD}_3\text{OD}$  **3b-D4** (0.6 mmol),  $\text{CHCl}_3$  **2a** (2 mL), the tube was then charged with argon. The mixture was stirred at 80 °C until for 6 h. After the reaction was finished, the combined organic phases concentrated, and the resulting residue was purified by silica gel column chromatography (petroleum/ethyl acetate) to afford the desired product **6**.

### Methoxy-4-(3,3,3-trichloro-1-(methoxy-D3)propyl)benzene (**6b-D3**):

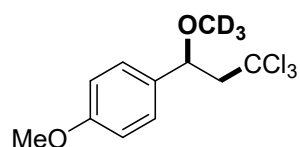

Reaction Time: 1.5 h, at 120 °C; Yield: 82%, Yellow oil;  $^1\text{H}$

NMR (500 MHz,  $\text{CDCl}_3$ )  $\delta$  7.27 (d,  $J = 8.5$  Hz, 2H), 6.91 (d,

$J = 8.5$  Hz, 2H), 4.56-4.54 (m, 1H), 3.82 (s, 3H), 3.29-3.24 (m, 1H), 2.99-2.96 (m,

1H);  $^{13}\text{C}$  NMR (125 MHz,  $\text{CDCl}_3$ )  $\delta$  159.5, 132.6, 127.9, 114.1, 97.4, 80.5, 62.1, 55.3,

55.2; LRMS (EI, 70eV)  $m/z$  (%): 287 ( $\text{M}^++2$ , 2), 285 ( $\text{M}^+$ , 2), 54 (100), 135 (20), 111

(4); HRMS  $m/z$  (ESI) calcd for  $\text{C}_{11}\text{H}_{11}\text{O}_2\text{D}_3\text{Cl}_3$  ( $[\text{M}+\text{H}]^+$ ) 286.0242, found 286.0239.



**(b) Transformation of olefin alkoxy polychloroalkylation product 6a.**

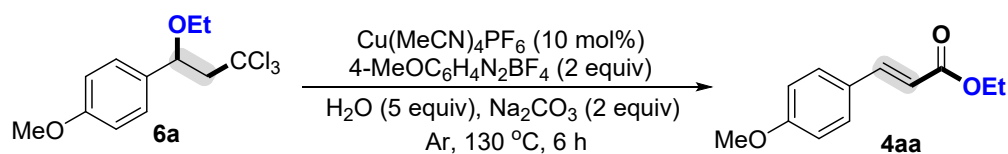

| Entry             | Variation from the Standard Conditions                                            | 4aa   |
|-------------------|-----------------------------------------------------------------------------------|-------|
| 1                 | None                                                                              | 36    |
| 2                 | Without Cu(MeCN) <sub>4</sub> PF <sub>6</sub>                                     | 33    |
| 3                 | Without 4-MeOC <sub>6</sub> H <sub>4</sub> N <sub>2</sub> BF <sub>4</sub>         | NR    |
| 4                 | Without Na <sub>2</sub> CO <sub>3</sub>                                           | 37    |
| 5                 | Without Na <sub>2</sub> CO <sub>3</sub> and Cu(MeCN) <sub>4</sub> PF <sub>6</sub> | 75    |
| 6 <sup>[b]</sup>  | PhCl instead of CHCl <sub>3</sub>                                                 | 36    |
| 7 <sup>[b]</sup>  | PhCF <sub>3</sub> instead of CHCl <sub>3</sub>                                    | 21    |
| 8 <sup>[b]</sup>  | DMF instead of CHCl <sub>3</sub>                                                  | trace |
| 9 <sup>[b]</sup>  | DMSO instead of CHCl <sub>3</sub>                                                 | trace |
| 10 <sup>[b]</sup> | DMA instead of CHCl <sub>3</sub>                                                  | trace |
| 11 <sup>[b]</sup> | MeCN instead of CHCl <sub>3</sub>                                                 | trace |
| 12 <sup>[b]</sup> | 130 °C                                                                            | 78    |

[a] Reaction conditions: **6a** (0.2 mmol), Cu(MeCN)<sub>4</sub>PF<sub>6</sub> (0.02 mmol), Na<sub>2</sub>CO<sub>3</sub> (0.4 mmol), 4-MeOC<sub>6</sub>H<sub>4</sub>N<sub>2</sub>BF<sub>4</sub> (0.4 mmol), and CHCl<sub>3</sub> (2 mL) at 120 °C under argon atmosphere for 6 h. [b] **6a** (0.2 mmol), 4-MeOC<sub>6</sub>H<sub>4</sub>N<sub>2</sub>BF<sub>4</sub> (0.4 mmol), and CHCl<sub>3</sub> (2 mL) at 120 °C under argon atmosphere for 6 h.

**Table S2. Transformation of 6a.**

**(c) Transformation of the intermediate 7a.**

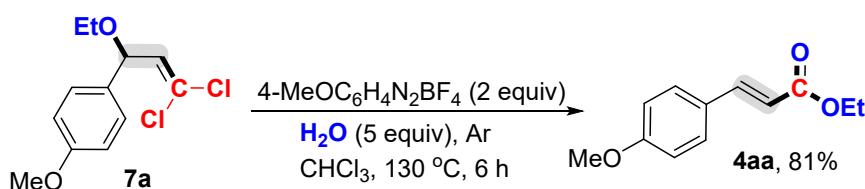

**1-(3,3-dichloro-1-ethoxyallyl)-4-methoxybenzene (7a)**

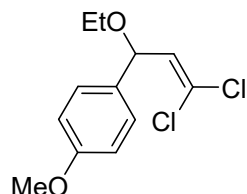

<sup>1</sup>H NMR (400 MHz, CDCl<sub>3</sub>) δ 7.28 (d, *J* = 8.4 Hz, 2H), 6.89 (d, *J* = 8.8 Hz, 2H), 6.06 (d, *J* = 8.8 Hz, 1H), 5.07 (d, *J* = 8.8 Hz, 1H), 3.80 (s, 3H), 3.57-3.43 (m, 2H), 1.23 (t, *J* = 6.8 Hz, 3H).<sup>13</sup>C

NMR (101 MHz, CDCl<sub>3</sub>) δ 159.46, 131.89, 131.20, 127.69, 122.53, 114.08, 78.27, 64.06, 55.29, 15.20. LRMS (EI, 70 eV) *m/z* (%): 262 (M<sup>+</sup>+2, 2), 260 (M<sup>+</sup>, 3), 225(100), 197 (49), 137 (16).

(d) Transformation of olefin alkoxy polychloroalkylation product **6b-D3**.

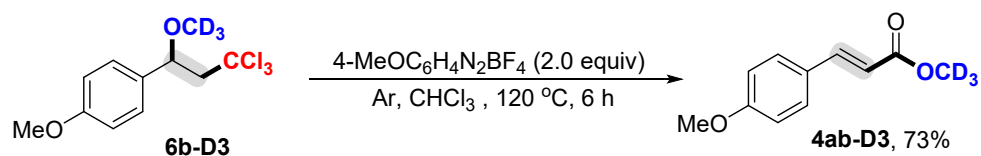

**1-Methyl-D3 (*E*)-3-(4-methoxyphenyl)acrylate (**4ab-D3**):**

Yield: 73%, Yellow oil;  $^1\text{H NMR}$  (500 MHz,  $\text{CDCl}_3$ )  $\delta$  7.65 (d,  $J = 16.0$  Hz, 1H), 7.48 (d,  $J = 8.5$  Hz, 2H), 6.91 (d,  $J = 8.5$  Hz, 2H), 6.31 (d,  $J = 16.0$  Hz, 1H), 3.84 (s, 3H);  $^{13}\text{C NMR}$  (125 MHz,  $\text{CDCl}_3$ )  $\delta$  167.8, 161.4, 144.5, 129.7, 127.1, 115.2, 114.3, 55.4; LRMS (EI, 70eV)  $m/z$  (%): 195 ( $\text{M}^+$ , 74), 161 (100), 133 (43), 89 (23); HRMS  $m/z$  (ESI) calcd for  $\text{C}_{11}\text{H}_{10}\text{O}_3\text{D}_3$  ( $[\text{M}+\text{H}]^+$ ) 196.1048, found 196.1052.

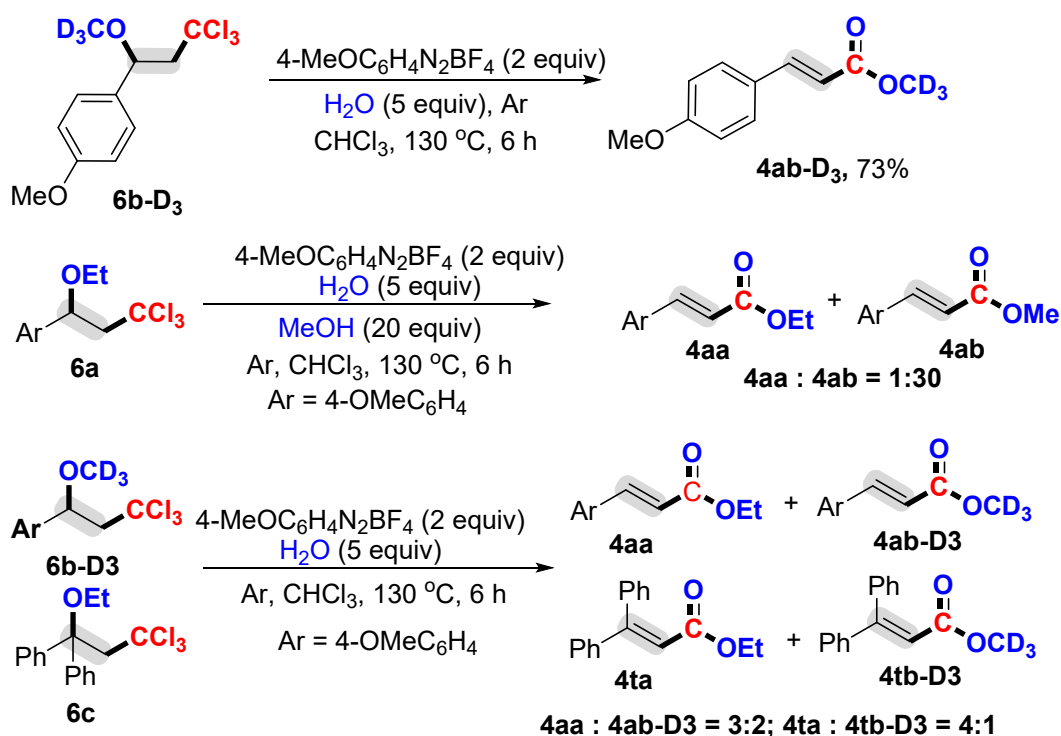

**Figure S1. Experiment probing the source of alkoxy.**

Performing the alkoxy polychloroalkylation of product **6a** in the presence of 4-MeOC<sub>6</sub>H<sub>4</sub>N<sub>2</sub>BF<sub>4</sub> (2 equiv) and CH<sub>3</sub>OH (20.0 equiv) obtained the products **4aa** and **4ab** in a 1:30 ratio, while performing the alkoxy polychloroalkylation of products **6b**-

**D**<sub>3</sub> (0.2 mmol) and **6c** (0.2 mmol) in the presence of 4-MeOC<sub>6</sub>H<sub>4</sub>N<sub>2</sub>BF<sub>4</sub> (4 equiv) delivered the  $\alpha,\beta$ -unsaturated esters **4aa**, **4ab-D**<sub>3</sub>, **4ta** and **4tb-D**<sub>3</sub>. The results of these two cross-control experiments reveal that the alkoxy group of products **6** migrate between molecules, and the alkoxy group is most likely to be removed firstly and then react with an intermediate to form an  $\alpha,\beta$ -unsaturated esters **4**.

**(f) Experiment probing the role of water**

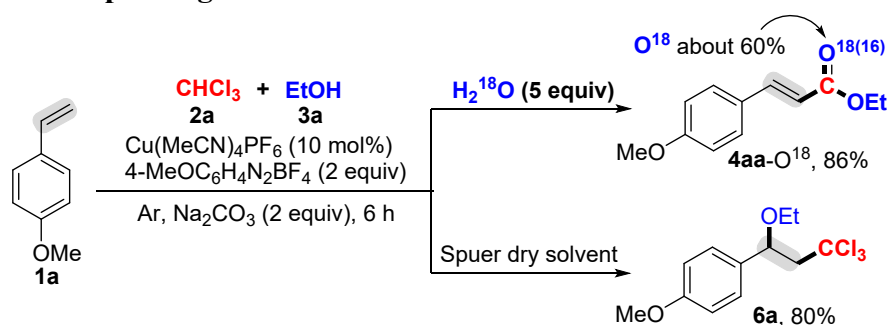

**Figure S2. Experiment probing the role of water**

**Ethyl (*E*)-3-(4-methoxyphenyl)acrylate (**4aa-O**<sup>18(16)</sup>)**

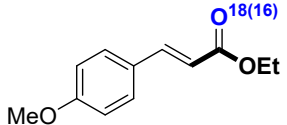
 Yield: 86%; Yellow oil; <sup>1</sup>H NMR (500 MHz, CDCl<sub>3</sub>)  $\delta$  7.64 (d, *J* = 16.0 Hz, 1H), 7.48 (d, *J* = 9.0 Hz, 2H), 6.90 (d, *J* = 9.0 Hz, 2H), 6.31 (d, *J* = 16.0 Hz, 1H), 4.27-4.23 (m, 2H), 3.83 (s, 3H), 1.33 (t, *J* = 7.0 Hz, 3H); <sup>13</sup>C NMR (125 MHz, CDCl<sub>3</sub>)  $\delta$  167.3 (2C), 144.2, 129.7, 127.1, 115.7, 114.3, 60.3, 55.3, 14.3; LRMS (EI, 70eV) *m/z* (%): 208 (M<sup>+</sup>, 42), 206 (69), 161 (100), 134 (92); HRMS *m/z* (ESI) calcd for C<sub>12</sub>H<sub>15</sub>O<sub>2</sub> ([M+H]<sup>+</sup>) 209.1058, found 209.1059.

# Ethyl (*E*)-3-(4-methoxyphenyl)acrylate (4aa-O<sup>18(16)</sup>)

1jh-1yy-074

7.659, 7.627, 7.484, 7.466, 7.263, 6.910, 6.882, 6.324, 6.292, 4.273, 4.256, 4.245, 4.231, 3.833, 1.345, 1.331, 1.317, 0.000

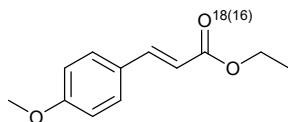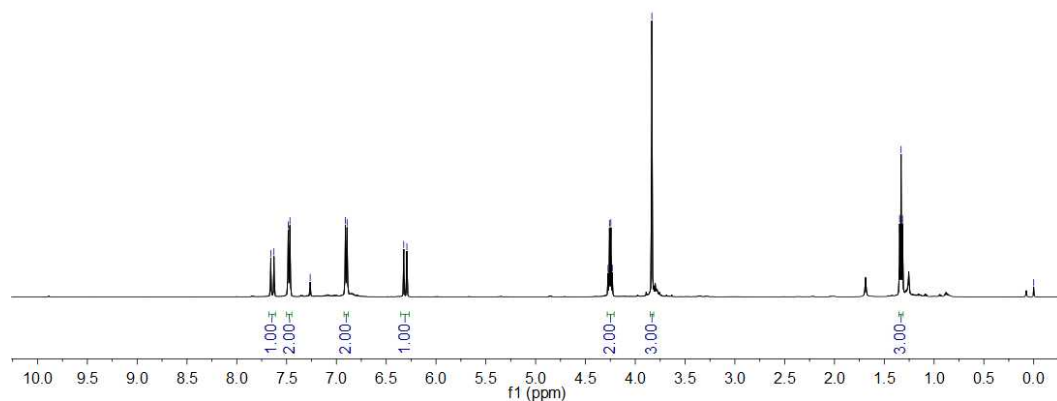

1jh-1yy-074

167.325, 167.290, 161.277, 144.217, 129.650, 127.143, 115.686, 114.259, 77.254, 77.000, 76.745, 60.296, 55.324, 14.318

1jh-1yy-074

167.325, 167.290, 167.33, 167.29, f1 (ppm)

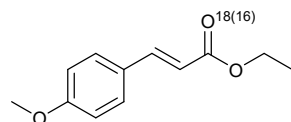

1jh-1yy-074

60.296, 60.34, 60.30, 60.26, f1 (ppm)

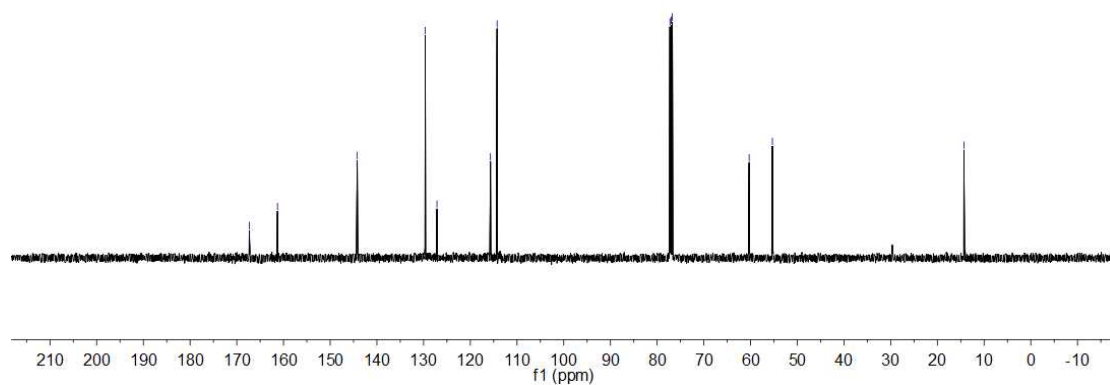

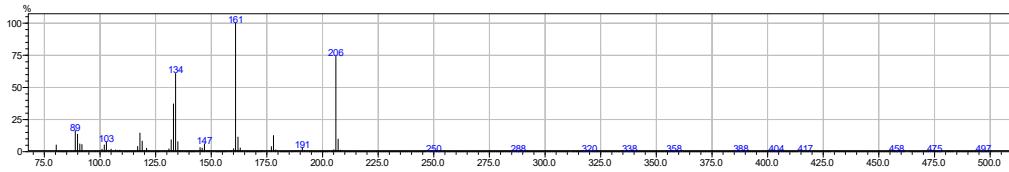

[MS Spectrum]

# of Peaks 419

Raw Spectrum 10.640 (scan : 1329)

Background No Background Spectrum

Base Peak m/z 225.00 (Inten : 7,436)

Event# 1

m/z Absolute Intensity Relative Intensity

|               |              |              |        |    |      |        |    |      |
|---------------|--------------|--------------|--------|----|------|--------|----|------|
| 197.00        | 38           | 0.03         | 212.00 | 11 | 0.01 | 227.00 | 19 | 0.02 |
| 198.00        | 29           | 0.02         | 213.00 | 22 | 0.02 | 228.00 | 11 | 0.01 |
| 199.00        | 27           | 0.02         | 214.00 | 5  | 0.00 | 229.00 | 19 | 0.02 |
| 200.00        | 11           | 0.01         | 215.00 | 16 | 0.01 | 230.00 | 31 | 0.03 |
| 201.00        | 24           | 0.02         | 216.00 | 14 | 0.01 | 231.00 | 21 | 0.02 |
| 202.00        | 47           | 0.04         | 217.00 | 29 | 0.02 | 232.00 | 39 | 0.03 |
| 203.00        | 162          | 0.14         | 218.00 | 22 | 0.02 | 233.00 | 29 | 0.02 |
| 204.00        | 62           | 0.05         | 219.00 | 36 | 0.03 | 234.00 | 36 | 0.03 |
| 205.05        | 1701         | 1.45         | 220.00 | 13 | 0.01 | 235.00 | 42 | 0.04 |
| <b>206.00</b> | <b>84252</b> | <b>71.68</b> | 221.00 | 63 | 0.05 | 236.00 | 24 | 0.02 |
| 207.00        | 11122        | 9.46         | 222.00 | 16 | 0.01 | 237.00 | 41 | 0.03 |
| <b>208.00</b> | <b>1255</b>  | <b>1.07</b>  | 223.00 | 30 | 0.03 | 238.00 | 21 | 0.02 |
| 209.00        | 151          | 0.13         | 224.00 | 41 | 0.03 | 239.00 | 42 | 0.04 |
| 210.00        | 10           | 0.01         | 225.00 | 26 | 0.02 | 240.00 | 8  | 0.01 |
| 211.00        | 21           | 0.02         | 226.00 | 29 | 0.02 | 241.00 | 24 | 0.02 |

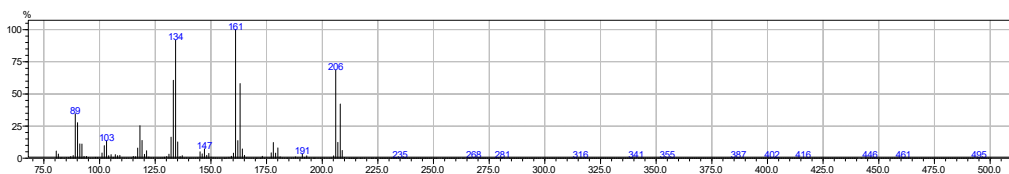

[MS Spectrum]

# of Peaks 419

Raw Spectrum 10.640 (scan : 1329)

Background No Background Spectrum

Base Peak m/z 225.00 (Inten : 7,436)

Event# 1

m/z Absolute Intensity Relative Intensity

|        |     |      |        |     |      |        |      |      |
|--------|-----|------|--------|-----|------|--------|------|------|
| 189.05 | 635 | 0.38 | 190.10 | 684 | 0.40 | 191.10 | 5546 | 3.28 |
|--------|-----|------|--------|-----|------|--------|------|------|

|        |      |      |               |               |              |        |     |      |
|--------|------|------|---------------|---------------|--------------|--------|-----|------|
| 192.10 | 1066 | 0.63 | 203.15        | 281           | 0.17         | 214.00 | 41  | 0.02 |
| 193.05 | 3136 | 1.86 | 204.05        | 544           | 0.32         | 215.00 | 49  | 0.03 |
| 194.10 | 649  | 0.38 | 205.15        | 3219          | 1.90         | 216.00 | 218 | 0.13 |
| 195.10 | 281  | 0.17 | <b>206.05</b> | <b>115964</b> | <b>68.60</b> | 217.00 | 65  | 0.04 |
| 196.10 | 78   | 0.05 | 207.05        | 20779         | 12.29        | 218.00 | 106 | 0.06 |
| 197.10 | 164  | 0.10 | <b>208.10</b> | <b>71332</b>  | <b>42.20</b> | 219.00 | 158 | 0.09 |
| 198.10 | 102  | 0.06 | 209.00        | 10300         | 6.09         | 220.00 | 118 | 0.07 |
| 199.10 | 57   | 0.03 | 210.00        | 948           | 0.56         | 221.00 | 276 | 0.16 |
| 200.10 | 490  | 0.29 | 211.00        | 252           | 0.15         | 222.00 | 33  | 0.02 |
| 201.10 | 124  | 0.07 | 212.00        | 27            | 0.02         | 223.00 | 132 | 0.08 |
| 202.10 | 196  | 0.12 | 213.00        | 46            | 0.03         | 224.00 | 95  | 0.06 |

### (g) HMRS Analysis of intermediates

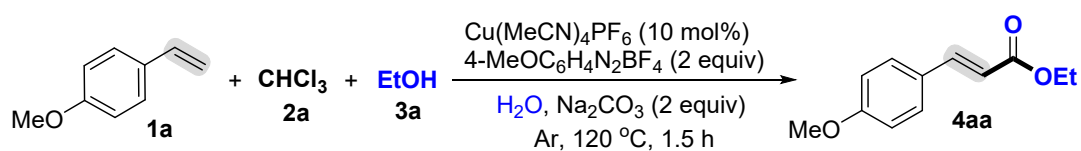

To a Schlenk tube were added substrates  $\text{Cu}(\text{MeCN})_4\text{PF}_6$  (10 mol%), 4-MeOC<sub>6</sub>H<sub>4</sub>N<sub>2</sub>BF<sub>4</sub> (0.4 mmol, 2 equiv), Na<sub>2</sub>CO<sub>3</sub> (0.4 mmol, 2 equiv), alkene **1a** (0.2 mmol), EtOH **3a** (0.6 mmol), H<sub>2</sub>O (5equiv), CHCl<sub>3</sub> **2a** (2 mL), the tube was then charged with argon. The mixture was stirred at 120 °C for 1.5 h. The reaction solution was collected for in-situ HMRS analysis.

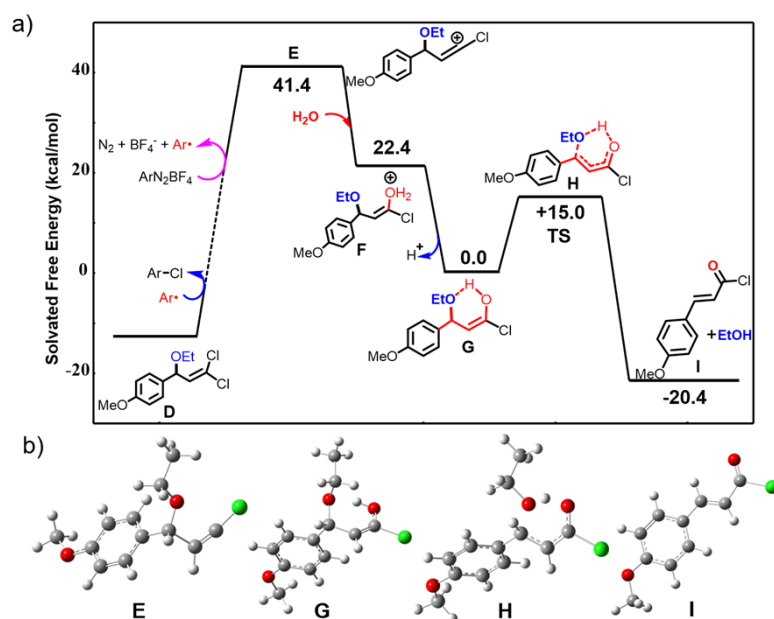

**Figure S3. The proposed reaction pathway based on experimental and DFT data calculated data using M06-2X/6-31G\* SMD=chloroform.**

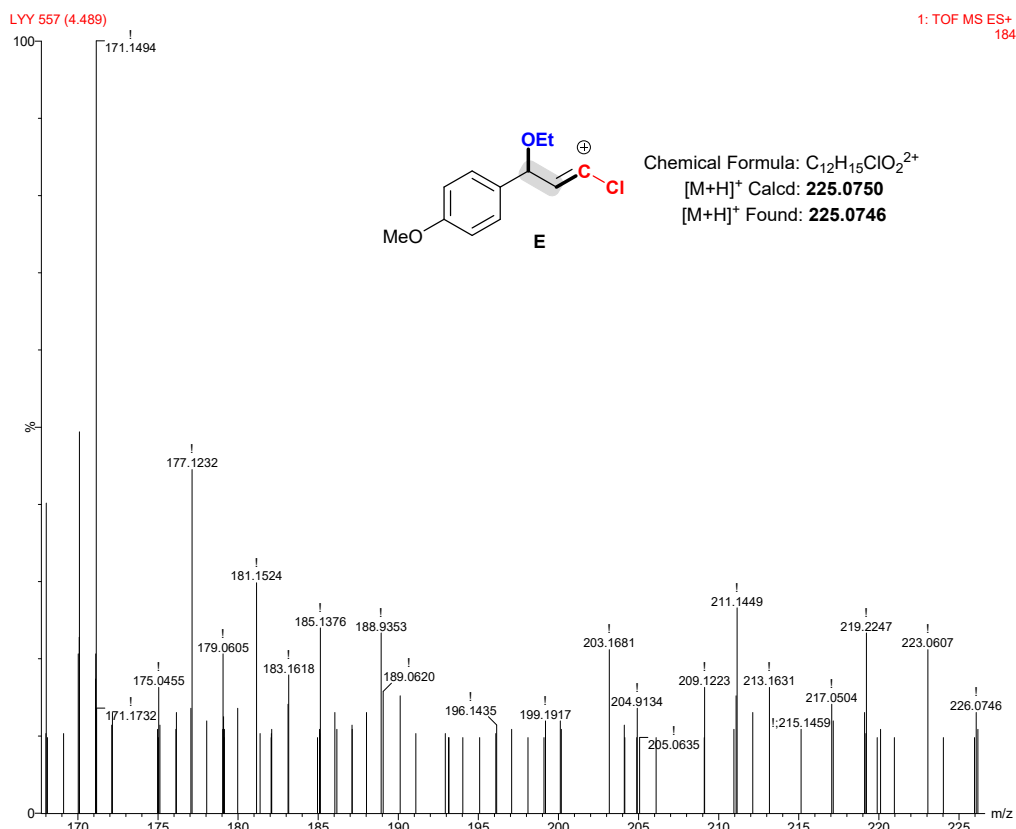

**Figure S4. HMRS monitoring of intermediate E.**

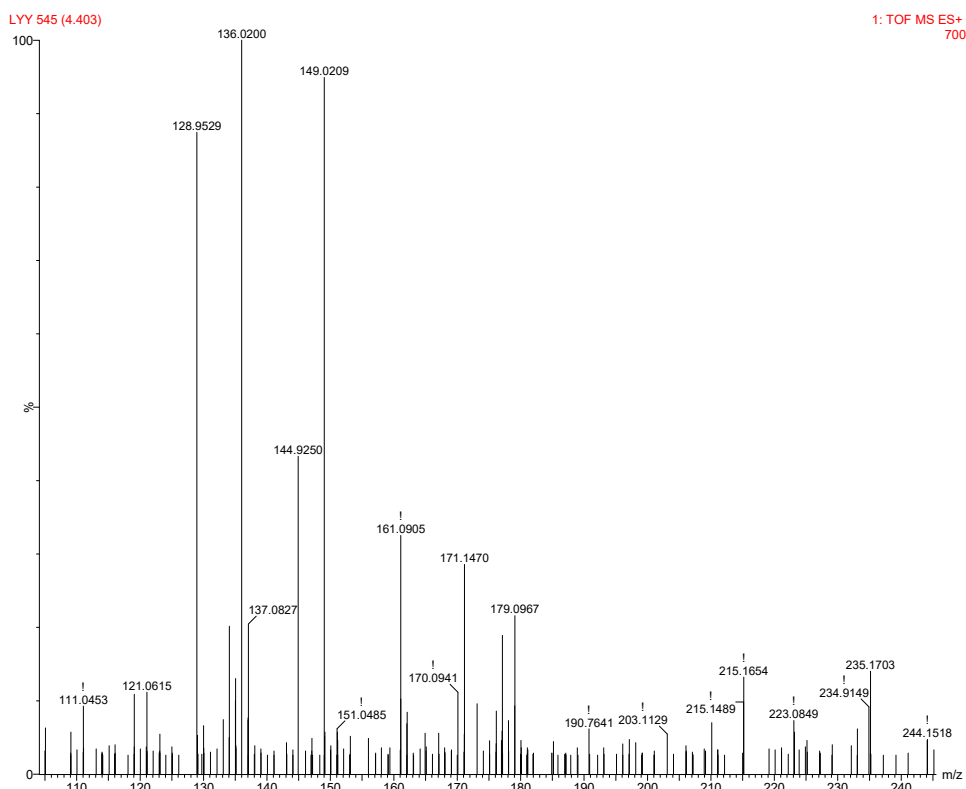

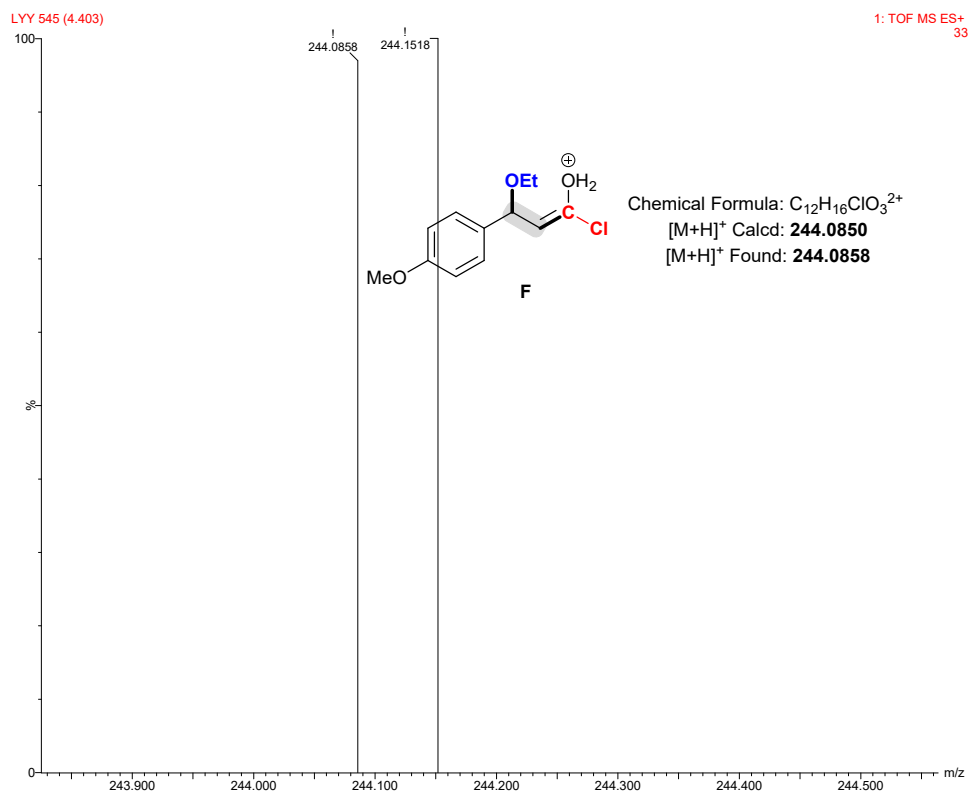

**Figure S5. HMRS monitoring of intermediate F.**

### (g) Computational Details:

All of the quantum chemical calculations were performed using the Gaussian 09 program.<sup>5</sup> Geometry optimizations and frequency calculations were performed at the M06-2X/6-31G\* level of theory with SMD solvation in CDCl<sub>3</sub>.<sup>6-8</sup> The stationary points were characterized by the presence of only positive eigenvalues of the Hessian for minima or a single negative eigenvalue of the Hessian for transition structures. Single point calculations of the potential energy were carried out using M06-2X/6-311++G\*\* level of theory with SMD solvation in chloroform.

Cartesian Coordinates of DFT Optimized Structures

Structure: E



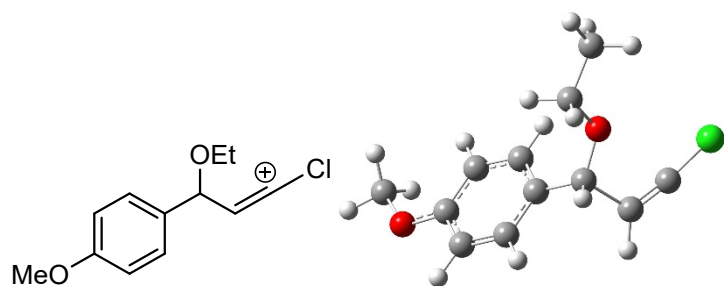

Charge, Spin Multiplicity: 1, 1

Number of imaginary frequencies: 0

SCF Energy: -1075.930697 hartree

SCF Energy + ZPVE: -1075.693685 hartree

Free Energy: -1075.738162 hartree

| Symbol | X           | Y           | Z           |
|--------|-------------|-------------|-------------|
| C      | -3.09762400 | -0.17304600 | 0.06958800  |
| C      | -2.14229700 | -0.00918300 | -0.94243100 |
| C      | -0.79642500 | 0.06033800  | -0.60349800 |
| C      | -0.38953700 | -0.01657200 | 0.72884600  |
| C      | -1.35026500 | -0.18650100 | 1.73425700  |
| C      | -2.69170000 | -0.26351100 | 1.41082300  |
| H      | -2.43598200 | 0.06355900  | -1.98280700 |
| H      | -0.05065400 | 0.19027600  | -1.38357600 |
| H      | -1.04222700 | -0.24585900 | 2.77546300  |
| H      | -3.45255300 | -0.38247200 | 2.17504600  |
| O      | -4.42391800 | -0.25243100 | -0.14275200 |
| C      | -4.89972700 | -0.14165800 | -1.47693700 |
| H      | -4.50611200 | -0.94871400 | -2.10429900 |
| H      | -5.98440900 | -0.22596700 | -1.41367900 |
| H      | -4.63217400 | 0.82867000  | -1.90923600 |
| C      | 1.06679500  | 0.05264400  | 1.07105300  |
| C      | 1.67081500  | -1.39717000 | 0.97167300  |
| C      | 2.62076300  | -1.50966000 | 0.13521800  |
| O      | 1.83703000  | 0.82341000  | 0.19497600  |
| C      | 1.65489300  | 2.23565800  | 0.35388700  |
| H      | 0.60782700  | 2.49389700  | 0.15705500  |
| H      | 1.89161700  | 2.50859300  | 1.39062200  |
| C      | 2.58128100  | 2.92276300  | -0.62314000 |

|    |            |             |             |
|----|------------|-------------|-------------|
| H  | 2.33781800 | 2.63497700  | -1.64997000 |
| H  | 2.47381400 | 4.00705700  | -0.53395900 |
| H  | 3.62310900 | 2.65963600  | -0.41951600 |
| H  | 1.22199900 | 0.34144400  | 2.12138900  |
| Cl | 3.76551800 | -1.51380600 | -0.95289900 |
| H  | 1.26738500 | -2.20283500 | 1.58291400  |

Structure: F

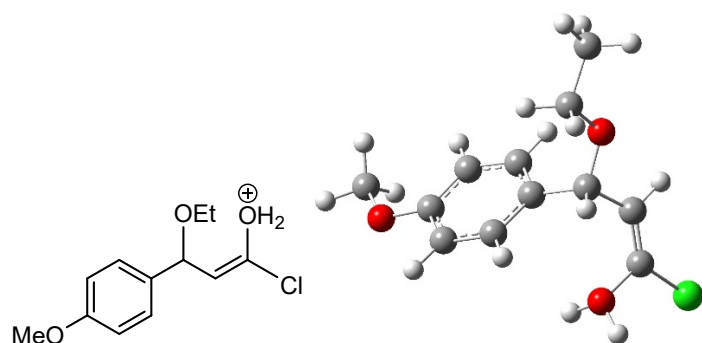

Charge, Spin Multiplicity: 1, 1

Number of imaginary frequencies: 0

SCF Energy: -1152.414601 hartree

SCF Energy + ZPVE: -1152.147902 hartree

Free Energy: -1152.192991 hartree

| Symbol | X           | Y           | Z           |
|--------|-------------|-------------|-------------|
| C      | -2.86251000 | -0.62027800 | 0.18257800  |
| C      | -2.27629600 | -0.04313000 | -0.94979800 |
| C      | -0.97396500 | 0.44289200  | -0.87524800 |
| C      | -0.24449000 | 0.36941700  | 0.31016500  |
| C      | -0.84673000 | -0.19131600 | 1.44109000  |
| C      | -2.14079600 | -0.68844800 | 1.38071000  |
| H      | -2.82255600 | 0.03417900  | -1.88282300 |
| H      | -0.52295800 | 0.90105400  | -1.75204000 |
| H      | -0.30472600 | -0.22090800 | 2.38478900  |
| H      | -2.62196000 | -1.11944600 | 2.25299400  |
| O      | -4.11284900 | -1.13152000 | 0.21909600  |
| C      | -4.88973300 | -1.07414400 | -0.96687800 |

|    |             |             |             |
|----|-------------|-------------|-------------|
| H  | -4.41345000 | -1.63235400 | -1.78081500 |
| H  | -5.84537800 | -1.53792100 | -0.72158600 |
| H  | -5.05852700 | -0.03779300 | -1.28017500 |
| C  | 1.18447300  | 0.89041000  | 0.35271100  |
| C  | 2.11490300  | -0.03414100 | -0.40499900 |
| C  | 2.44610600  | -1.25207600 | -0.02230200 |
| O  | 1.33352200  | 2.13821200  | -0.27593000 |
| C  | 0.73693200  | 3.20753200  | 0.45158800  |
| H  | -0.33161500 | 3.00596700  | 0.60397700  |
| H  | 1.21159200  | 3.27973600  | 1.44132300  |
| C  | 0.93838100  | 4.47761100  | -0.34422600 |
| H  | 0.45535100  | 4.39497300  | -1.32198100 |
| H  | 0.50068200  | 5.32653400  | 0.18824300  |
| H  | 2.00350700  | 4.67331800  | -0.49668700 |
| H  | 1.51280200  | 0.94621900  | 1.40379800  |
| Cl | 3.43600200  | -2.41307800 | -0.77996900 |
| H  | 2.51824400  | 0.32453700  | -1.34841600 |
| O  | 1.86023500  | -1.72733800 | 1.21948500  |
| H  | 2.49596900  | -2.17186700 | 1.83934800  |
| H  | 1.04609200  | -2.28470900 | 1.09596600  |

Structure: **G**

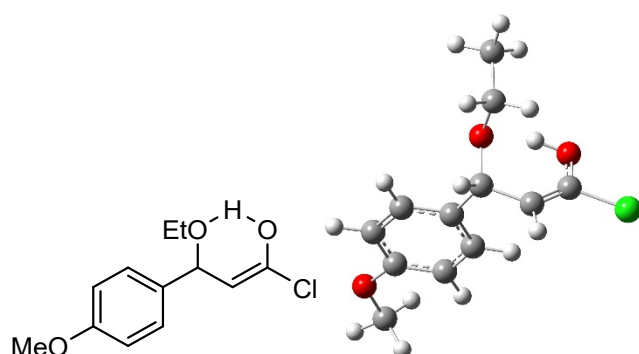

Charge, Spin Multiplicity: 0, 1

Number of imaginary frequencies: 0

SCF Energy: -1152.062255 hartree

SCF Energy + ZPVE: -1151.85189 hartree

Free Energy: -1151.85189 hartree

| Symbol | X           | Y           | Z           |
|--------|-------------|-------------|-------------|
| C      | 3.35421600  | 0.10362000  | -0.01850800 |
| C      | 2.47513300  | -0.96357500 | 0.16087000  |
| C      | 1.12039600  | -0.79662500 | -0.13600500 |
| C      | 0.62935600  | 0.41214000  | -0.61475200 |
| C      | 1.52699000  | 1.47459800  | -0.79076600 |
| C      | 2.87115000  | 1.32945400  | -0.49977100 |
| H      | 2.82505000  | -1.92142500 | 0.52742600  |
| H      | 0.44436800  | -1.63497500 | 0.00585600  |
| H      | 1.15746600  | 2.42958400  | -1.15747900 |
| H      | 3.57335600  | 2.14614300  | -0.63483000 |
| O      | 4.68477100  | 0.05410700  | 0.23918900  |
| C      | 5.21131700  | -1.16526400 | 0.73076700  |
| H      | 5.08080300  | -1.97569600 | 0.00407700  |
| H      | 6.27591700  | -0.99125200 | 0.89056100  |
| H      | 4.74373400  | -1.44748800 | 1.68127800  |
| C      | -0.84196000 | 0.65360900  | -0.89860500 |
| C      | -1.67169000 | -0.60291200 | -1.02800500 |
| C      | -2.28325200 | -1.14749600 | 0.02532900  |
| O      | -1.32267900 | 1.49537500  | 0.16168300  |
| C      | -2.55026000 | 2.16004100  | -0.14188100 |
| H      | -2.40397700 | 2.77899300  | -1.03764300 |
| H      | -3.33300800 | 1.42214500  | -0.36414100 |
| C      | -2.92523300 | 3.00480500  | 1.05560700  |
| H      | -2.13637900 | 3.72888100  | 1.27738100  |
| H      | -3.85355800 | 3.54780500  | 0.85658400  |
| H      | -3.07952200 | 2.37409900  | 1.93707100  |
| H      | -0.92650900 | 1.22061300  | -1.83717000 |
| Cl     | -3.22475000 | -2.61174800 | -0.11635000 |
| H      | -1.74766100 | -1.08070100 | -1.99677100 |
| O      | -2.29477700 | -0.69347600 | 1.28594800  |
| H      | -1.83482100 | 0.18058400  | 1.26550100  |

Structure: **H**

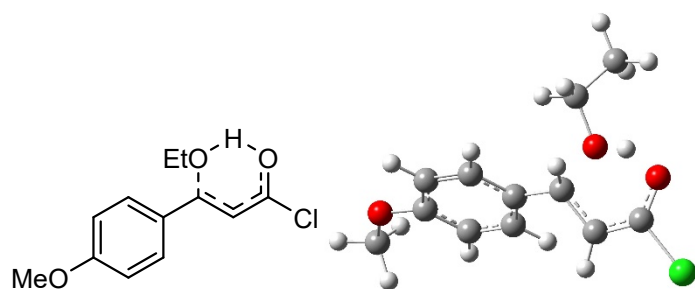

Charge, Spin Multiplicity: 0, 1

Number of imaginary frequencies: 1

SCF Energy: -1152.035988 hartree

SCF Energy + ZPVE: -1151.7831 hartree

Free Energy: -1151.827949 hartree

| Symbol | X           | Y           | Z           |
|--------|-------------|-------------|-------------|
| C      | -3.41775300 | -0.29610000 | 0.21006300  |
| C      | -2.58649500 | -0.81129700 | -0.79130600 |
| C      | -1.20687200 | -0.69431100 | -0.66080800 |
| C      | -0.63708500 | -0.07020600 | 0.45028500  |
| C      | -1.48263800 | 0.45929800  | 1.43389800  |
| C      | -2.85749100 | 0.34287700  | 1.32403200  |
| H      | -3.00144500 | -1.29810100 | -1.66591600 |
| H      | -0.56220800 | -1.08868600 | -1.44174200 |
| H      | -1.05218200 | 0.95517700  | 2.30060600  |
| H      | -3.52292700 | 0.73693400  | 2.08518500  |
| O      | -4.76730200 | -0.36404700 | 0.18810800  |
| C      | -5.38031400 | -1.01294300 | -0.91411800 |
| H      | -5.05915600 | -2.05803500 | -0.98670300 |
| H      | -6.45324000 | -0.97708000 | -0.72380100 |
| H      | -5.15971800 | -0.49317800 | -1.85327100 |
| C      | 0.83318500  | 0.05664100  | 0.58336900  |
| C      | 1.67254000  | -1.06417200 | 0.20697600  |
| C      | 3.01727500  | -0.78373000 | 0.16764500  |
| O      | 1.29584300  | 1.30273900  | -0.45853300 |
| C      | 0.89334300  | 2.63487000  | -0.05327000 |
| H      | -0.18340000 | 2.68221700  | -0.22481600 |
| H      | 1.09456700  | 2.75203900  | 1.01790200  |
| C      | 1.64861700  | 3.64987200  | -0.88220100 |

S21

|    |            |             |             |
|----|------------|-------------|-------------|
| H  | 1.44733500 | 3.50626400  | -1.94674200 |
| H  | 1.33102700 | 4.65735700  | -0.59897900 |
| H  | 2.72689100 | 3.57200200  | -0.70974400 |
| H  | 1.12893300 | 0.56856100  | 1.50505100  |
| Cl | 4.11905400 | -2.19456600 | -0.17466000 |
| O  | 3.56027000 | 0.32931400  | 0.29189800  |
| H  | 2.29795200 | 1.19602300  | -0.31127000 |
| H  | 1.25530300 | -2.01270700 | -0.09569700 |

Structure: **I**

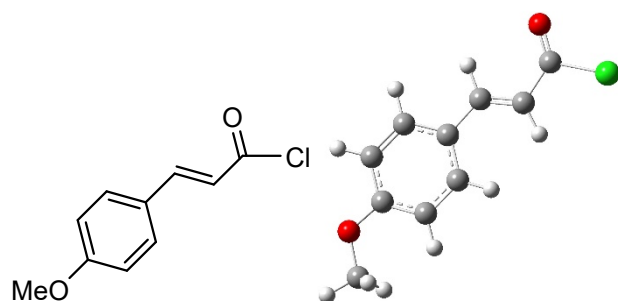

Charge, Spin Multiplicity: 0, 1

Number of imaginary frequencies: 0

SCF Energy: -997.0503865 hartree

SCF Energy + ZPVE: -996.8805885 hartree

Free Energy: -996.9204395 hartree

| Symbol | X          | Y           | Z           |
|--------|------------|-------------|-------------|
| C      | 3.14193800 | 0.14664900  | -0.00009200 |
| C      | 2.29332400 | -0.96941700 | 0.00010700  |
| C      | 0.91880400 | -0.78310800 | 0.00023400  |
| C      | 0.35640600 | 0.50092400  | 0.00015600  |
| C      | 1.22607500 | 1.60644700  | 0.00008800  |
| C      | 2.59737900 | 1.43835900  | -0.00007600 |
| H      | 2.69630100 | -1.97509800 | 0.00017100  |
| H      | 0.27513000 | -1.65773000 | 0.00039800  |
| H      | 0.80877000 | 2.61009400  | 0.00008400  |
| H      | 3.27261300 | 2.28769200  | -0.00019600 |
| O      | 4.48809400 | 0.07333500  | -0.00023500 |

|    |             |             |             |
|----|-------------|-------------|-------------|
| C  | 5.08578700  | -1.21367900 | 0.00001700  |
| H  | 4.80812200  | -1.78013500 | -0.89566500 |
| H  | 6.16224500  | -1.04239000 | -0.00003400 |
| H  | 4.80810300  | -1.77975700 | 0.89592600  |
| C  | -1.07785500 | 0.74178200  | 0.00019300  |
| C  | -2.06110800 | -0.18146900 | -0.00024000 |
| C  | -3.44151600 | 0.28852100  | -0.00008800 |
| H  | -1.38004600 | 1.78873700  | 0.00059700  |
| Cl | -4.63771700 | -1.08685600 | -0.00001200 |
| O  | -3.85780400 | 1.40487900  | -0.00003600 |
| H  | -1.88776700 | -1.25061800 | -0.00070400 |

Structure: **Hexafluorophosphate acid**

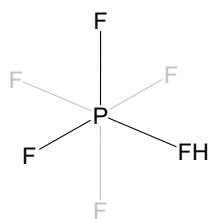

Charge, Spin Multiplicity: 0, 1

Number of imaginary frequencies: 0

SCF Energy: -941.1279378 hartree

SCF Energy + ZPVE: -941.1008898 hartree

Free Energy: -941.1321488 hartree

| Symbol | X           | Y           | Z           |
|--------|-------------|-------------|-------------|
| P      | 0.44502600  | 0.45811500  | 0.36331600  |
| F      | 0.44502600  | 2.00734800  | 0.06058700  |
| F      | 0.44502600  | 0.45811500  | 1.91029400  |
| F      | -1.10420700 | 0.45811500  | 0.06058700  |
| F      | 0.44502600  | -1.09111800 | 0.06058700  |
| F      | 1.99425900  | 0.45811500  | 0.06058700  |
| F      | 0.44502600  | 0.45811500  | -2.05415500 |
| H      | 0.44502600  | 0.45811500  | -2.99324700 |

Structure: **Hexafluorophosphate (PF<sub>6</sub><sup>-</sup>)**

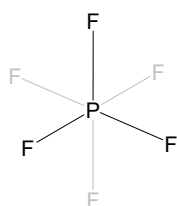

Charge, Spin Multiplicity: -1, 1

Number of imaginary frequencies: 0

SCF Energy: -940.748092 hartree

SCF Energy + ZPVE: -940.728252 hartree

Free Energy: -940.755367 hartree

| Symbol | X           | Y           | Z           |
|--------|-------------|-------------|-------------|
| P      | 0.44502600  | 0.45811500  | 0.00000000  |
| F      | 0.44502600  | 2.08037400  | 0.00000000  |
| F      | 0.44502600  | 0.45811500  | 1.62225800  |
| F      | -1.17723200 | 0.45811500  | 0.00000000  |
| F      | 0.44502600  | -1.16414300 | 0.00000000  |
| F      | 2.06728500  | 0.45811500  | 0.00000000  |
| F      | 0.44502600  | 0.45811500  | -1.62225800 |

Structure: **EtOH**

Charge, Spin Multiplicity: 0, 1

Number of imaginary frequencies: 0

SCF Energy: -155.0197931 hartree

SCF Energy + ZPVE: -154.9640201 hartree

Free Energy: -154.9640201 hartree

| Symbol | X           | Y           | Z           |
|--------|-------------|-------------|-------------|
| O      | -1.23144700 | -0.26080700 | -0.11074500 |
| H      | -1.23414300 | -0.89470900 | 0.62296200  |
| C      | -0.08370300 | 0.55828700  | 0.04731700  |
| H      | -0.12392800 | 1.28714000  | -0.76798800 |
| H      | -0.13342200 | 1.12146400  | 0.99071000  |
| C      | 1.20704900  | -0.24016700 | -0.02174600 |



|   |            |             |             |
|---|------------|-------------|-------------|
| H | 2.07911700 | 0.41649300  | 0.06060400  |
| H | 1.25589900 | -0.96899500 | 0.79568500  |
| H | 1.26798100 | -0.78365200 | -0.96944200 |

Structure: **H<sub>2</sub>O**

Charge, Spin Multiplicity: 0, 1

Number of imaginary frequencies: 0

SCF Energy: -76.42827179 hartree

SCF Energy + ZPVE: -76.40690279 hartree

Free Energy: -76.42456779 hartree

| Symbol | X          | Y           | Z           |
|--------|------------|-------------|-------------|
| O      | 0.00000000 | 0.00000000  | 0.11951500  |
| H      | 0.00000000 | 0.76152500  | -0.47805800 |
| H      | 0.00000000 | -0.76152500 | -0.47805800 |

**(D) Analytical data**

**Ethyl (*E*)-3-(4-methoxyphenyl)acrylate (4aa)<sup>9</sup>:**

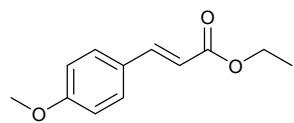

Yield: 86%, Yellow oil; <sup>1</sup>H NMR (500 MHz, CDCl<sub>3</sub>) δ 7.64 (d, *J* = 16.0 Hz, 1H), 7.47 (d, *J* = 9.0 Hz, 2H), 6.90 (d, *J* = 9.0 Hz, 2H), 6.31 (d, *J* = 16.0 Hz, 1H), 4.27-4.23 (m, 2H), 3.83 (s, 3H), 1.25 (t, *J* = 7.0 Hz, 3H); <sup>13</sup>C NMR (125 MHz, CDCl<sub>3</sub>) δ 167.3, 161.3, 144.2, 129.6, 127.2, 115.7, 114.3, 60.3, 55.3, 14.3; LRMS (EI, 70eV) *m/z* (%): 206 (M<sup>+</sup>, 73), 160 (100), 134 (64), 133 (39); HRMS *m/z* (ESI) calcd for C<sub>12</sub>H<sub>15</sub>O<sub>3</sub> ([M+H]<sup>+</sup>) 207.1010, found 207.1013.

**Methyl (*E*)-3-(4-methoxyphenyl)acrylate (4ab)<sup>9</sup>:**

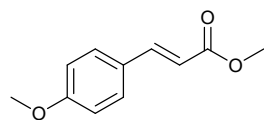

Yield: 73%, Yellow oil; <sup>1</sup>H NMR (500 MHz, CDCl<sub>3</sub>) δ 7.65 (d, *J* = 16.0 Hz, 1H), 7.47 (d, *J* = 8.5 Hz, 2H), 6.90 (d, *J* = 9.0 Hz, 2H), 6.31 (d, *J* = 16.0 Hz, 1H), 3.83 (s, 3H), 3.79 (s, 3H); <sup>13</sup>C NMR (125 MHz, CDCl<sub>3</sub>) δ 167.7, 161.3, 144.5, 129.7, 127.1, 115.2, 114.3, 55.3, 51.5; LRMS (EI, 70eV) *m/z* (%): 192 (M<sup>+</sup>, 72), 161 (100), 133 (37), 89 (27); HRMS *m/z* (ESI) calcd for C<sub>11</sub>H<sub>13</sub>O<sub>3</sub> ([M+H]<sup>+</sup>) 193.0859, found 193.0860.

**Butyl (*E*)-3-(4-methoxyphenyl)acrylate (4ac)<sup>10</sup>:**

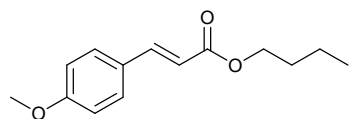

Yield: 77%, Yellow oil; <sup>1</sup>H NMR (500 MHz, CDCl<sub>3</sub>) δ 7.64 (d, *J* = 16.0 Hz, 1H), 7.48 (d, *J* = 8.5 Hz, 2H), 6.90 (d, *J* = 8.5 Hz, 2H), 6.31 (d, *J* = 16.0 Hz, 1H), 4.20 (t, *J* = 6.5 Hz, 2H), 3.83 (s, 3H), 1.70-1.67 (m, 2H), 1.46-1.43 (m, 2H), 0.96 (t, *J* = 7.0 Hz, 3H); <sup>13</sup>C NMR (125 MHz, CDCl<sub>3</sub>) δ 167.4, 161.3, 144.2, 129.6, 127.2, 115.7, 114.3, 64.2, 55.3, 30.8, 19.2, 13.7; LRMS (EI, 70eV) *m/z* (%): 234 (M<sup>+</sup>, 38), 178 (100), 161 (98), 134 (39); HRMS *m/z* (ESI) calcd for C<sub>12</sub>H<sub>19</sub>O<sub>3</sub> ([M+H]<sup>+</sup>) 235.1329, found 235.1333.

**Dodecyl (*E*)-3-(4-methoxyphenyl)acrylate (4ad):**

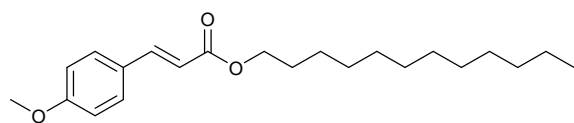

Yield: 53%, Yellow solid; <sup>1</sup>H NMR (500 MHz, CDCl<sub>3</sub>) δ 7.64 (d, *J* = 16.0

Hz, 1H), 7.48 (d, *J* = 8.5 Hz, 2H), 6.90 (d, *J* = 8.5 Hz, 2H), 6.31 (d, *J* = 16.0 Hz, 1H), 4.18 (t, *J* = 7.0 Hz, 2H), 3.84 (s, 3H), 1.71-1.64 (m, 2H), 1.26 (s, 18H), 0.88 (t, *J* = 7.0 Hz, 3H); <sup>13</sup>C NMR (125 MHz, CDCl<sub>3</sub>) δ 167.5, 161.3, 144.2, 129.7, 127.2, 115.7, 114.3, 64.6, 55.3, 31.9, 29.6(3C), 29.5, 29.3(2C), 26.0, 22.7, 14.1; LRMS (EI, 70eV) *m/z* (%): 346 (M<sup>+</sup>, 15), 178 (100), 161 (63), 134 (27); HRMS *m/z* (ESI) calcd for C<sub>22</sub>H<sub>35</sub>O<sub>3</sub> ([M+H]<sup>+</sup>) 347.2581, found 347.2582.

**Neopentyl (*E*)-3-(4-methoxyphenyl)acrylate (4ae):**

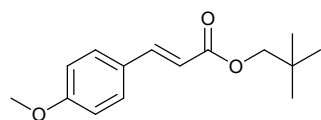

Yield: 58%, Yellow oil; <sup>1</sup>H NMR (500 MHz, CDCl<sub>3</sub>) δ 7.65 (d, *J* = 16.0 Hz, 1H), 7.49 (d, *J* = 8.5 Hz, 2H), 6.90 (d,

*J* = 8.5 Hz, 2H), 6.34 (d, *J* = 16.0 Hz, 1H), 3.90 (s, 2H), 3.84 (s, 3H), 0.99 (s, 9H); <sup>13</sup>C NMR (125 MHz, CDCl<sub>3</sub>) δ 167.5, 161.3, 144.2, 129.7, 127.2, 115.8, 114.3, 73.7, 55.3, 31.5, 26.5; LRMS (EI, 70eV) *m/z* (%): 248 (M<sup>+</sup>, 38), 178 (24), 161 (100), 133 (21); HRMS *m/z* (ESI) calcd for C<sub>15</sub>H<sub>21</sub>O<sub>3</sub> ([M+H]<sup>+</sup>) 249.1485, found 249.1484.

**But-3-en-1-yl (*E*)-3-(4-methoxyphenyl)acrylate (4af):**

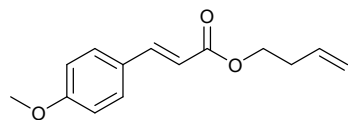

Yield: 78%, Yellow oil; <sup>1</sup>H NMR (500 MHz, CDCl<sub>3</sub>) δ 7.64 (d, *J* = 16.0 Hz, 1H), 7.47 (d, *J* = 8.5 Hz, 2H), 6.90

(d, *J* = 8.5 Hz, 2H), 6.31 (d, *J* = 16.0 Hz, 1H), 5.87-5.82 (m, 1H), 5.17-5.09 (m, 2H), 4.25 (t, *J* = 7.0 Hz, 2H), 3.83 (s, 3H), 2.48-2.44 (m, 2H); <sup>13</sup>C NMR (125 MHz, CDCl<sub>3</sub>) δ 167.3, 161.3, 144.4, 134.1, 129.7, 127.1, 117.1 115.5, 114.3, 63.4, 55.3 (2C), 33.2;

LRMS (EI, 70eV)  $m/z$  (%): 232 ( $M^+$ , 32), 178 (100), 161 (98), 133 (34); HRMS  $m/z$  (ESI) calcd for  $C_{14}H_{17}O_3$  ( $[M+H]^+$ ) 233.1172, found 233.1170.

**3-Bromopropyl (*E*)-3-(4-methoxyphenyl)acrylate (4ag):**

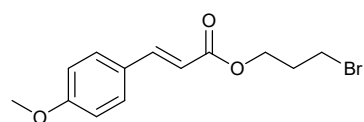

Yield: 53%, Yellow oil;  $^1H$  NMR (500 MHz,  $CDCl_3$ )  $\delta$

7.65 (d,  $J = 16.0$  Hz, 1H), 7.48 (d,  $J = 8.5$  Hz, 2H), 6.91

(d,  $J = 8.5$  Hz, 2H), 6.31 (d,  $J = 16.0$  Hz, 1H), 4.34 (t,  $J = 6.0$  Hz, 2H), 3.84 (s, 3H),

3.52 (t,  $J = 6.5$  Hz, 2H), 2.28-2.22 (m, 2H);  $^{13}C$  NMR (125 MHz,  $CDCl_3$ )  $\delta$  167.1,

161.5, 144.8, 129.8, 127.0, 115.1, 114.3, 62.1, 55.4, 31.9, 29.5; LRMS (EI, 70eV)  $m/z$

(%): 300 ( $M^+ + 2$ , 3), 298 (3), 268 (53), 253 (100), 145 (78); HRMS  $m/z$  (ESI) calcd

for  $C_{13}H_{16}O_3Br$  ( $[M+H]^+$ ) 299.0277, found 299.0275.

**Isopropyl (*E*)-3-(4-methoxyphenyl)acrylate (4ah)<sup>11</sup>:**

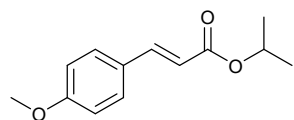

Yield: 58%, Yellow oil;  $^1H$  NMR (500 MHz,  $CDCl_3$ )  $\delta$  7.63

(d,  $J = 16.0$  Hz, 1H), 7.48 (d,  $J = 9.0$  Hz, 2H), 6.90 (d,  $J = 9.0$

Hz, 2H), 6.29 (d,  $J = 16.0$  Hz, 1H), 5.13 (m, 1H), 3.84 (s, 3H), 1.31 (d,  $J = 6.0$  Hz,

6H);  $^{13}C$  NMR (125 MHz,  $CDCl_3$ )  $\delta$  166.8, 161.2, 144.0, 129.6, 127.2, 116.2, 114.2,,

67.6, 55.3, 22.0; LRMS (EI, 70eV)  $m/z$  (%): 220 ( $M^+$ , 97), 178 (92), 161(100), 134

(99); HRMS  $m/z$  (ESI) calcd for  $C_{13}H_{17}O_3$  ( $[M+H]^+$ ) 211.1172, found 211.1172.

**(1R,2R,5S)-2-Isopropyl-5-methylcyclohexyl (*E*)-3-(4-methoxyphenyl)acrylate**

**(4ai)<sup>12</sup>:**

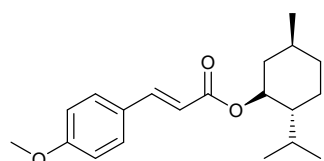

Yield: 55%, Yellow solid;  $^1H$  NMR (500 MHz,  $CDCl_3$ )  $\delta$

7.63 (d,  $J = 16.0$  Hz, 1H), 7.48 (d,  $J = 8.5$  Hz, 2H), 6.90 (d,

$J = 8.7$  Hz, 2H), 6.30 (d,  $J = 16.0$  Hz, 1H), 4.84-4.79 (m, 1H), 3.83 (s, 3H), 2.06 (d,  $J$

= 12.0 Hz, 1H), 1.95-1.91 (m, 1H), 1.71-1.68 (m, 2H), 1.63-1.56 (m, 1H), 1.47-1.42 (m, 2H), 1.12 – 1.00 (m, 2H), 0.93-0.90 (m, 6H), 0.79 (d,  $J = 7.0$  Hz, 3H);  $^{13}\text{C}$  NMR (125 MHz,  $\text{CDCl}_3$ )  $\delta$  166.9, 161.2, 144.0, 129.6, 127.3, 116.2, 114.3, 74.0, 55.3, 47.2, 41.0, 34.31 (s), 31.4, 26.3, 23.5, 22.0, 20.8, 16.4; LRMS (EI, 70eV)  $m/z$  (%): 316 ( $\text{M}^+$ , 27), 178 (100), 133 (51), 95 (63); HRMS  $m/z$  (ESI) calcd for  $\text{C}_{20}\text{H}_{29}\text{O}_3$  ( $[\text{M}+\text{H}]^+$ ) 317.2111, found 317.2108.

**(1r,3r,5r,7r)-Adamantan-2-yl (*E*)-3-(4-methoxyphenyl)acrylate (4aj):**

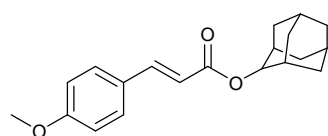

Yield: 48%, Yellow oil;  $^1\text{H}$  NMR (500 MHz,  $\text{CDCl}_3$ )  $\delta$  7.65 (d,  $J = 16.0$  Hz, 1H), 7.49 (d,  $J = 8.5$  Hz, 2H), 6.90 (d,  $J = 8.0$  Hz, 2H), 6.35 (d,  $J = 16.0$  Hz, 1H), 5.05 (s, 1H), 3.84 (s, 3H), 2.12-2.07 (m, 4H), 1.88-1.76 (m, 8H), 1.61-1.59 (m, 2H);  $^{13}\text{C}$  NMR (125 MHz,  $\text{CDCl}_3$ )  $\delta$  166.7, 161.2, 143.8, 129.6, 127.3, 116.6, 114.3, 55.3, 37.4, 36.4, 31.9 (2C), 27.3, 27.0; LRMS (EI, 70eV)  $m/z$  (%): 312 ( $\text{M}^+$ , 74), 267 (33), 178 (83), 161 (100); HRMS  $m/z$  (ESI) calcd for  $\text{C}_{20}\text{H}_{25}\text{O}_3$  ( $[\text{M}+\text{H}]^+$ ) 313.1798, found 313.1802.

**Ethyl (*E*)-3-(4-ethoxyphenyl)acrylate (4ba)<sup>13</sup>:**

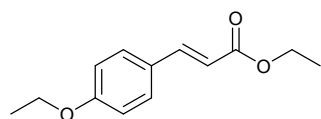

Yield: 77%, Yellow oil;  $^1\text{H}$  NMR (500 MHz,  $\text{CDCl}_3$ )  $\delta$  7.64 (d,  $J = 16.0$  Hz, 1H), 7.45 (d,  $J = 8.5$  Hz, 2H), 6.88 (d,  $J = 9.0$  Hz, 2H), 6.30 (d,  $J = 16.0$  Hz, 1H), 4.25 (m, 2H), 4.05 (m, 2H), 1.42 (t,  $J = 7.0$  Hz, 3H), 1.33 (t,  $J = 7.0$  Hz, 3H);  $^{13}\text{C}$  NMR (125 MHz,  $\text{CDCl}_3$ )  $\delta$  167.4, 160.7, 144.3, 129.6, 126.9, 115.5, 114.7, 63.5, 60.3, 14.7, 14.3; LRMS (EI, 70eV)  $m/z$  (%): 220 ( $\text{M}^+$ , 100), 175 (59), 147 (97), 120 (59); HRMS  $m/z$  (ESI) calcd for  $\text{C}_{13}\text{H}_{17}\text{O}_3$  ( $[\text{M}+\text{H}]^+$ ) 221.1172, found 211.1169.

**Ethyl (*E*)-3-(4-(benzyloxy)phenyl)acrylate (4ca)<sup>14</sup>:**

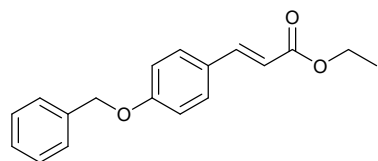

Yield: 80%, Yellow solid; <sup>1</sup>H NMR (500 MHz, CDCl<sub>3</sub>) δ 7.64 (d, *J* = 16.0 Hz, 1H), 7.48-7.46 (m, 2H), 7.44 – 7.38 (m, 4H), 7.35-7.34 (m, 1H), 6.98-6.97 (m, 2H), 6.31 (d, *J* = 16.0 Hz, 1H), 5.10 (s, 2H), 4.27-4.23 (m, 2H), 1.33 (t, *J* = 7.0 Hz, 3H); <sup>13</sup>C NMR (125 MHz, CDCl<sub>3</sub>) δ 167.3, 160.5, 144.2, 136.5, 129.7, 128.6, 128.1, 127.4, 115.9, 115.2, 70.1, 60.3, 14.3; LRMS (EI, 70eV) *m/z* (%): 282 (M<sup>+</sup>, 8), 237 (3), 207 (5), 91 (100); HRMS *m/z* (ESI) calcd for C<sub>18</sub>H<sub>19</sub>O<sub>3</sub> ([M+H]<sup>+</sup>) 283.1329, found 283.1332.

**Ethyl (*E*)-3-(4-(methylthio)phenyl)acrylate (4da)<sup>15</sup>:**

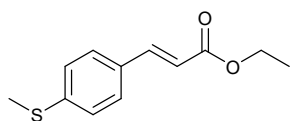

Yield: 45%, Yellow oil; <sup>1</sup>H NMR (500 MHz, CDCl<sub>3</sub>) δ 7.63 (d, *J* = 16.0 Hz, 1H), 7.44 (d, *J* = 7.5 Hz, 2H), 7.23 (d, *J* = 8.0 Hz, 2H), 6.39 (d, *J* = 16.0 Hz, 1H), 4.28-4.24 (m, 2H), 2.50 (s, 3H), 1.34 (t, *J* = 7.0 Hz, 3H); <sup>13</sup>C NMR (125 MHz, CDCl<sub>3</sub>) δ 167.1, 144.0, 141.8, 131.0, 128.4, 126.0, 117.2, 60.4, 15.2, 14.3; LRMS (EI, 70eV) *m/z* (%): 222 (M<sup>+</sup>, 100), 177 (62), 150 (65), 134 (49); HRMS *m/z* (ESI) calcd for C<sub>12</sub>H<sub>15</sub>O<sub>2</sub>S ([M+H]<sup>+</sup>) 223.0787, found 223.0791.

**Ethyl (*E*)-3-(2-methoxyphenyl)acrylate (4ga)<sup>9</sup>:**

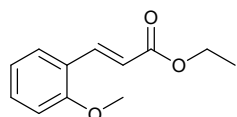

Yield: 67%, Yellow oil; <sup>1</sup>H NMR (500 MHz, CDCl<sub>3</sub>) δ 7.99 (d, *J* = 16.0 Hz, 1H), 7.52-7.50 (m, 1H), 7.37-7.32 (m, 1H), 6.97-6.94 (m, 1H), 6.91 (d, *J* = 8.0 Hz, 1H), 6.53 (d, *J* = 16.0 Hz, 1H), 4.28-4.24 (m, 2H), 3.89 (s, 3H), 1.34 (t, *J* = 7.0 Hz, 3H); <sup>13</sup>C NMR (125 MHz, CDCl<sub>3</sub>) δ 167.5, 158.3, 140.0, 131.4, 128.9, 123.4, 120.6, 118.8, 111.1, 60.3, 55.4, 14.4; LRMS (EI, 70eV)

$m/z$  (%): 206 ( $M^+$ , 69), 161 (100), 147 (91), 118 (53); HRMS  $m/z$  (ESI) calcd for  $C_9H_{15}O_3$  ( $[M+H]^+$ ) 207.1016, found 207.1016.

**Ethyl (*E*)-3-(4-methoxy-3-methylphenyl)acrylate (4ha)**

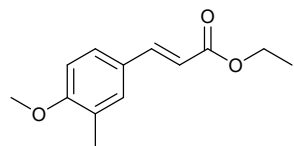

Yield: 67%, Yellow oil;  $^1H$  NMR (500 MHz,  $CDCl_3$ )  $\delta$  7.63 (d,  $J = 16.0$  Hz, 1H), 7.34 (s, 2H), 6.81 (d,  $J = 9.0$  Hz, 1H), 6.30 (d,  $J = 16.0$  Hz, 1H), 4.25 (m, 2H), 3.85 (s, 3H), 2.22 (s, 3H), 1.33 (t,  $J = 7.0$  Hz, 3H);  $^{13}C$  NMR (125 MHz,  $CDCl_3$ )  $\delta$  167.4, 159.6, 144.5, 130.0, 127.7, 127.2, 126.6, 115.3, 109.8, 60.2, 55.4, 16.2, 14.3; LRMS (EI, 70eV)  $m/z$  (%): 220 ( $M^+$ , 100), 175 (99), 148 (94), 115 (36); HRMS  $m/z$  (ESI) calcd for  $C_{13}H_{17}O_3$  ( $[M+H]^+$ ) 221.1172, found 221.1168.

**Ethyl (*E*)-3-(3-methylthiophen-2-yl)acrylate (4ja):**

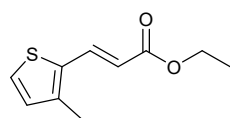

Yield: 52%, Yellow oil;  $^1H$  NMR (500 MHz,  $CDCl_3$ )  $\delta$  7.84 (d,  $J = 16.0$  Hz, 1H), 7.25 (d,  $J = 5.0$  Hz, 1H), 6.86 (d,  $J = 5.5$  Hz, 1H), 6.17 (d,  $J = 16.0$  Hz, 1H), 4.25 (m, 2H), 2.34 (s, 3H), 1.33 (t,  $J = 7.0$  Hz, 3H);  $^{13}C$  NMR (125 MHz,  $CDCl_3$ )  $\delta$  167.1, 141.2, 135.4, 133.6, 131.1, 126.8, 115.9, 60.4, 14.3, 14.1; LRMS (EI, 70eV)  $m/z$  (%): 196 ( $M^+$ , 98), 151 (100), 123 (99), 97 (33); HRMS  $m/z$  (ESI) calcd for  $C_{10}H_{13}SO_2$  ( $[M+H]^+$ ) 197.0631, found 197.0629.

**Ethyl (2*E*,4*E*)-5-(4-methoxyphenyl)penta-2,4-dienoate (4ka):**

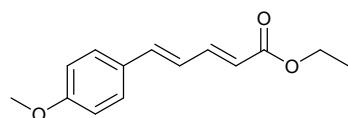

Yield: 47%, Yellow oil;  $^1H$  NMR (500 MHz,  $CDCl_3$ )  $\delta$  7.46-7.43 (m, 1H), 7.42-7.40 (m, 2H), 6.89-6.87 (m, 2H), 6.84 (s, 1H), 6.78-6.72 (m, 1H), 5.94 (d,  $J = 16.0$  Hz, 1H), 4.24-4.20 (m, 2H), 3.83 (s, 3H), 1.31 (t,  $J = 7.0$  Hz, 3H);  $^{13}C$  NMR (125 MHz,  $CDCl_3$ )  $\delta$  167.3, 160.4, 145.0,

140.1, 128.8, 128.6, 124.1, 120.0, 114.2, 60.2, 55.3, 14.3; LRMS (EI, 70eV)  $m/z$  (%): 232 ( $M^+$ , 58), 187 (27), 159 (100), 115 (52); HRMS  $m/z$  (ESI) calcd for  $C_{14}H_{17}O_3$  ( $[M+H]^+$ ) 233.1172, found 233.1171.

**Ethyl -3-(naphthalen-2-yl)-3-phenylacrylate (4ma):**

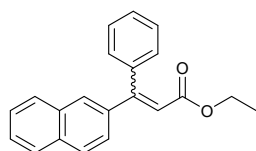

Yield: 87%, E/Z = 1.5:1; Yellow solid;  $^1H$  NMR (500 MHz,  $CDCl_3$ )  $\delta$  7.85-7.68 (m, 3H), 7.50-7.24 (m, 9H), 6.50 (s, 0.6H), 6.45 (s, 0.4H), 4.08-4.02 (m, 2H), 1.13 (t,  $J$  = 7.0 Hz, 1.7H), 1.04 (t,  $J$  = 7.0 Hz, 1.3H);  $^{13}C$  NMR (125 MHz,  $CDCl_3$ )  $\delta$  166.1, 156.4, 129.2, 128.8, 128.6, 128.4 (2C), 128.2 (2C), 127.9, 127.5, 127.3 (2C), 127.0, 126.4, 125.1, 117.8, 117.7, 60.1, 14.0(2C); LRMS (EI, 70eV)  $m/z$  (%): 302 ( $M^+$ , 100), 257 (63), 229 (80), 202 (19); HRMS  $m/z$  (ESI) calcd for  $C_{21}H_{19}O_2$  ( $[M+H]^+$ ) 303.1380, found 303.1378.

**Ethyl-3-phenyl-3-(*o*-tolyl)acrylate (4na):**

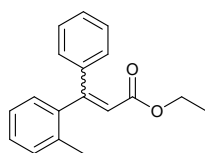

Yield: 87%, E/Z > 20:1; Yellow oil;  $^1H$  NMR (500 MHz,  $CDCl_3$ )  $\delta$  7.33-7.31 (m, 4H), 7.28-7.26 (m, 2H), 7.26-7.22 (m, 2H), 7.06 (d,  $J$  = 7.5 Hz, 1H), 6.52 (s, 1H), 4.03-3.99 (m, 2H), 2.08 (s, 3H), 1.07 (t,  $J$  = 7.0 Hz, 3H);  $^{13}C$  NMR (125 MHz,  $CDCl_3$ )  $\delta$  165.8, 155.9, 139.2, 138.6, 135.3, 129.8, 129.4, 128.5, 128.4, 127.7, 127.4, 125.4, 117.6, 59.9, 19.5, 13.9; LRMS (EI, 70eV)  $m/z$  (%): 266 ( $M^+$ , 18), 221 (83), 192 (89), 178 (100); HRMS  $m/z$  (ESI) calcd for  $C_{18}H_{19}O_2$  ( $[M+H]^+$ ) 267.1380, found 267.1385.

**Ethyl-3-phenyl-3-(*m*-tolyl)acrylate (4oa):**



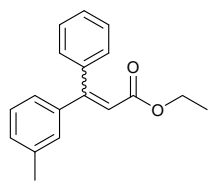

Yield: 74%, E/Z = 1:1; Yellow oil;  $^1\text{H NMR}$  (500 MHz,  $\text{CDCl}_3$ )  $\delta$  7.39-7.31 (m, 4H), 7.22-7.00 (m, 5H), 6.35 (s, 0.5H), 6.34 (s, 0.5H), 4.08-4.03 (m, 2H), 2.35 (s, 1.5H), 2.32 (s, 1.5H), 1.13-1.10 (m 3H);  $^{13}\text{C NMR}$  (125 MHz,  $\text{CDCl}_3$ )  $\delta$  166.2(2C), 156.7, 156.6, 129.1, 129.8, 128.8, 128.3(2C), 128.2, 127.8, 117.3(2C), 60.0, 21.40 (2C), 14.0; LRMS (EI, 70eV)  $m/z$  (%): 266 ( $\text{M}^+$ , 18), 221 (83), 192 (89), 178 (100); HRMS  $m/z$  (ESI) calcd for  $\text{C}_{18}\text{H}_{19}\text{O}_2$  ( $[\text{M}+\text{H}]^+$ ) 267.1380, found 267.1385.

**Ethyl-3-(3-chlorophenyl)-3-phenylacrylate (4pa):**

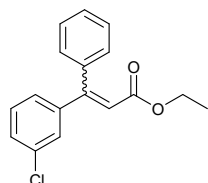

Yield: 65%, E/Z = 1.5:1; Yellow oil;  $^1\text{H NMR}$  (500 MHz,  $\text{CDCl}_3$ )  $\delta$  7.40-7.31 (m, 5H), 7.28-7.17 (m, 3H), 7.11-7.10 (m, 1H), 6.38 (s, 0.6H), 6.34 (s, 0.4H), 4.05 (m, 2H), 1.12 (m, 3H);  $^{13}\text{C NMR}$  (125 MHz,  $\text{CDCl}_3$ )  $\delta$  165.72 (2C), 154.8, 154.7, 142.7, 140.7, 140.0, 138.2, 134.4, 133.8, 129.6 (2C), 129.3, 129.1(2C), 129.0, 128.5, 128.4, 128.2, 128.1, 128.0, 127.3, 126.4, 118.6, 118.1, 60.2, 13.9; LRMS (EI, 70eV)  $m/z$  (%): 286 ( $\text{M}^+$ , 37), 241 (55), 214 (42), 178 (100); HRMS  $m/z$  (ESI) calcd for  $\text{C}_{17}\text{H}_{16}\text{O}_2\text{Cl}$  ( $[\text{M}+\text{H}]^+$ ) 287.0833, found 287.0833.

**Ethyl-3-phenyl-3-(*p*-tolyl)acrylate (4qa):**

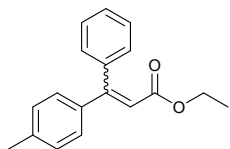

Yield: 73%, E/Z = 1:1; Yellow oil;  $^1\text{H NMR}$  (500 MHz,  $\text{CDCl}_3$ )  $\delta$  7.38-7.30 (m, 4H), 7.21-7.10 (m, 5H), 6.35 (s, 0.5H), 6.32 (s, 0.5H), 4.09-4.03 (m, 2H), 2.39 (s, 1.5H), 2.35 (s, 1.5H), 1.15 (t,  $J = 7.0$  Hz, 1.5H), 1.10 (t,  $J = 7.0$  Hz, 1.5H);  $^{13}\text{C NMR}$  (125 MHz,  $\text{CDCl}_3$ )  $\delta$  166.2, 166.1, 156.8, 156.5, 129.1, 129.0, 128.5, 128.3 (2C), 128.2, 127.8, 117.0, 116.4, 59.9 (2C), 21.4, 21.2,

14.0 (2C); LRMS (EI, 70eV)  $m/z$  (%): 266 ( $M^+$ , 88), 221 (100), 194 (80), 178 (72);

HRMS  $m/z$  (ESI) calcd for  $C_{18}H_{19}O_2$  ( $[M+H]^+$ ) 267.1380, found 267.1385.

**Ethyl-3-(4-methoxyphenyl)-3-phenylacrylate (4ra):**

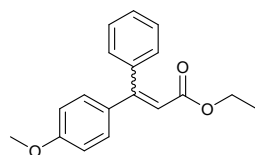

Yield: 76%, Red oil; E/Z = 1.5:1;  $^1H$  NMR (500 MHz,  $CDCl_3$ )

$\delta$  7.38-7.37 (m, 2H), 7.31 (m, 2H), 7.23-7.15 (m, 3H), 6.90 (d,  $J = 9.0$  Hz, 0.8H), 6.84 (d,  $J = 9.0$  Hz, 1.2H), 6.31 (s, 0.6H),

6.28 (s, 0.4H), 4.11-4.01 (m, 2H), 3.84 (s, 1.2H), 3.81 (s, 1.8H), 1.19-1.10 (m, 3H);

$^{13}C$  NMR (125 MHz,  $CDCl_3$ )  $\delta$  166.3, 160.7, 156.3, 139.2, 130.9, 129.7, 129.0, 128.5,

128.3, 127.9, 127.8, 116.8, 115.3, 113.7, 113.2, 60.0, 59.9, 55.3, 55.2, 14.1, 14.0; LRMS

(EI, 70eV)  $m/z$  (%): 282 ( $M^+$ , 94), 237 (69), 210 (100), 165 (68); HRMS  $m/z$  (ESI)

calcd for  $C_{18}H_{19}O_3$  ( $[M+H]^+$ ) 283.1329, found 283.1331.

**Ethyl-3-(4-fluorophenyl)-3-phenylacrylate (4sa):**

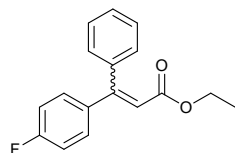

Yield: 45%, E/Z > 20:1; Yellow oil;  $^1H$  NMR (500 MHz,  $CDCl_3$ )

$\delta$  7.39-7.38 (m, 3H), 7.29-7.28 (m, 2H), 7.20-7.19 (m, 2H), 7.01 (t,  $J = 8.5$  Hz, 2H), 6.31 (s, 1H), 4.07-4.03 (m, 2H), 1.11 (t,  $J =$

7.0 Hz, 3H);  $^{13}C$  NMR (125 MHz,  $CDCl_3$ )  $\delta$  166.0, 164.5, 162.5, 155.4, 138.7, 136.9,

136.8, 130.2, 130.1, 129.0, 128.2, 127.9, 117.2, 115.5, 115.3, 60.1, 13.9;  $^{19}F$  NMR

(471 MHz,  $CDCl_3$ )  $\delta$  -111.7; LRMS (EI, 70eV)  $m/z$  (%): 270 ( $M^+$ , 68), 225 (100), 196

(81), 177 (22); HRMS  $m/z$  (ESI) calcd for  $C_{17}H_{16}O_2F$  ( $[M+H]^+$ ) 271.1129, found

271.1129.

**Ethyl 3,3-diphenylacrylate (4ta):**

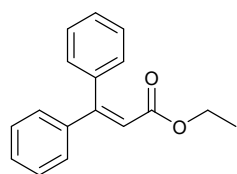

Yield: 75%, Yellow oil;  $^1\text{H NMR}$  (500 MHz,  $\text{CDCl}_3$ )  $\delta$  7.31-7.28 (m, 4H), 7.26-7.21 (m, 4H), 7.14-7.13 (m, 2H), 6.29 (s, 1H), 3.97 (m, 2H), 1.03 (t,  $J = 7.0$  Hz, 3H);  $^{13}\text{C NMR}$  (125 MHz,  $\text{CDCl}_3$ )  $\delta$  166.1, 156.5, 140.7, 138.9, 129.1, 128.3, 128.2, 127.8, 117.4, 60.0, 13.9; LRMS (EI, 70eV)  $m/z$  (%): 252 ( $\text{M}^+$ , 77), 207 (98), 178 (100), 152 (23); HRMS  $m/z$  (ESI) calcd for  $\text{C}_{17}\text{H}_{17}\text{O}_2$  ( $[\text{M}+\text{H}]^+$ ) 253.1223, found 253.1224.

**Ethyl 3,3-di-*p*-tolylacrylate (4ua):**

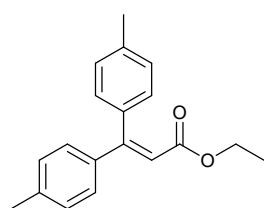

Yield: 69%, Yellow oil;  $^1\text{H NMR}$  (500 MHz,  $\text{CDCl}_3$ )  $\delta$  7.19 (t,  $J = 7.0$  Hz, 4H), 7.13-7.09 (m, 4H), 6.30 (s, 1H), 4.09-4.04 (m, 2H), 2.39 (s, 3H), 2.35 (s, 3H), 1.15 (t,  $J = 7.0$  Hz, 3H);  $^{13}\text{C NMR}$  (125 MHz,  $\text{CDCl}_3$ )  $\delta$  166.3, 156.9, 139.6, 138.2, 137.9, 136.1, 129.1, 128.5, 128.3, 116.1, 59.9, 21.4, 21.2, 14.1; LRMS (EI, 70eV)  $m/z$  (%): 280 ( $\text{M}^+$ , 88), 235 (87), 208 (100), 193 (49); HRMS  $m/z$  (ESI) calcd for  $\text{C}_{19}\text{H}_{21}\text{O}_2$  ( $[\text{M}+\text{H}]^+$ ) 281.1536, found 281.1531.

**Ethyl 3,3-bis(4-fluorophenyl)acrylate (4va):**

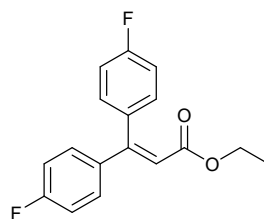

Yield: 38%, Yellow solid;  $^1\text{H NMR}$  (500 MHz,  $\text{CDCl}_3$ )  $\delta$  7.28-7.25 (m, 2H), 7.20-7.17 (m, 2H), 7.09-7.06 (m, 2H), 7.03-7.00 (m, 2H), 6.30 (s, 1H), 4.09-4.05 (m, 2H), 1.15 (t,  $J = 7.0$  Hz, 3H);  $^{13}\text{C NMR}$  (125 MHz,  $\text{CDCl}_3$ )  $\delta$  165.8, 164.5, 163.7, 162.5, 161.7, 154.4, 134.5, 131.0 (2H), 130.2, 130.1, 117.5, 115.5, 115.4, 115.1, 114.9, 60.1, 14.0;  $^{19}\text{F NMR}$  (471 MHz,  $\text{CDCl}_3$ )  $\delta$  -111.4, -113.2; LRMS (EI, 70eV)  $m/z$  (%): 288 ( $\text{M}^+$ , 62), 243 (100),

214 (72), 123 (42); HRMS  $m/z$  (ESI) calcd for  $C_{17}H_{15}O_2F_2$  ( $[M+H]^+$ ) 289.1035, found 289.1031.

**Ethyl 3,3-bis(4-methoxyphenyl)acrylate (4wa):**

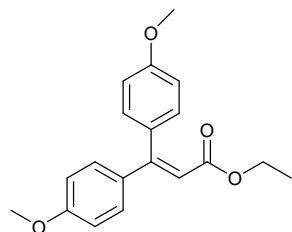

Yield: 89%, Yellow oil;  $^1H$  NMR (500 MHz,  $CDCl_3$ )  $\delta$  7.24 (d,  $J = 8.5$  Hz, 2H), 7.15 (d,  $J = 8.5$  Hz, 2H), 6.90 (d,  $J = 8.5$  Hz, 2H), 6.83 (d,  $J = 9.0$  Hz, 2H), 6.22 (s, 1H), 4.09-4.05 (m, 2H), 3.83 (s, 3H), 3.80 (s, 3H), 1.15 (t,  $J = 7.0$  Hz, 3H);  $^{13}C$  NMR (125 MHz,  $CDCl_3$ )  $\delta$  166.3, 160.6, 159.6, 156.3, 133.7, 131.2, 130.8, 129.9, 114.8, 113.6, 113.1, 59.7, 55.2, 55.1, 14.1; LRMS (EI, 70eV)  $m/z$  (%): 312 ( $M^+$ , 81), 240 (100), 225 (51), 135 (98); HRMS  $m/z$  (ESI) calcd for  $C_{19}H_{21}O_4$  ( $[M+H]^+$ ) 313.1434, found 313.1431.

**Ethyl (*E*)-3-(4-methoxyphenyl)-2-methylacrylate (4xa):**

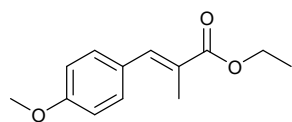

Yield: 40%, Yellow oil;  $^1H$  NMR (500 MHz,  $CDCl_3$ )  $\delta$  7.64 (s, 1H), 7.39 (d,  $J = 8.0$  Hz, 2H), 6.93 (d,  $J = 8.0$  Hz, 2H), 4.29-4.24 (m, 2H), 3.84 (s, 3H), 2.13 (s, 3H), 1.35 (t,  $J = 7.0$  Hz, 3H);  $^{13}C$  NMR (125 MHz,  $CDCl_3$ )  $\delta$  169.0, 159.6, 138.3, 131.4, 128.5, 126.4, 113.8, 60.7, 55.3, 14.3, 14.1; LRMS (EI, 70eV)  $m/z$  (%): 220 ( $M^+$ , 100), 175 (52), 146 (78), 115 (30); HRMS  $m/z$  (ESI) calcd for  $C_{13}H_{17}O_3$  ( $[M+H]^+$ ) 221.1172, found 221.1170.

**Ethyl (*E*)-2-methyl-3-(2,4,5-trimethoxyphenyl)acrylate (4ya):**

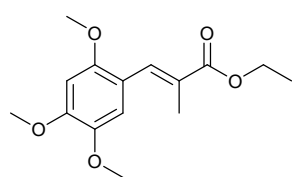

Yield: 47%, Yellow oil;  $^1H$  NMR (500 MHz,  $CDCl_3$ )  $\delta$  7.81 (s, 1H), 6.90 (s, 1H), 6.54 (s, 1H), 4.29-4.24 (m, 2H), 3.93 (s, 3H), 3.85 (s, 6H), 2.08 (s, 3H), 1.35 (t,  $J = 7.0$  Hz, 3H);  $^{13}C$  NMR (125 MHz,  $CDCl_3$ )  $\delta$  168.8, 152.7, 150.3, 142.4, 134.1, 126.9, 116.3, 113.8,

96.9, 60.6, 56.6, 56.3, 56.0, 14.3 (2C); LRMS (EI, 70eV)  $m/z$  (%): 280 ( $M^+$ , 100), 249 (23), 221 (36), 205 (29); HRMS  $m/z$  (ESI) calcd for  $C_{15}H_{21}O_5$  ( $[M+H]^+$ ) 281.1384, found 281.1381.

**Ethyl-(*E*)-3-((*R*)-2,5,7,8-tetramethyl-2-((4*R*,8*R*)-4,8,12-trimethyltridecyl)chroman-6-yl)acrylate (4za):**

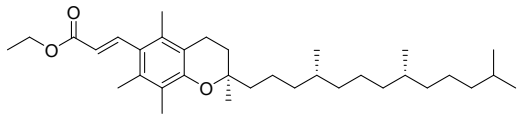  
Yield: 61%, Yellow oil;  $^1H$  NMR (500 MHz,  $CDCl_3$ )  $\delta$  7.88 (d,  $J = 16.5$  Hz, 1H), 5.89 (d,  $J = 16.5$  Hz, 1H), 4.29-4.25 (m, 2H), 2.62 (t,  $J = 6.5$  Hz, 2H), 2.22 (s, 3H), 2.18 (s, 3H), 2.12 (s, 3H), 1.86-1.76 (m, 2H), 1.66 (s, 1H), 1.59-1.50 (m, 4H), 1.34 (t,  $J = 7.5$  Hz, 6H), 1.26 (s, 6H), 1.16-1.12 (m, 4H), 1.09-1.05 (m, 4H), 0.87-0.84 (m, 14H);  $^{13}C$  NMR (125 MHz,  $CDCl_3$ )  $\delta$  167.1, 151.8, 145.4, 133.5, 132.2, 126.1, 123.4, 122.7, 117.2, 75.3, 60.3, 40.0, 39.3, 37.4 (2C), 37.3, 32.8, 32.7, 31.2, 28.0, 24.8, 24.4, 23.9, 22.7, 22.6, 21.0, 20.7, 19.7, 19.6, 17.3, 16.4, 14.3, 11.8; HRMS  $m/z$  (ESI) calcd for  $C_{34}H_{57}O_3$  ( $[M+H]^+$ ) 513.4302, found 513.4300.

**Cyclopenta[*a*]phenanthren-2-yl)-3-phenylacrylate (4aaa):**

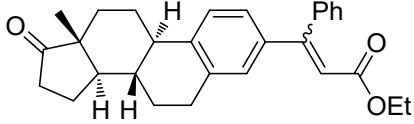  
Yield: 55%, E/Z = 1.6:1; Yellow oil;  $^1H$  NMR (500 MHz,  $CDCl_3$ )  $\delta$  7.39 (s, 2H), 7.33-7.32 (m, 2H), 7.24 (s, 1H), 7.21 (s, 1H), 7.09-7.01 (m, 1H), 6.36-6.31 (m, 1H), 4.11-4.02 (m, 2H), 2.87 (d,  $J = 6.0$  Hz, 2H), 2.54-2.49 (m, 1H), 2.42-2.30 (m, 2H), 2.20-2.12 (m, 2H), 2.03-1.96 (m, 2H), 1.68-1.58 (m, 4H), 1.55-1.44 (m, 3H), 1.17 (t,  $J = 7.0$  Hz, 1H), 1.12 (t,  $J = 7.0$  Hz, 2H), 0.94-0.91 (m, 3H);  $^{13}C$  NMR (125 MHz,  $CDCl_3$ )  $\delta$  220.8, 220.6, 166.1 (2C), 156.7, 156.4, 141.4, 141.2, 139.6, 139.0, 138.1, 136.5, 136.1, 135.7, 129.6,

129.2, 129.0, 128.7, 128.3, 128.2, 127.9, 127.7, 126.7, 125.7, 125.3, 124.6, 117.1, 116.6, 60.3, 59.9, 50.5, 50.4, 47.9, 47.8, 44.4, 37.9 (2C), 35.8, 35.7, 31.5 (2C), 29.3, 29.2, 26.4, 26.3, 25.5, 21.5 (2C), 21.0, 14.1, 14.0, 13.9, 13.8, 13.7; HRMS  $m/z$  (ESI) calcd for  $C_{29}H_{33}O_3$  ( $[M+H]^+$ ) 429.2424, found 429.2428.

**Decahydro-6H-cyclopenta[*a*]phenanthren-2-yl)acrylate (4baa):**

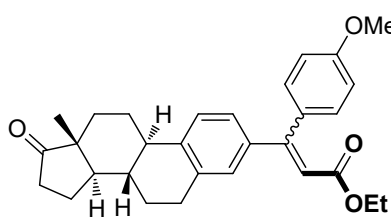 Yield: 65%, *E/Z* =1:1; Yellow oil;  $^1H$  NMR (500 MHz,  $CDCl_3$ )  $\delta$  7.29-7.27 (m, 1H), 7.24-7.23 (m, 1H), 7.15 (d,  $J$  = 9.0 Hz, 1H), 7.08-6.99 (m, 2H), 6.90 (d,  $J$  = 8.5 Hz, 1H), 6.83 (d,  $J$  = 8.5 Hz, 1H), 6.26 (d,  $J$  = 6.0 Hz, 1H), 4.10-4.04 (m, 2H), 3.82 (s, 3H), 2.87 (m, 2H), 2.53-2.47 (m, 2H), 2.40-2.29 (m, 2H), 2.16-2.05 (m, 4H), 1.67-1.58 (m, 4H), 1.53-1.49 (m, 1H), 1.18-1.13 (m, 3H), 0.92 (s, 3H);  $^{13}C$  NMR (125 MHz,  $CDCl_3$ )  $\delta$  220.8, 220.6, 166.2, 160.6, 159.5, 156.5 (2C), 141.3, 139.5, 138.8, 136.4, 135.7, 133.4, 131.0, 130.7, 129.8, 129.5, 128.9, 126.7, 125.9, 125.2, 124.5, 116.0, 115.0, 113.6, 113.1, 59.8, 59.7, 55.2, 55.1, 50.5, 50.4, 47.9, 47.8, 44.4, 37.9 (2C), 35.8, 35.7, 31.5 (2C), 29.3, 29.2, 26.4, 26.3, 25.5, 21.5, 14.0 (2C), 13.8, 13.7; HRMS  $m/z$  (ESI) calcd for  $C_{30}H_{35}O_4$  ( $[M+H]^+$ ) 459.2530, found 459.2533.

**4-(3-Ethoxy-3-oxo-1-phenylprop-1-en-1-yl)benzyl-(4R)-4-((5S,8R,9S,10S,13R,14S)-10,13-dimethyl-3,7,12-trioxohexadecahydro-1H-cyclopenta[*a*]phenanthren-17-**

**yl)pentanoate (4caa):**

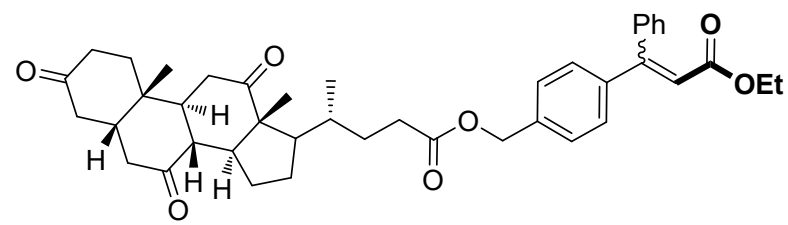 Yield: 55%, *E/Z* =1:1; Yellow oil;  $^1H$  NMR (500 MHz,  $CDCl_3$ )  $\delta$

7.80-7.71 (m, 2H), 7.55-7.50 (m, 1H), 7.42-7.36 (m, 2H), 7.33-7.29 (m, 2H), 7.21 (d,  $J = 8.5$  Hz, 2H), 6.36 (s, 1H), 5.16 (s, 1H), 5.11 (s, 1H), 4.29-4.20 (m, 2H), 4.06-4.03 (m, 2H), 2.91-2.84 (m, 3H), 2.32-2.12 (s, 10H), 2.04-2.01 (m, 2H), 1.94-1.91 (m, 2H), 1.78-1.68 (m, 2H), 1.46-1.38 (m, 6H), 1.13-1.03 (m, 4H), 0.86 (s, 3H);  $^{13}\text{C}$  NMR (125 MHz,  $\text{CDCl}_3$ )  $\delta$  211.9, 209.0, 208.7, 173.8, 173.7, 167.7, 166.0, 156.8, 156.1, 155.8, 140.6, 140.6, 138.7, 137.3, 135.9, 130.9, 129.4, 129.3, 129.0, 128.8, 128.4, 128.3, 128.2, 128.1, 128.1, 127.9, 127.52, 117.8, 117.6, 66.2, 65.8, 65.45, 65.3, 60.0, 56.8, 51.7, 49.0, 48.9, 46.8, 45.6, 45.6, 45.5, 44.9, 42.7, 38.6, 36.4, 36.0, 35.4, 35.4, 35.2, 33.9, 33.4, 31.5, 31.4, 30.4, 29.6, 27.6, 25.6, 25.4, 25.1, 24.9, 24.7, 21.8, 18.6, 14.6, 14.2, 14.4, 13.9, 11.8; HRMS  $m/z$  (ESI) calcd for  $\text{C}_{42}\text{H}_{51}\text{O}_7$  ( $[\text{M}+\text{H}]^+$ ) 677.3629, found 677.3641.

**(*E*)-3-(4-Methoxyphenyl)acrylaldehyde (5a)<sup>16</sup>:**

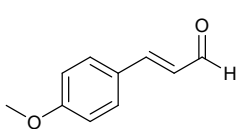

Yield: 64%, Yellow oil;  $^1\text{H}$  NMR (500 MHz,  $\text{CDCl}_3$ )  $\delta$  9.65 (d,  $J = 8.0$  Hz, 1H), 7.54-7.52 (m, 2H), 7.43 (d,  $J = 16.0$  Hz, 1H), 6.96-6.93 (m, 2H), 6.64-6.60 (m, 1H), 3.87 (s, 3H);  $^{13}\text{C}$  NMR (125 MHz,  $\text{CDCl}_3$ )  $\delta$  193.8, 162.2, 152.8, 130.3, 126.7, 126.5, 114.5, 55.4; LRMS (EI, 70eV)  $m/z$  (%): 162 ( $\text{M}^+$ , 100), 131 (78), 91 (57), 89 (36); HRMS  $m/z$  (ESI) calcd for  $\text{C}_{10}\text{H}_{11}\text{O}_2$  ( $[\text{M}+\text{H}]^+$ ) 163.0754, found 163.0757.

**(*E*)-3-(4-Ethoxyphenyl)acrylaldehyde (5b):**

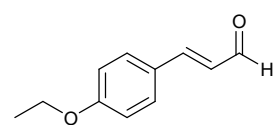

Yield: 69%, Yellow oil;  $^1\text{H}$  NMR (500 MHz,  $\text{CDCl}_3$ )  $\delta$  9.64 (d,  $J = 8.0$  Hz, 1H), 7.51 (d,  $J = 9.0$  Hz, 2H), 7.42 (d,  $J = 16.0$  Hz, 1H), 6.93 (d,  $J = 9.0$  Hz, 2H), 6.63-6.58 (m, 1H), 4.10-4.06 (m, 2H), 1.44 (d,  $J = 7.0$

Hz, 3H);  $^{13}\text{C}$  NMR (125 MHz,  $\text{CDCl}_3$ )  $\delta$  193.7, 161.6, 152.8, 130.3, 126.5, 126.3, 115.0, 63.7, 14.6; LRMS (EI, 70eV)  $m/z$  (%): 176 ( $\text{M}^+$ , 100), 147 (98), 131 (58), 91 (44); HRMS  $m/z$  (ESI) calcd for  $\text{C}_{11}\text{H}_{13}\text{O}_2$  ( $[\text{M}+\text{H}]^+$ ) 177.0910, found 177.0910.

**(E)-3-(2-Methoxyphenyl)acrylaldehyde (5c)<sup>16</sup>:**

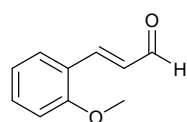

Yield: 53%, Yellow oil;  $^1\text{H}$  NMR (500 MHz,  $\text{CDCl}_3$ )  $\delta$  9.69 (d,  $J = 8.0$  Hz, 1H), 7.84 (d,  $J = 16.0$  Hz, 1H), 7.56-7.54 (m, 1H), 7.43-7.40 (m, 1H), 7.00 (t,  $J = 7.5$  Hz, 1H), 6.95 (d,  $J = 8.0$  Hz, 1H), 6.82-6.77 (m, 1H), 3.91 (s, 3H);  $^{13}\text{C}$  NMR (125 MHz,  $\text{CDCl}_3$ )  $\delta$  194.6, 158.2, 148.3, 132.7, 129.0, 128.8, 122.9, 120.8, 111.2, 55.51 (s); LRMS (EI, 70eV)  $m/z$  (%): 162 ( $\text{M}^+$ , 38), 131 (100), 119 (31), 91 (59); HRMS  $m/z$  (ESI) calcd for  $\text{C}_9\text{H}_8\text{O}_2$  ( $[\text{M}+\text{H}]^+$ ) 163.0754, found 163.0754.

**3-(Naphthalen-2-yl)-3-phenylacrylaldehyde (5d):**

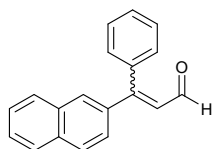

Yield: 49%,  $E:Z = 1.5:1$ ; Yellow solid;  $^1\text{H}$  NMR (500 MHz,  $\text{CDCl}_3$ )  $\delta$  9.59-9.56 (m, 1H), 7.95-7.71 (m, 5H), 7.57-7.48 (m, 4H), 7.39-7.31 (m, 3H), 6.74 (d,  $J = 8.0$ , 0.6H), 6.69 (d,  $J = 8.0$ , 0.4H);  $^{13}\text{C}$  NMR (125 MHz,  $\text{CDCl}_3$ )  $\delta$  193.5, 162.3, 162.1, 130.8 (2C), 129.6, 129.5, 128.8 (2C), 128.6, 128.4, 128.3, 128.11, 127.8, 127.7, 127.6 (3C), 127.5, 126.7, 125.0; LRMS (EI, 70eV)  $m/z$  (%): 258 ( $\text{M}^+$ , 100), 229 (64), 128 (42), 102 (37); HRMS  $m/z$  (ESI) calcd for  $\text{C}_{19}\text{H}_{15}\text{O}$  ( $[\text{M}+\text{H}]^+$ ) 259.1117, found 259.1118.

**3,3-diphenylacrylaldehyde (5e)<sup>16</sup>:**

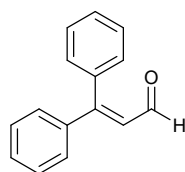

Yield: 56%, Yellow oil;  $^1\text{H}$  NMR (500 MHz,  $\text{CDCl}_3$ )  $\delta$  9.53 (d,  $J = 7.5$  Hz, 1H), 7.5-7.4 (m, 5H), 7.4-7.3 (m, 5H), 6.61 (d,  $J = 8.0$  Hz, 1H);  $^{13}\text{C}$  NMR (125 MHz,  $\text{CDCl}_3$ )  $\delta$  193.6, 162.3, 139.7, 136.6, 130.7, 130.5, 129.5, 128.7, 128.6; 128.3, 127.2; LRMS (EI, 70eV)  $m/z$  (%): 208 ( $\text{M}^+$ ,



78), 207 (100), 178 (56), 102 (51); HRMS  $m/z$  (ESI) calcd for  $C_{15}H_{13}O$  ( $[M+H]^+$ ) 209.0961, found 209.0961.

### 3,3-Di-*p*-tolylacrylaldehyde (5f):

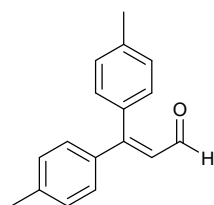

Yield: 57%, Yellow oil;  $^1H$  NMR (500 MHz,  $CDCl_3$ )  $\delta$  9.51 (d,  $J = 8.0$  Hz, 1H), 7.27-7.24 (m, 4H), 7.20-7.17 (m, 4H), 6.55 (d,  $J = 8.0$  Hz, 1H), 2.43 (s, 3H), 2.38 (s, 3H);  $^{13}C$  NMR (125 MHz,  $CDCl_3$ )  $\delta$  193.8, 162.6, 140.9, 139.6, 137.1, 133.9, 130.8, 129.3, 128.9, 128.7, 126.4, 21.4, 21.3; LRMS (EI, 70eV)  $m/z$  (%): 236 ( $M^+$ , 28), 221 (100), 178 (19), 115 (33); HRMS  $m/z$  (ESI) calcd for  $C_{17}H_{17}O$  ( $[M+H]^+$ ) 237.1274, found 237.1272.

### 3,3-Bis(4-fluorophenyl)acrylaldehyde (5g):

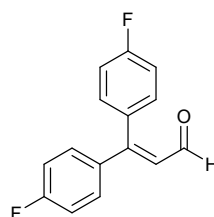

Yield: 34%, Yellow oil;  $^1H$  NMR (500 MHz,  $CDCl_3$ )  $\delta$  9.50 (d,  $J = 8.0$  Hz, 1H), 7.36-7.28 (m, 4H), 7.19-7.15 (m, 2H), 7.10-7.07 (m, 2H), 6.54 (d,  $J = 8.0$  Hz, 1H);  $^{13}C$  NMR (125 MHz,  $CDCl_3$ )  $\delta$  192.9, 165.2, 164.5, 163.2, 162.5, 159.8, 135.7, 132.6, 132.5, 130.7, 127.3, 115.9, 115.8, 115.6;  $^{19}F$  NMR (471 MHz,  $CDCl_3$ )  $\delta$  -109.3, -110.6; LRMS (EI, 70eV)  $m/z$  (%): 244 ( $M^+$ , 84), 243 (85), 214 (44), 120 (100); HRMS  $m/z$  (ESI) calcd for  $C_{15}H_{11}OF_2$  ( $[M+H]^+$ ) 245.0772, found 245.0770.

### 3-(4-Bromophenyl)-3-phenylacrylaldehyde (5h):

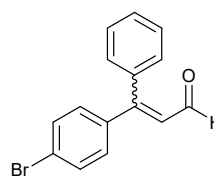

Yield: 48%,  $E/Z = 1.5:1$ ; Yellow oil;  $^1H$  NMR (500 MHz,  $CDCl_3$ )  $\delta$  9.54-9.51 (m, 1H), 7.60 (d,  $J = 8.0$  Hz, 1H), 7.52-7.38 (m, 4H), 7.35-7.26 (m, 2H), 7.23-7.19 (m, 2H), 6.61-6.56 (m, 1H);  $^{13}C$  NMR (125 MHz,  $CDCl_3$ )  $\delta$  193.3, 192.9, 161.0, 160.9, 139.2, 138.6, 136.1, 135.5,

132.2, 131.9, 131.7, 130.7 (2C), 130.1, 129.7, 128.7, 128.6, 128.5, 127.5, 127.3, 125.1, 124.0; LRMS (EI, 70eV)  $m/z$  (%): 286 ( $M^+$ , 45), 207 (65), 178 (100), 102 (52); HRMS  $m/z$  (ESI) calcd for  $C_{15}H_{12}OBr$  ( $[M+H]^+$ ) 287.0066, found 287.0069.

**3-(4-Methoxyphenyl)-3-(13-methyl-17-oxo-7,8,9,11,12,13,14,15,16,17-decahydro-6H-cyclopenta[*a*]phenanthren-2-yl)acrylaldehyde (5i):**

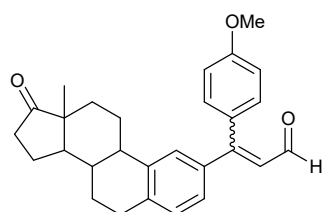

Yield: 58%,  $E/Z$  = 2:1, Yellow oil;  $^1H$  NMR (500 MHz,  $CDCl_3$ )  $\delta$  9.53-9.48 (m, 1H), 7.34-7.32 (m, 2H), 7.24 (d,  $J$  = 8.5 Hz, 1H), 7.11-7.03 (m, 2H), 6.96 (d,  $J$  = 8.5 Hz, 1H), 6.88 (d,  $J$  = 9.0 Hz, 1H), 6.53-6.50 (m, 1H), 3.88 (s, 1H), 3.84 (s, 2H), 2.94-2.90 (m, 2H), 2.56-2.48 (m, 2H), 2.22-2.11 (m, 2H), 2.06-1.99 (m, 2H), 1.70-1.46 (m, 7H), 0.96 (s, 2H), 0.92 (s, 1H);  $^{13}C$  NMR (125 MHz,  $CDCl_3$ )  $\delta$  220.6 (2C), 193.7, 193.6, 162.2 (2C), 161.6, 160.7, 142.6, 141.2, 137.7, 136.8, 136.5, 134.3, 132.5, 132.1, 131.3, 130.4, 129.4, 129.0, 128.3, 126.5, 126.4, 125.6, 125.5, 125.2, 113.9, 113.6, 55.4, 50.5 (2C), 47.9 (2C), 44.5, 44.4, 38.0 (2C), 35.8, 31.5, 29.7, 29.3 (2C), 26.3 (2C), 25.6 (2C), 21.6, 14.1, 13.8 (2C); HRMS  $m/z$  (ESI) calcd for  $C_{28}H_{31}O_3$  ( $[M+H]^+$ ) 415.2268, found 415.2265.

## (E) Spectra

### 1-Methoxy-4-(3,3,3-trichloro-1-(methoxy-D3)propyl)benzene (6b-D3):

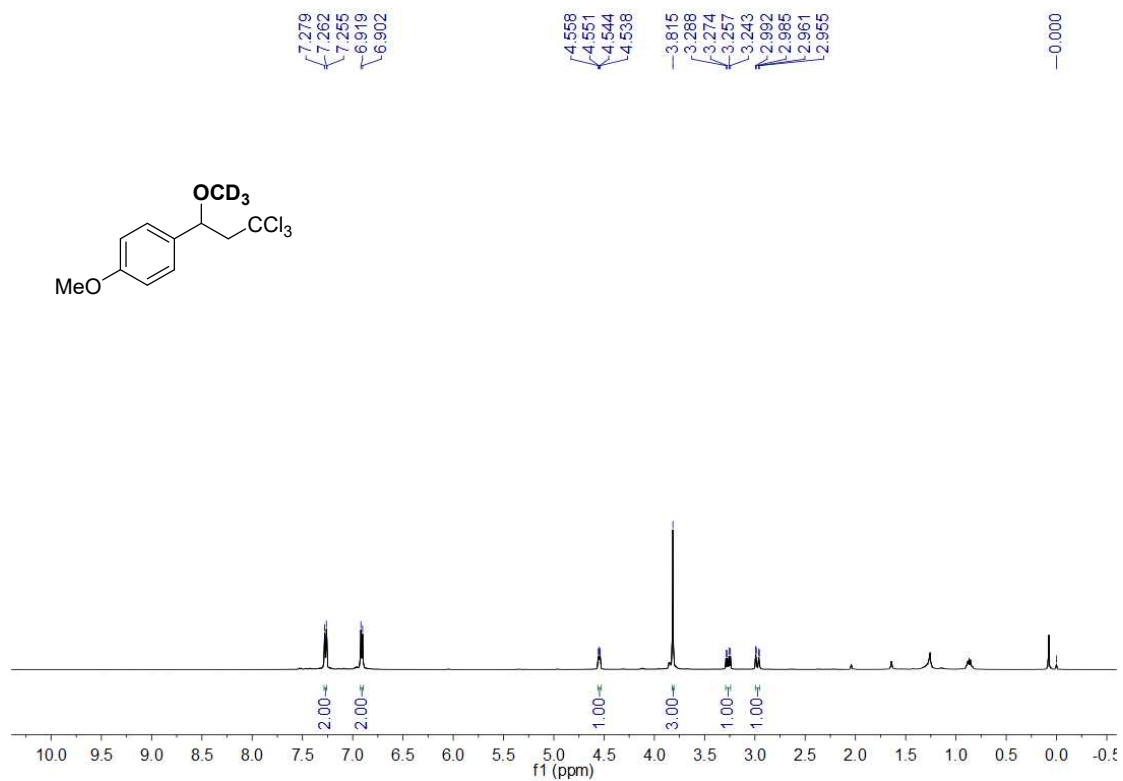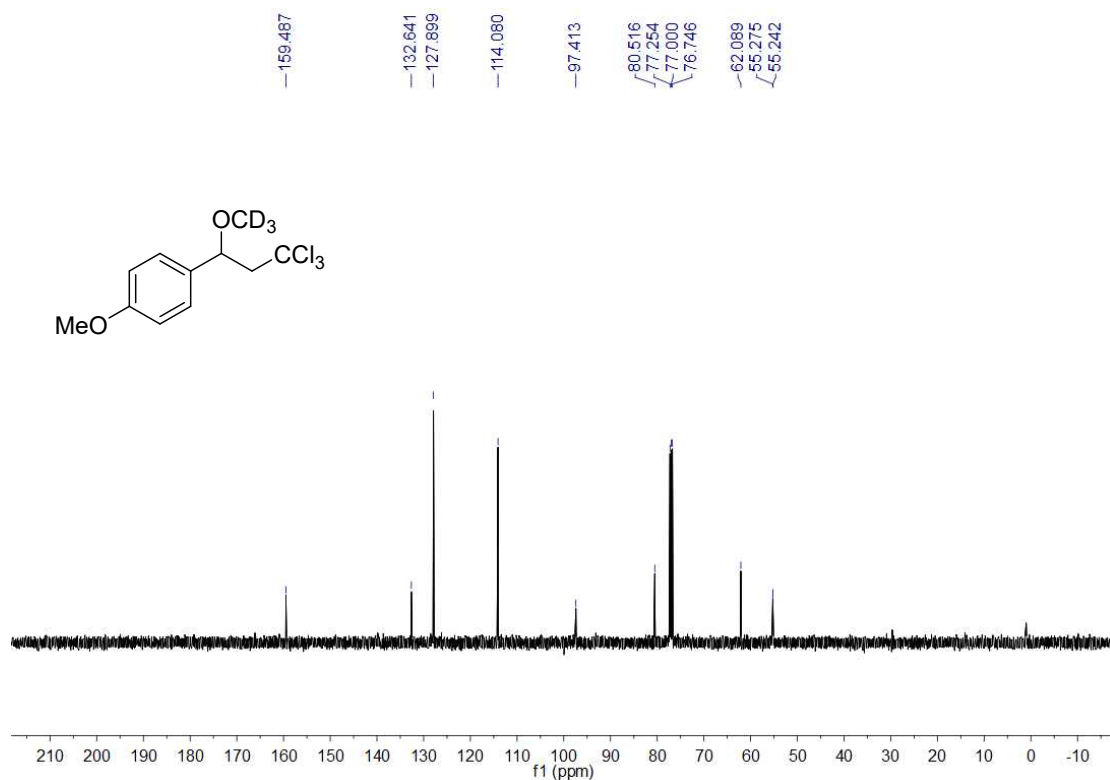

### Methyl-D3 (*E*)-3-(4-methoxyphenyl)acrylate (4ab-D3):

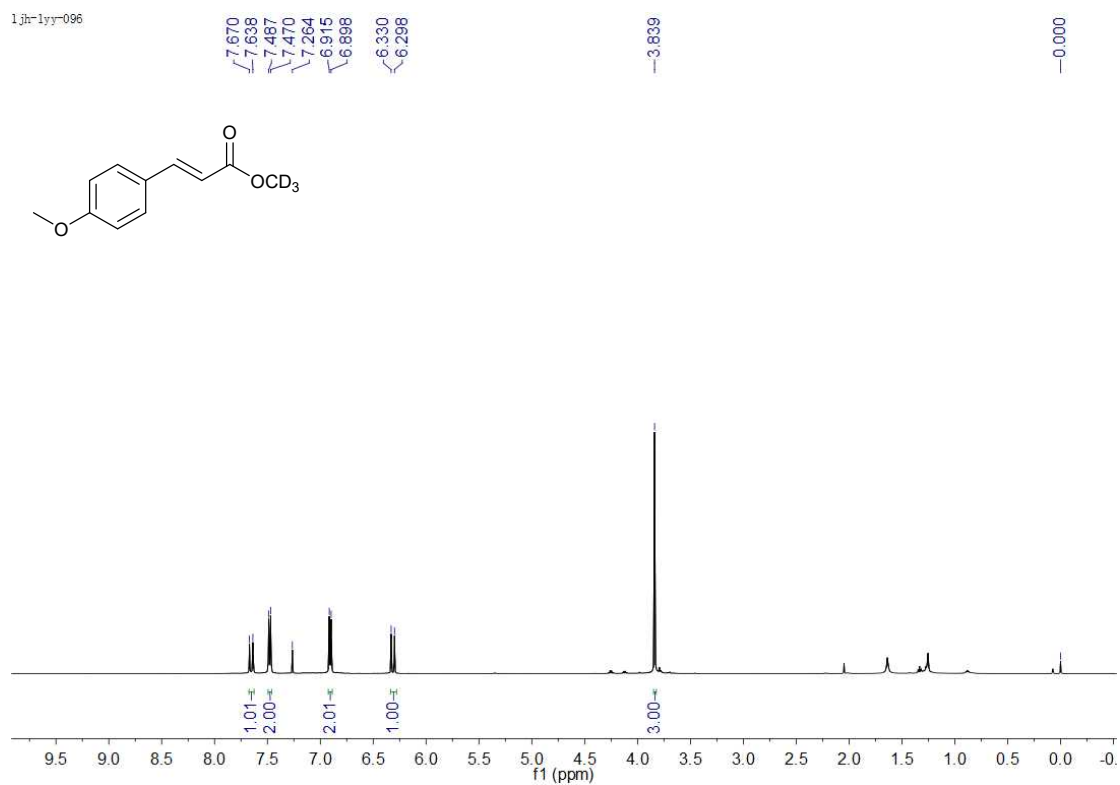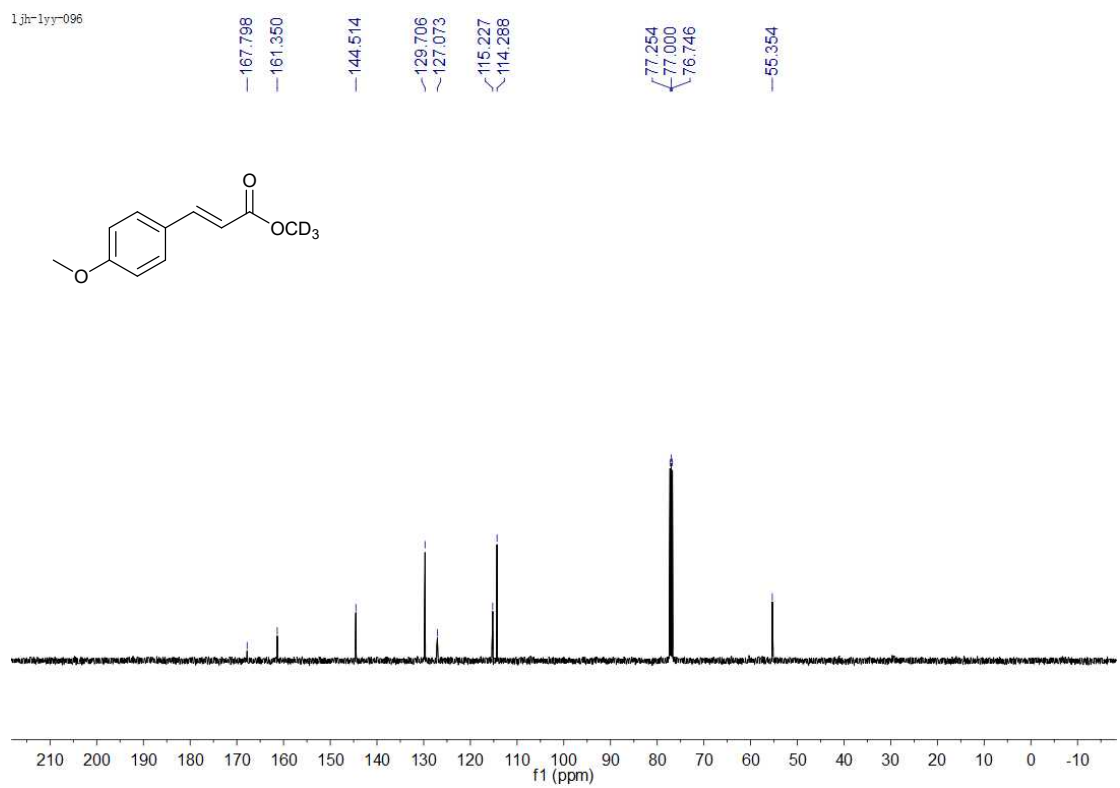

# Ethyl (*E*)-3-(4-methoxyphenyl)acrylate (4aa):

2019228-1jh-1yy-005

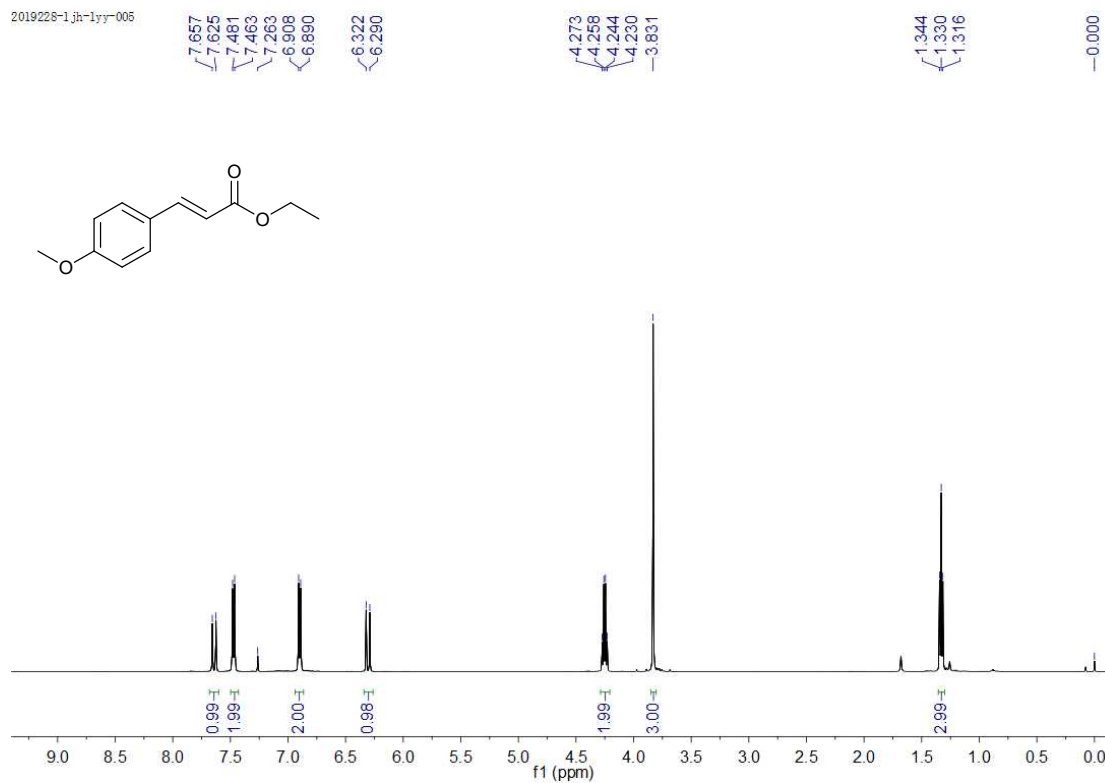

2019228-1jh-1yy-005

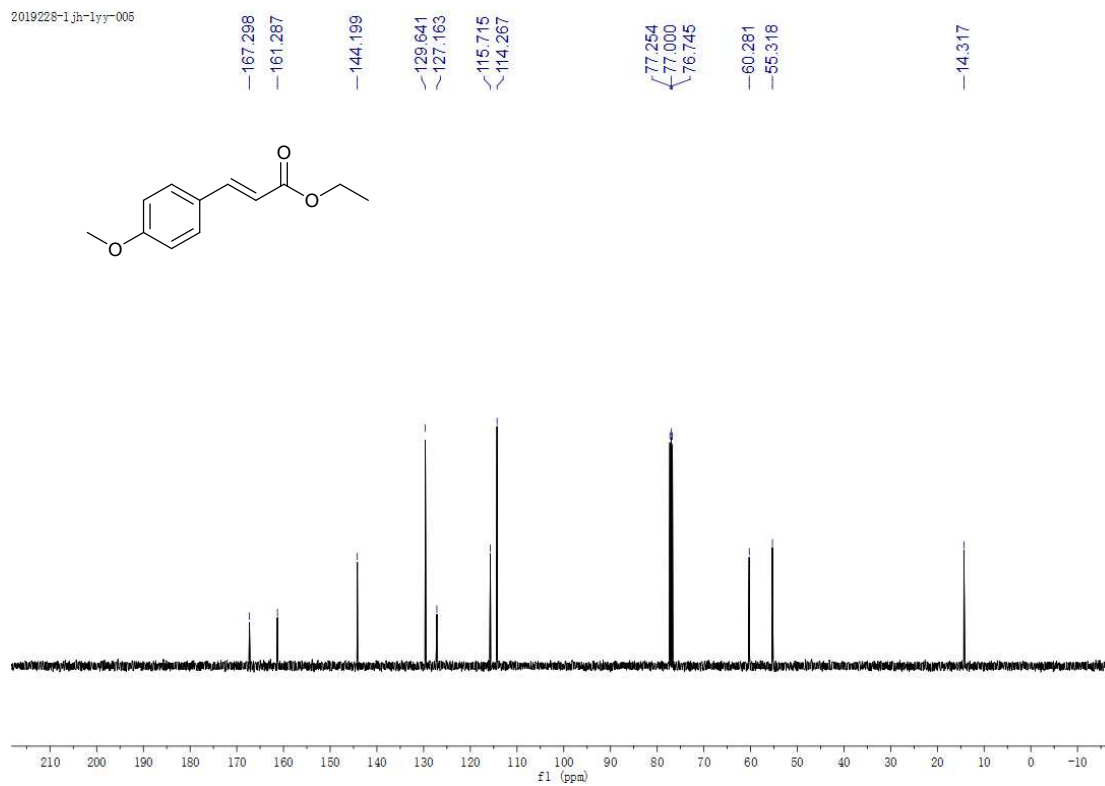

# Methyl (*E*)-3-(4-methoxyphenyl)acrylate (4ab):

20190331-1jh-1yy-022

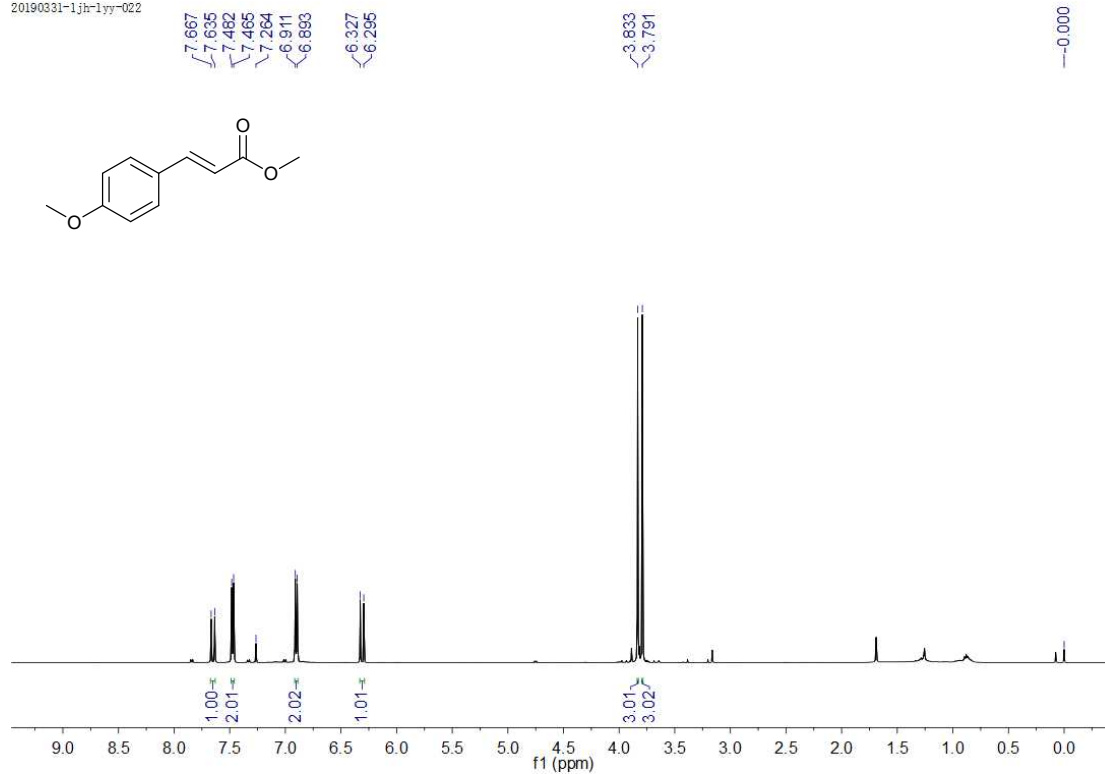

20190331-1jh-1yy-022

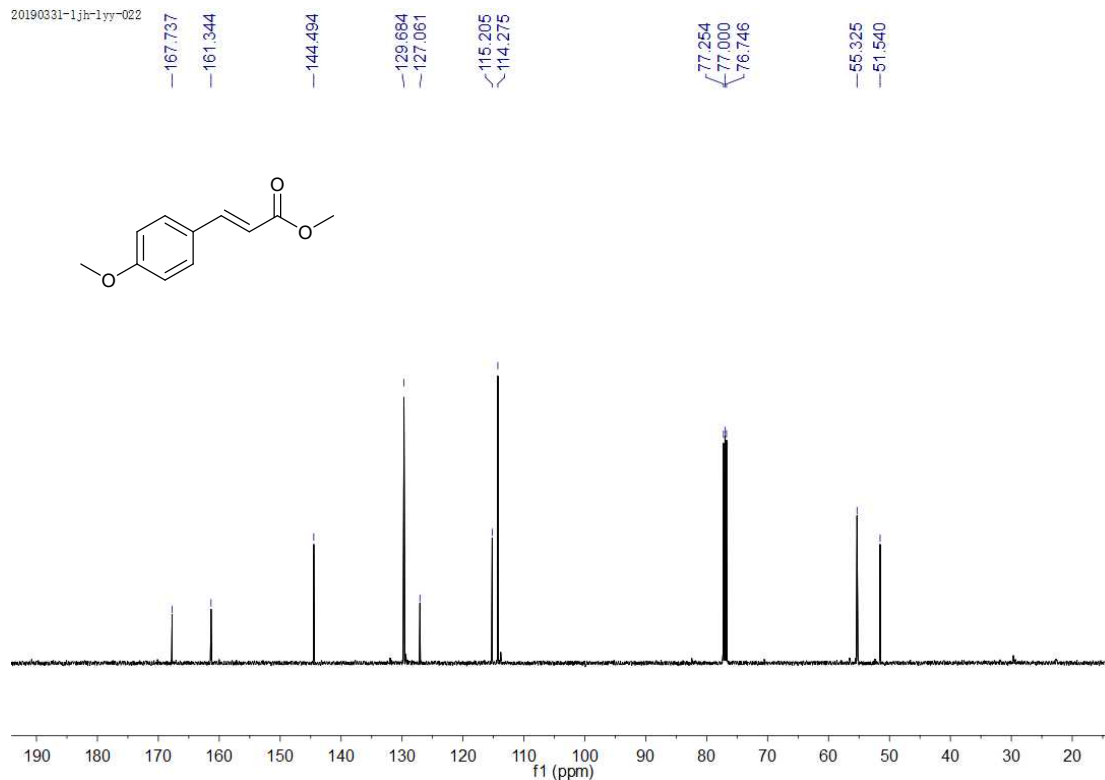

# Butyl (E)-3-(4-methoxyphenyl)acrylate (4ac):

20190401-1jh-1yy-022

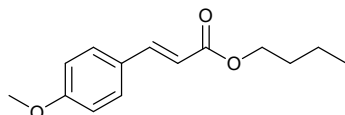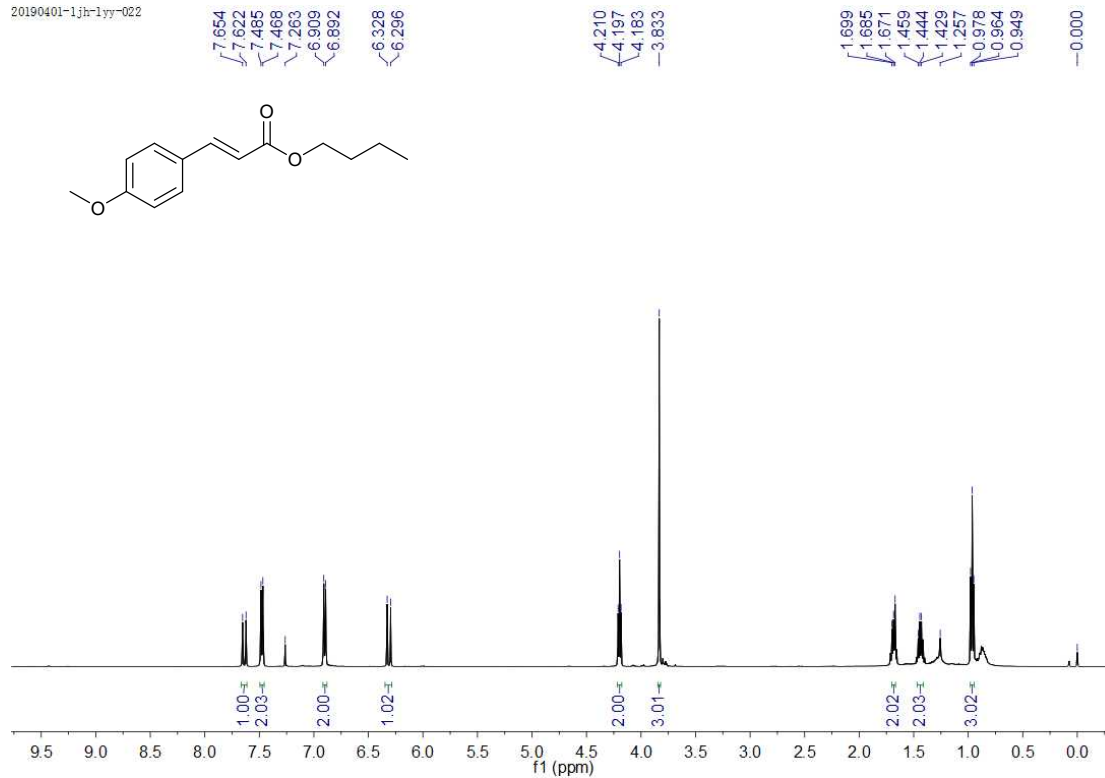

20190401-1jh-1yy-022

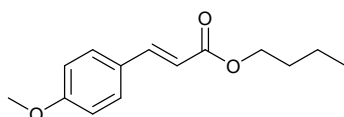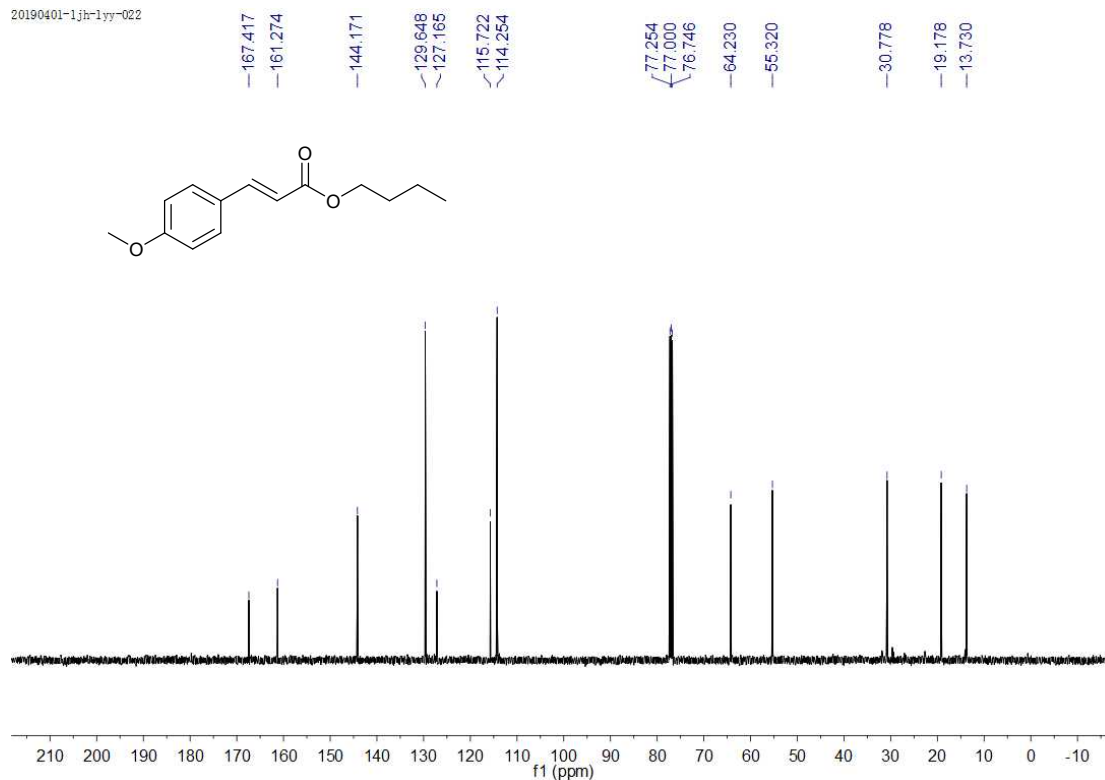

### Dodecyl (*E*)-3-(4-methoxyphenyl)acrylate (4ad):

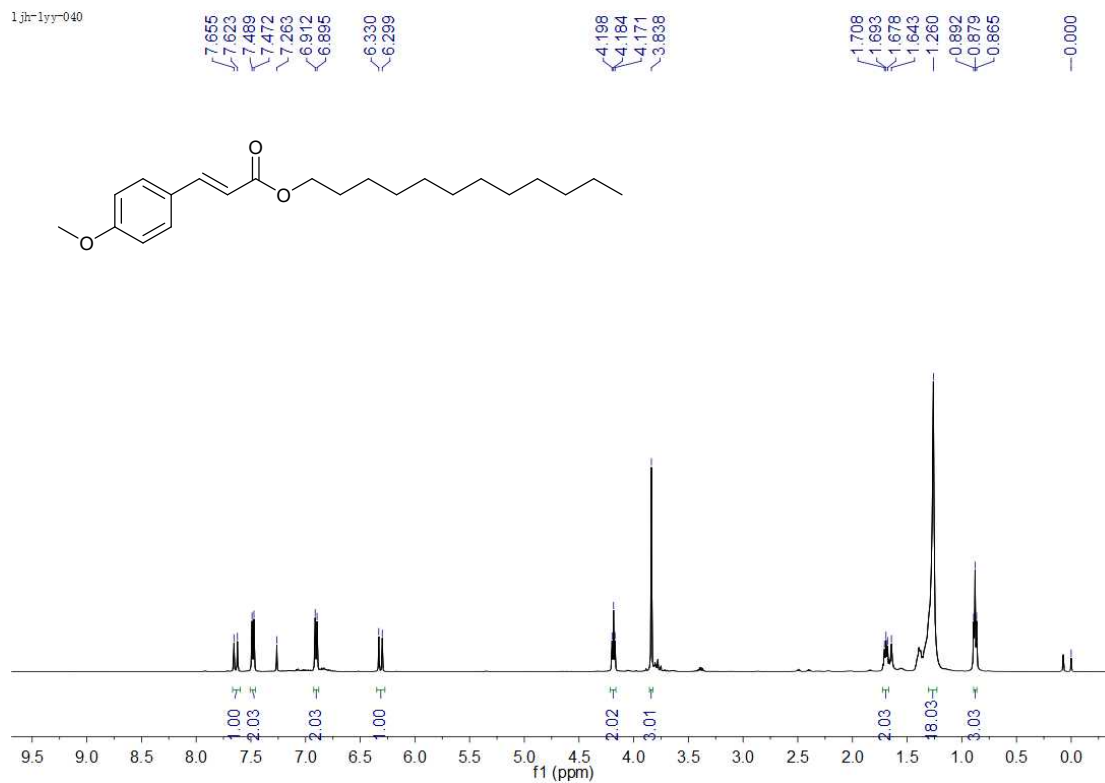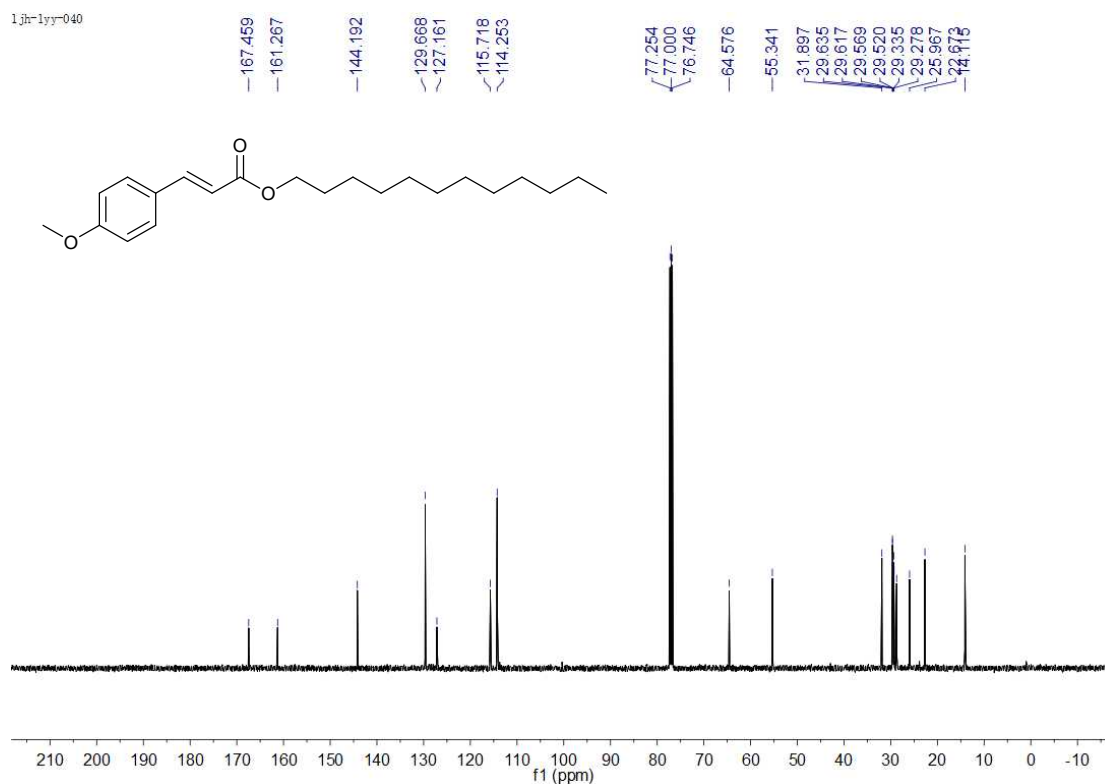



Neopentyl (*E*)-3-(4-methoxyphenyl)acrylate (4ae):

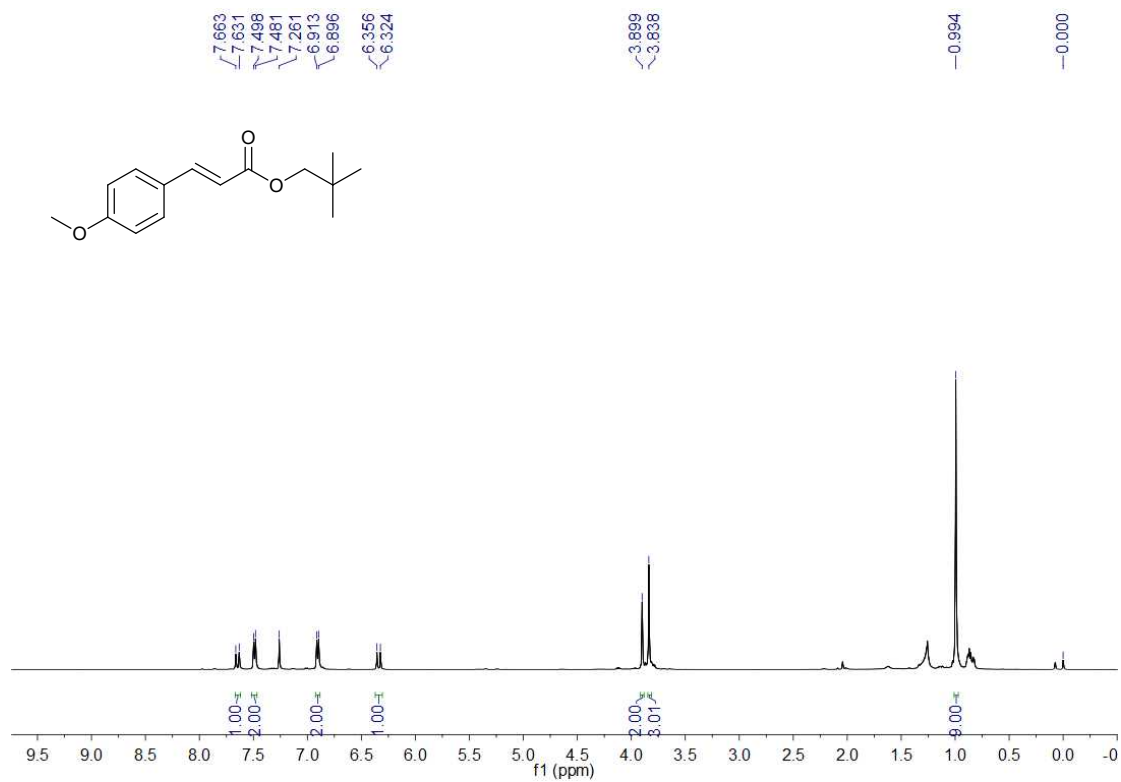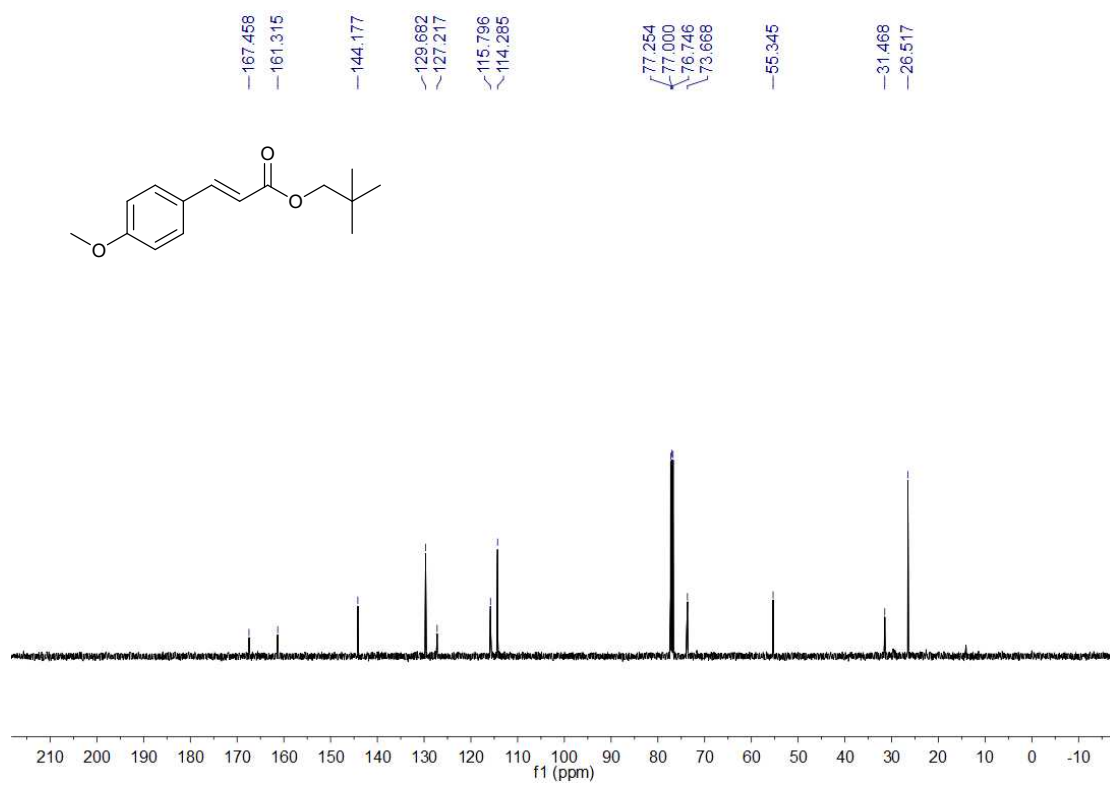

**But-3-en-1-yl (*E*)-3-(4-methoxyphenyl)acrylate (4af):**

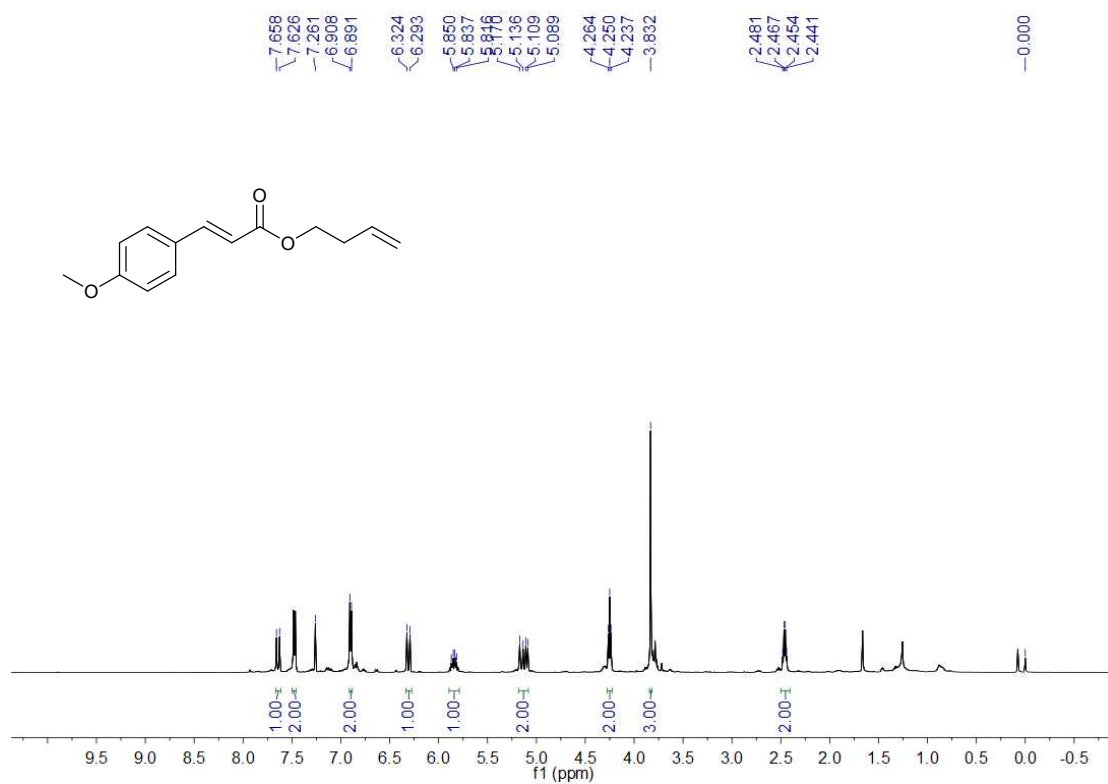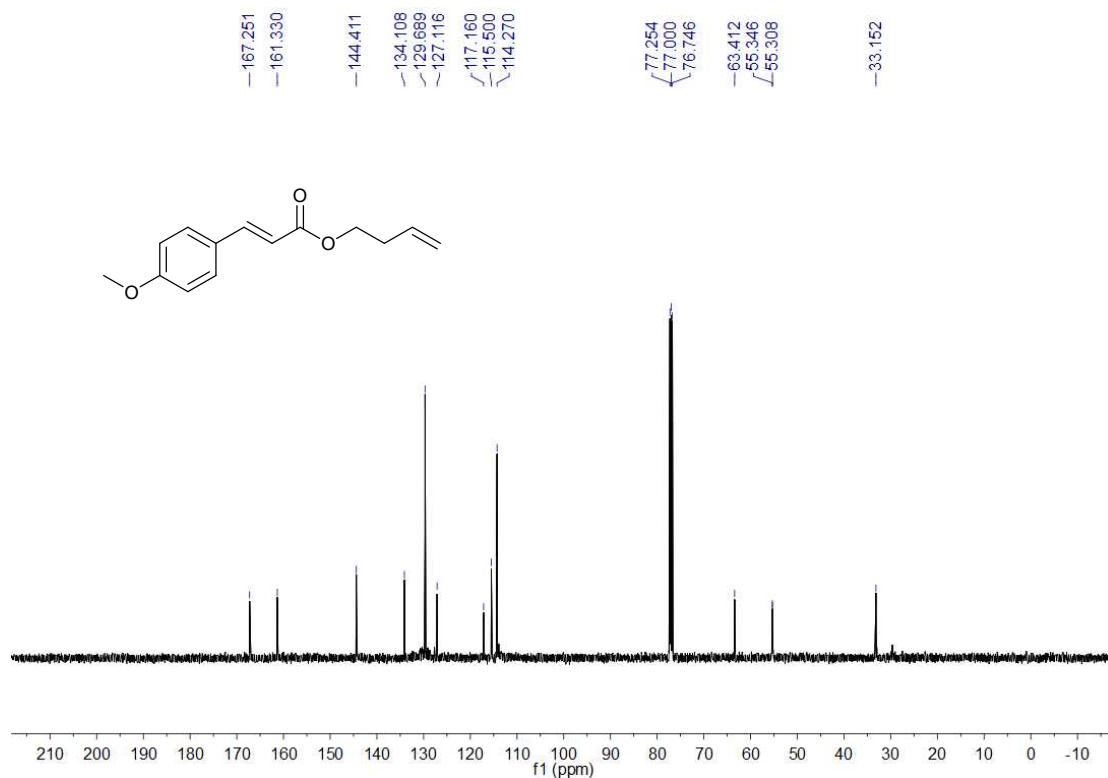

### 3-Bromopropyl (*E*)-3-(4-methoxyphenyl)acrylate (4ag):

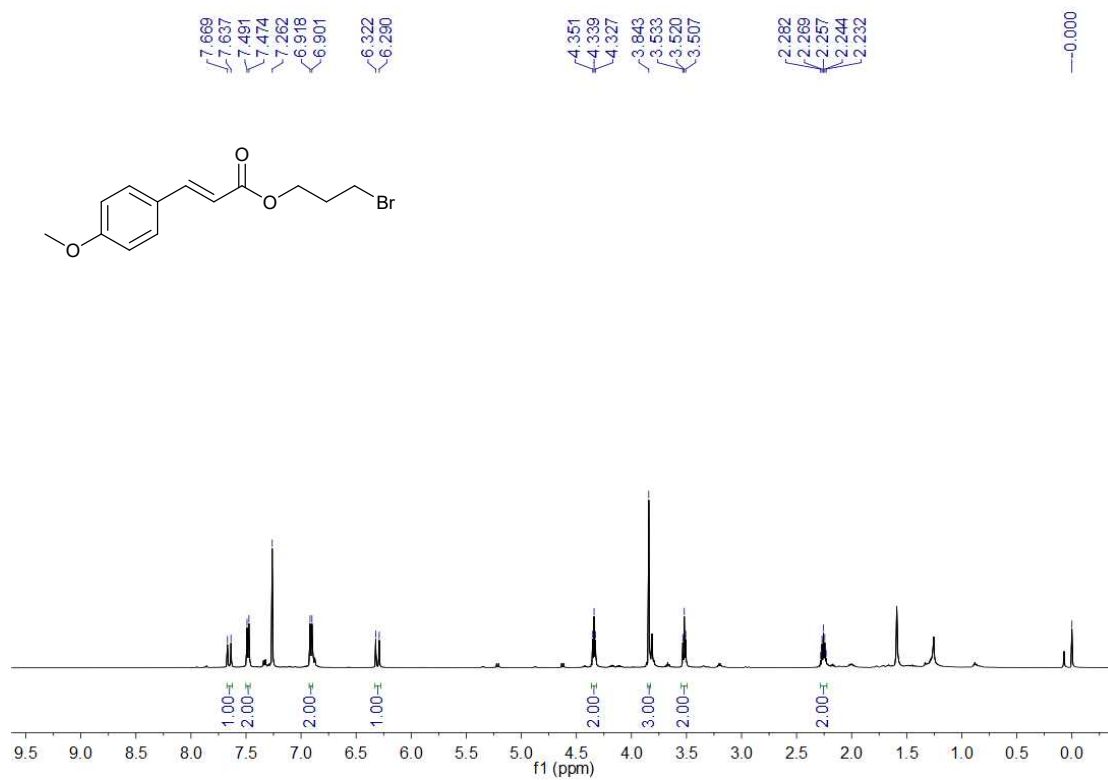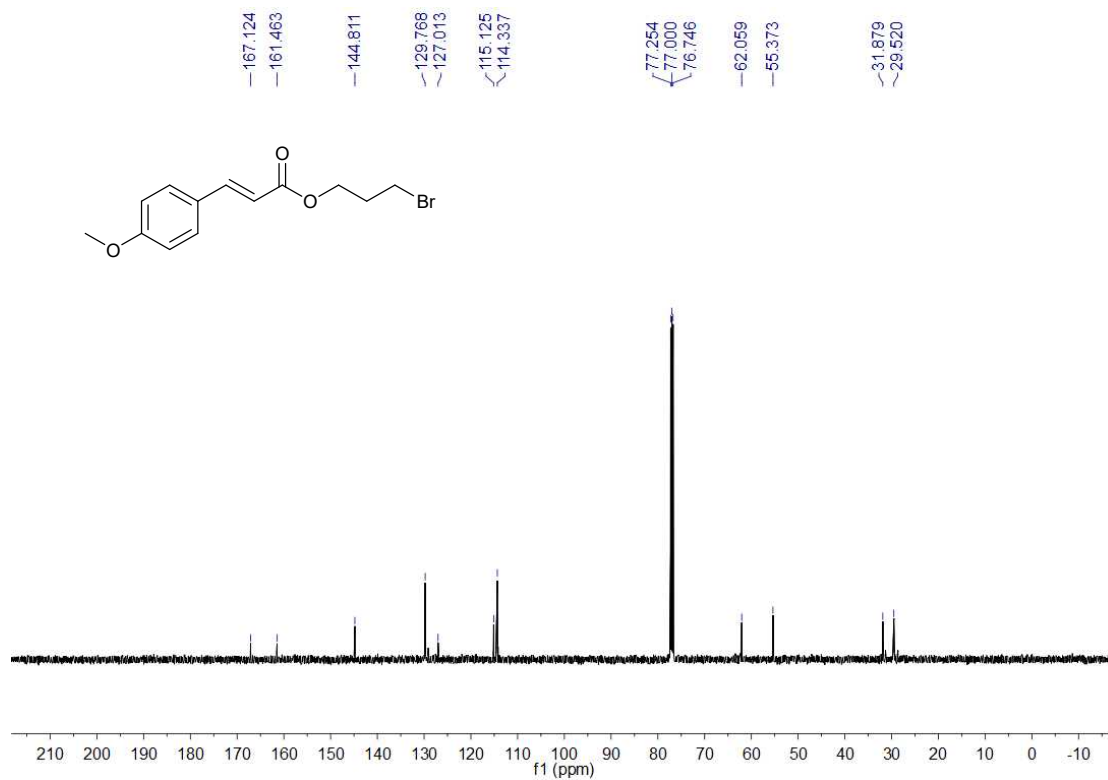

### Isopropyl (*E*)-3-(4-methoxyphenyl)acrylate (4ah):

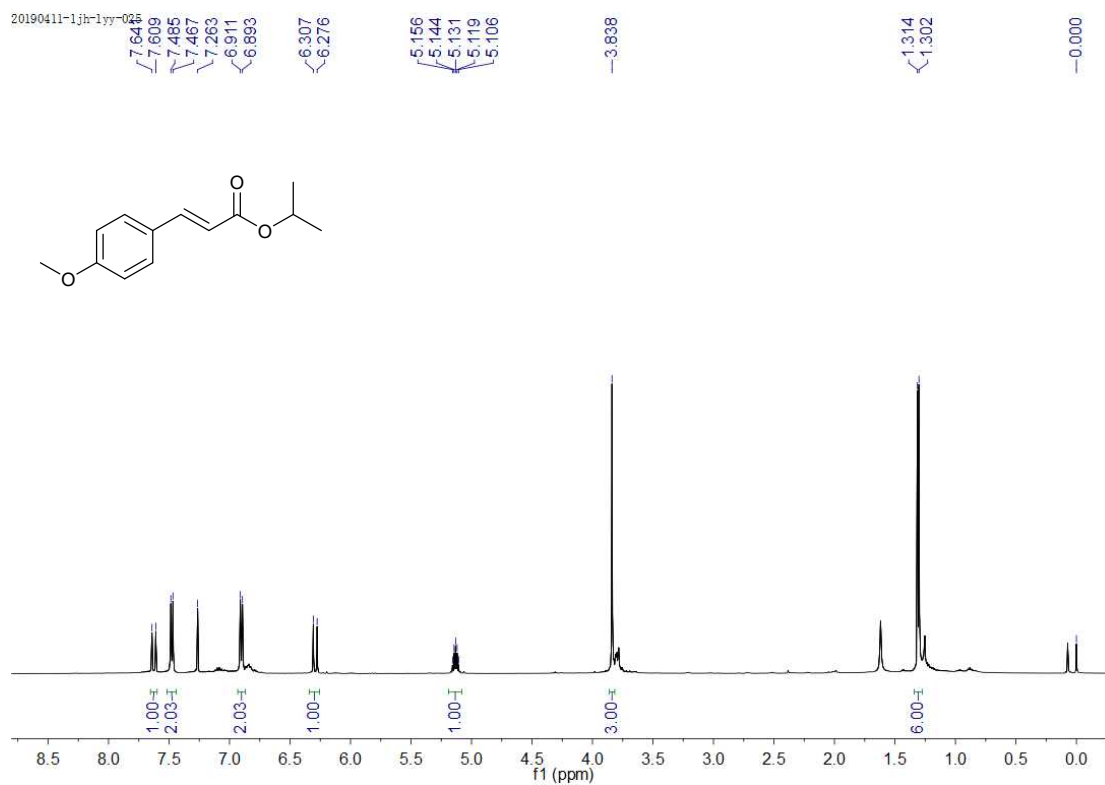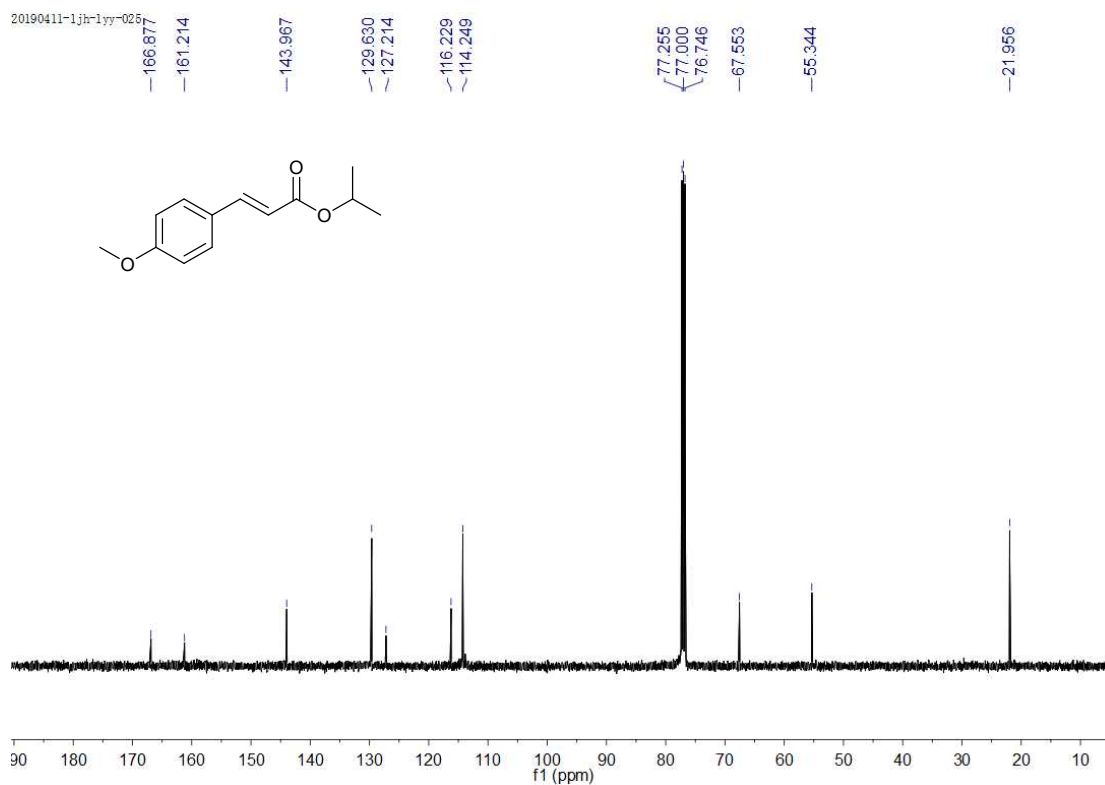

**(1R,2R,5S)-2-Isopropyl-5-methylcyclohexyl  
(4ai):**

**(E)-3-(4-methoxyphenyl)acrylate**

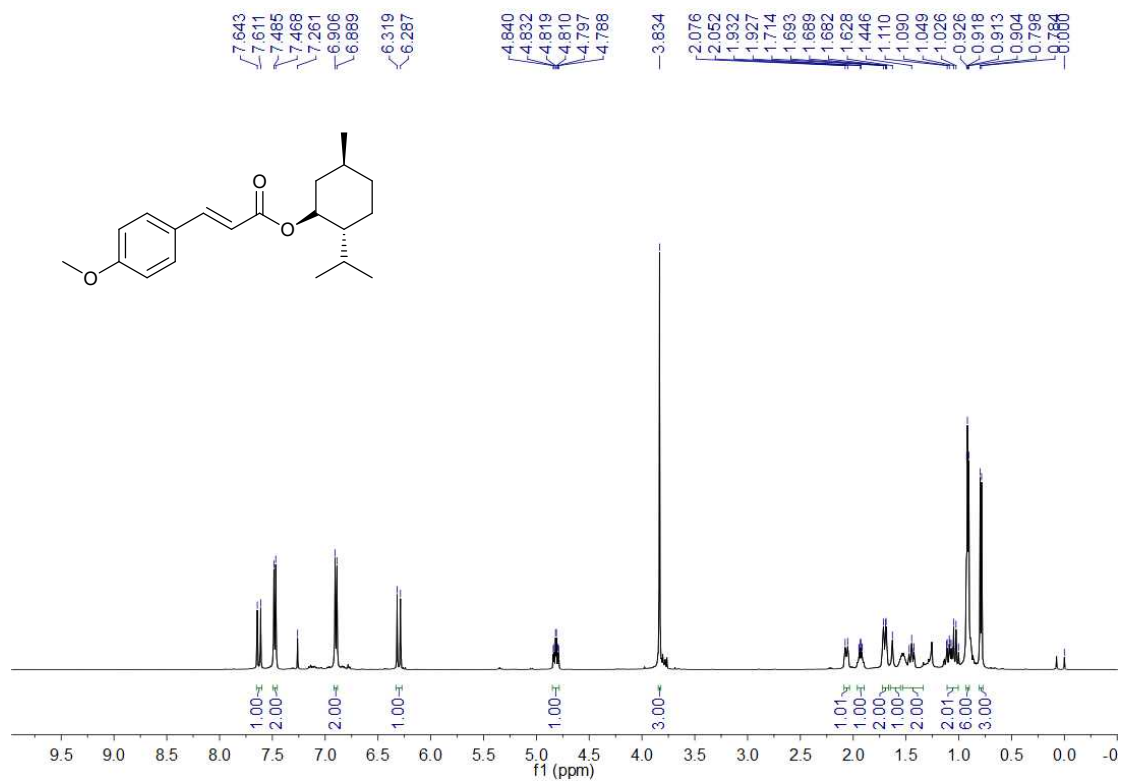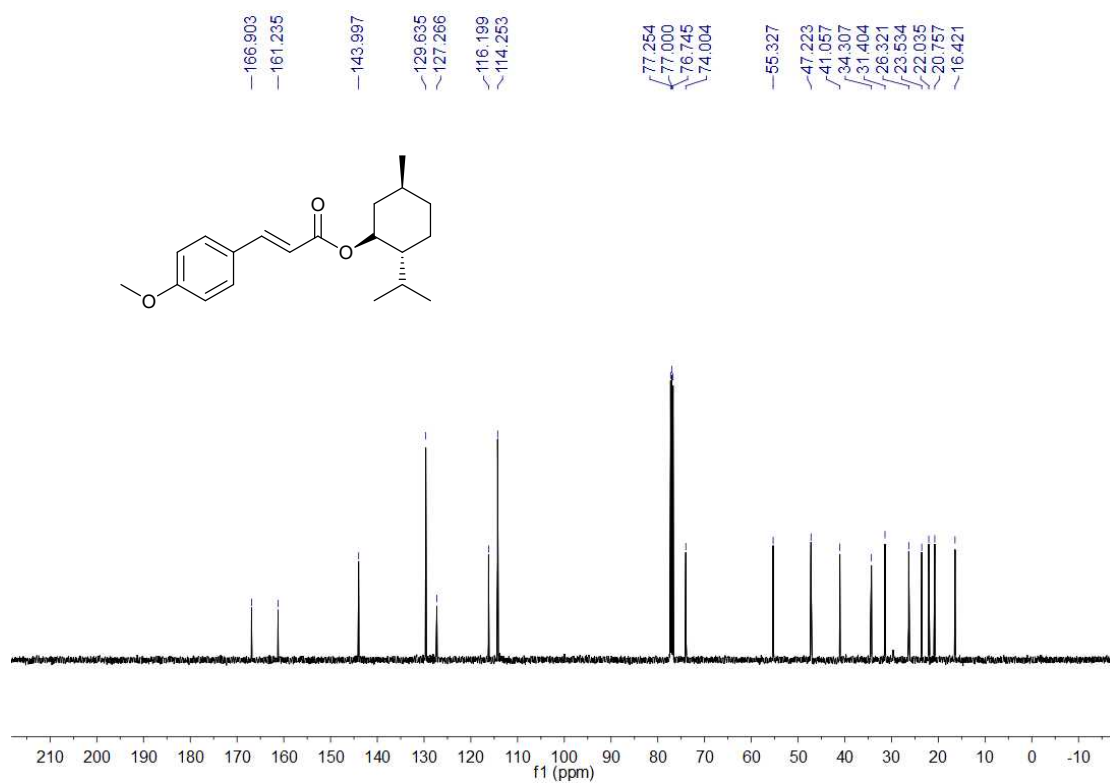

**(1r,3r,5r,7r)-Adamantan-2-yl (*E*)-3-(4-methoxyphenyl)acrylate (4aj):**

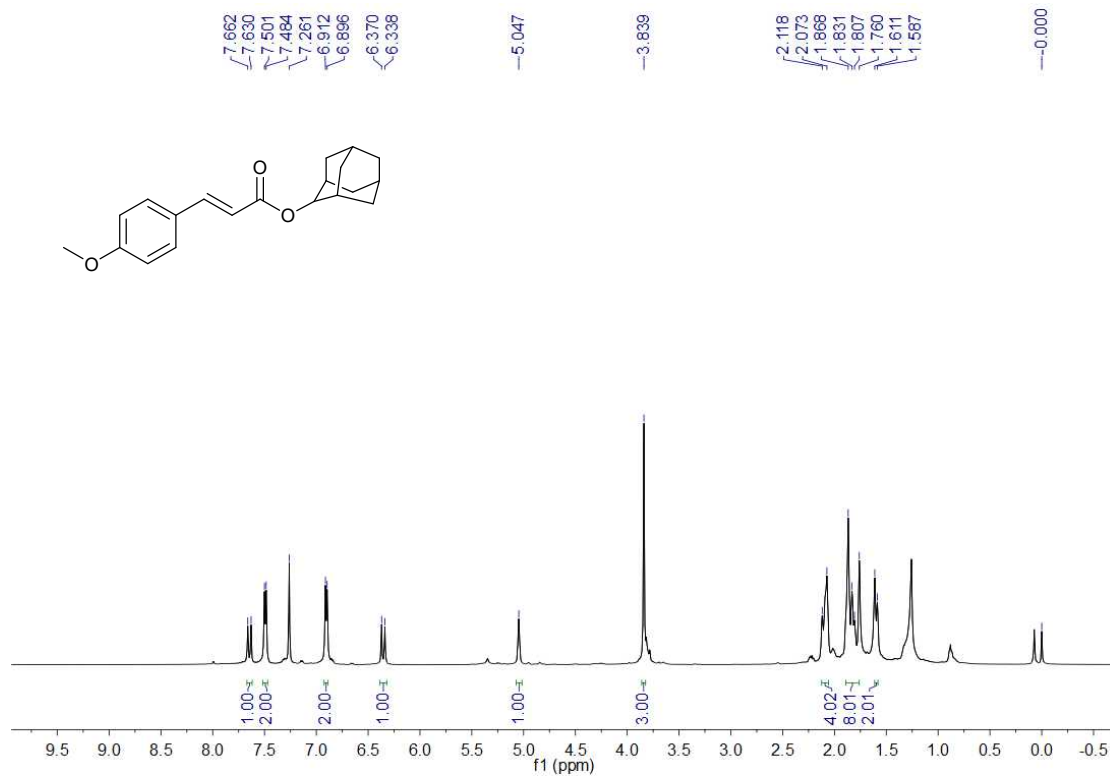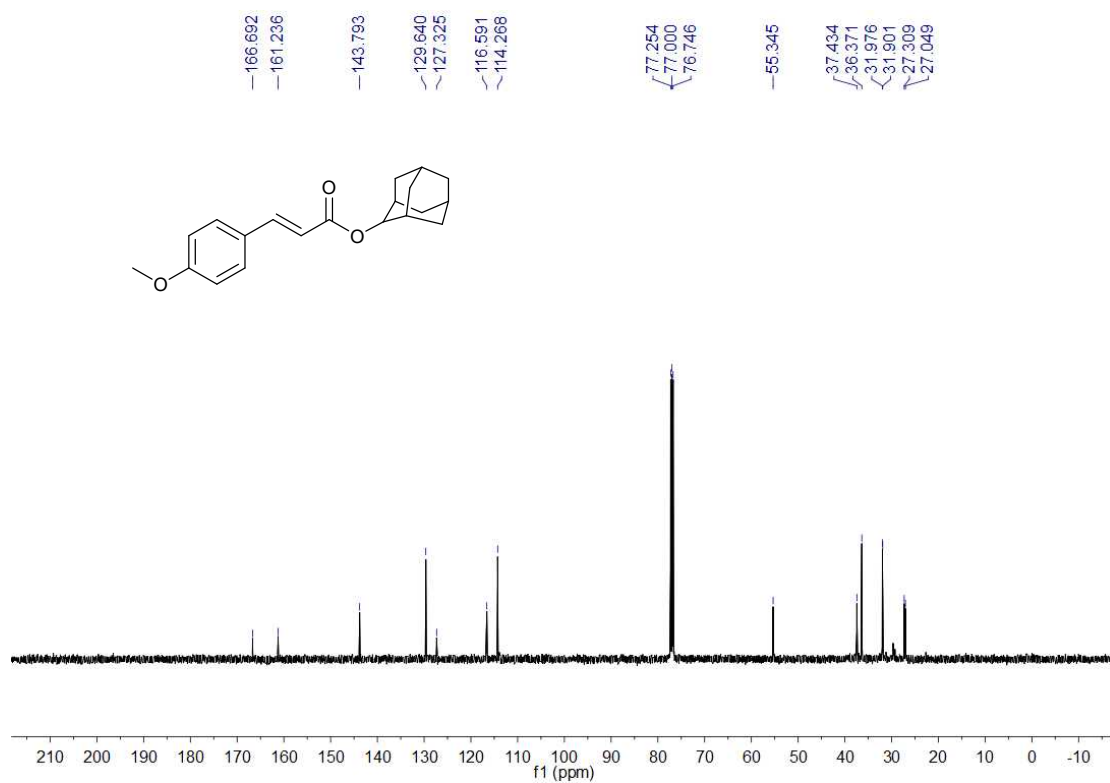

**Ethyl (*E*)-3-(4-ethoxyphenyl)acrylate (4ba):**

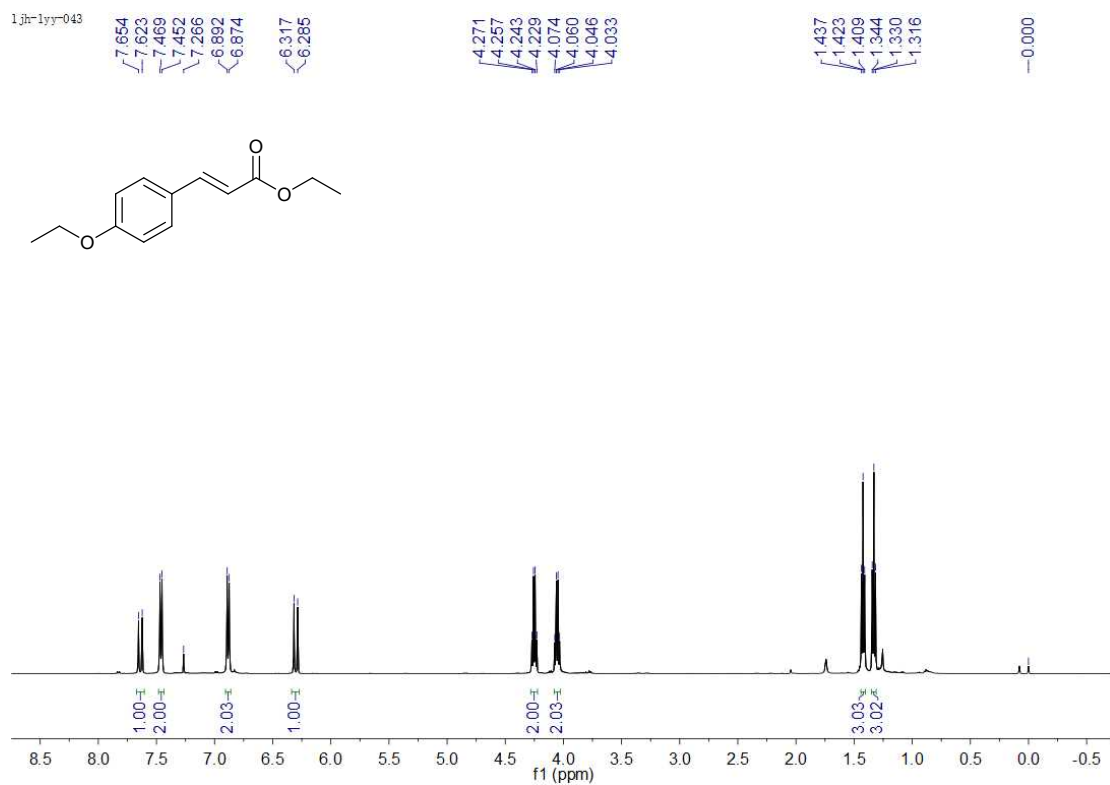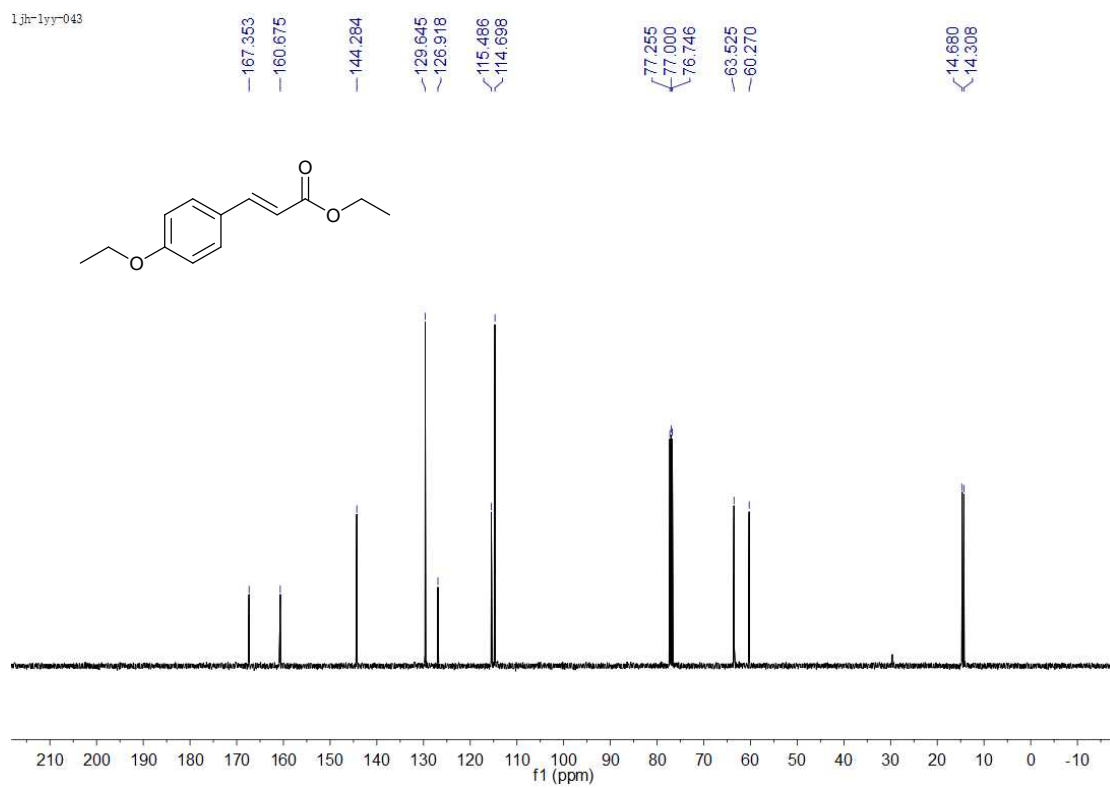

**Ethyl (E)-3-(4-(benzyloxy)phenyl)acrylate (4ca):**

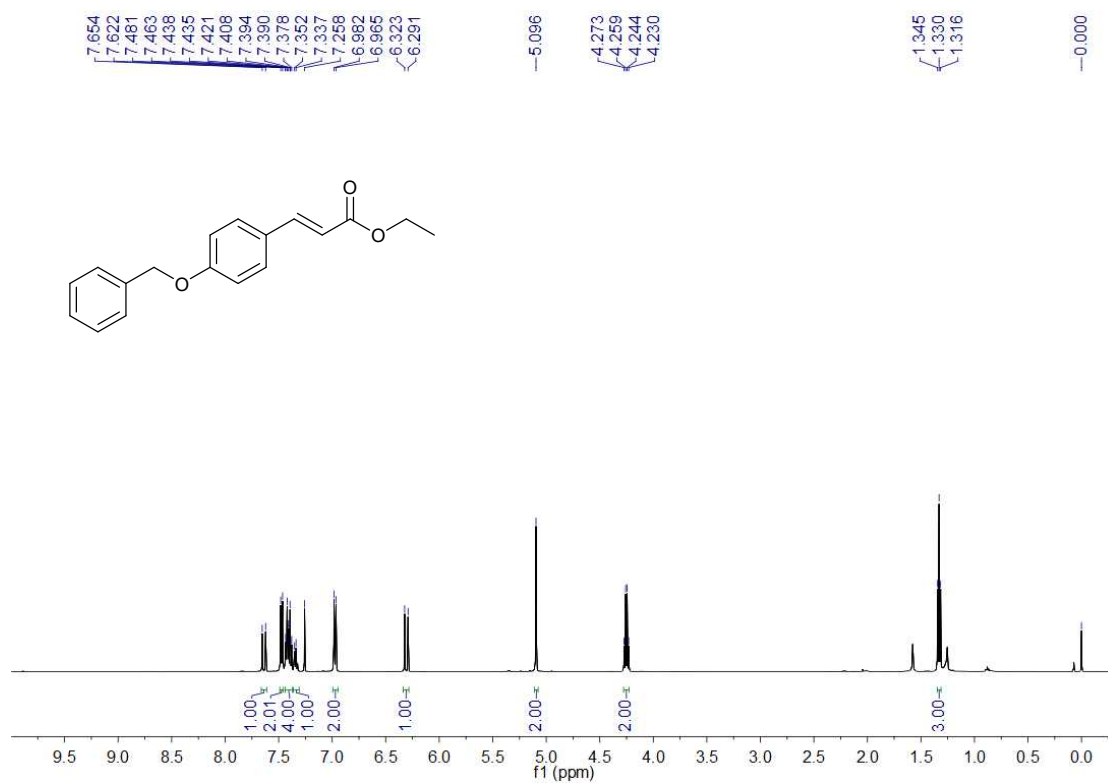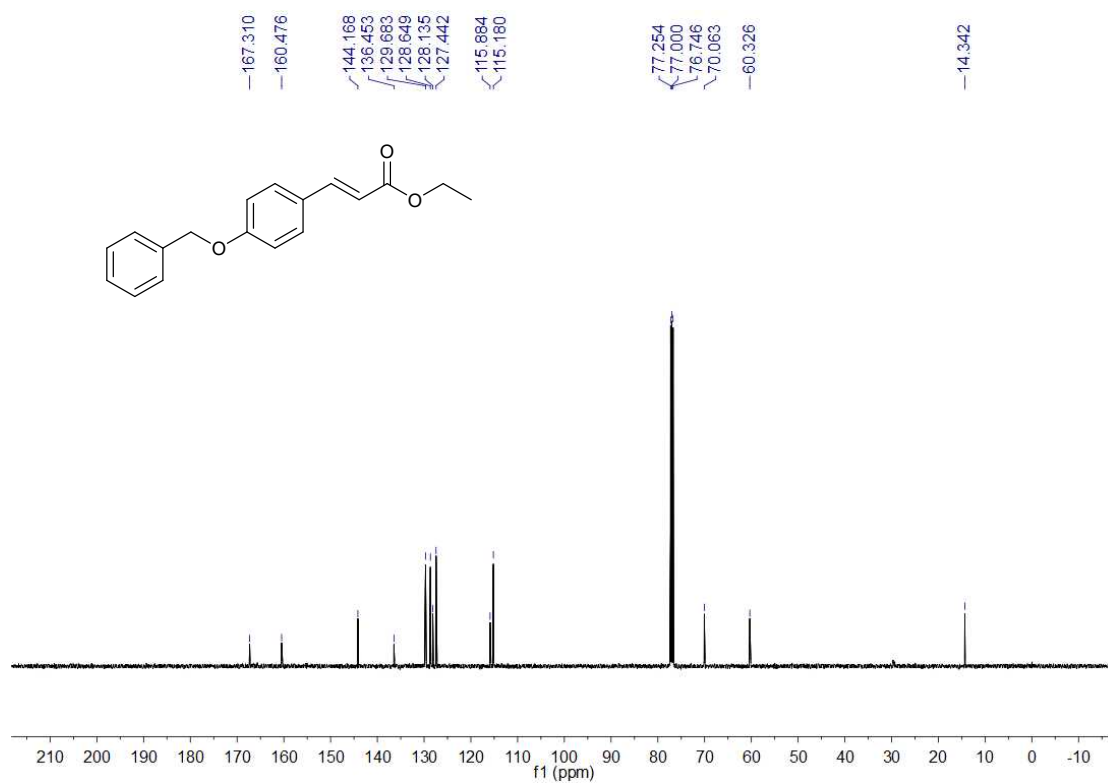



**Ethyl (*E*)-3-(4-(methylthio)phenyl)acrylate (4da):**

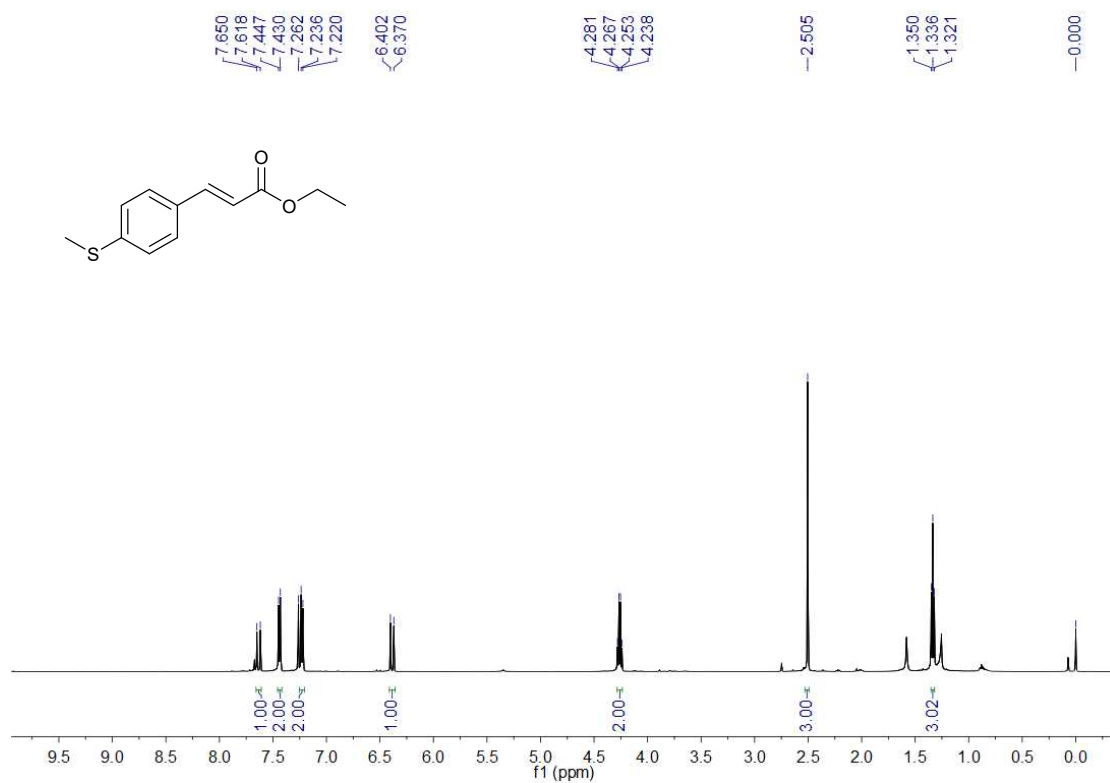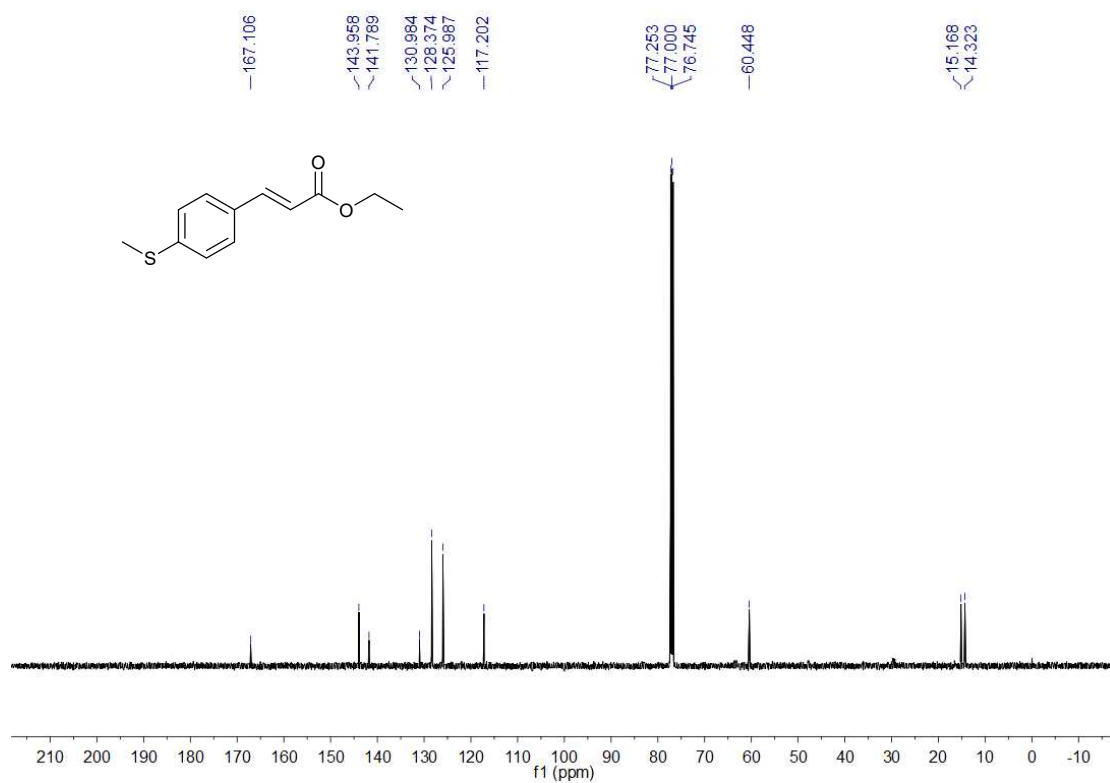

# Methyl (*E*)-3-(2-methoxyphenyl)acrylate (4ea):

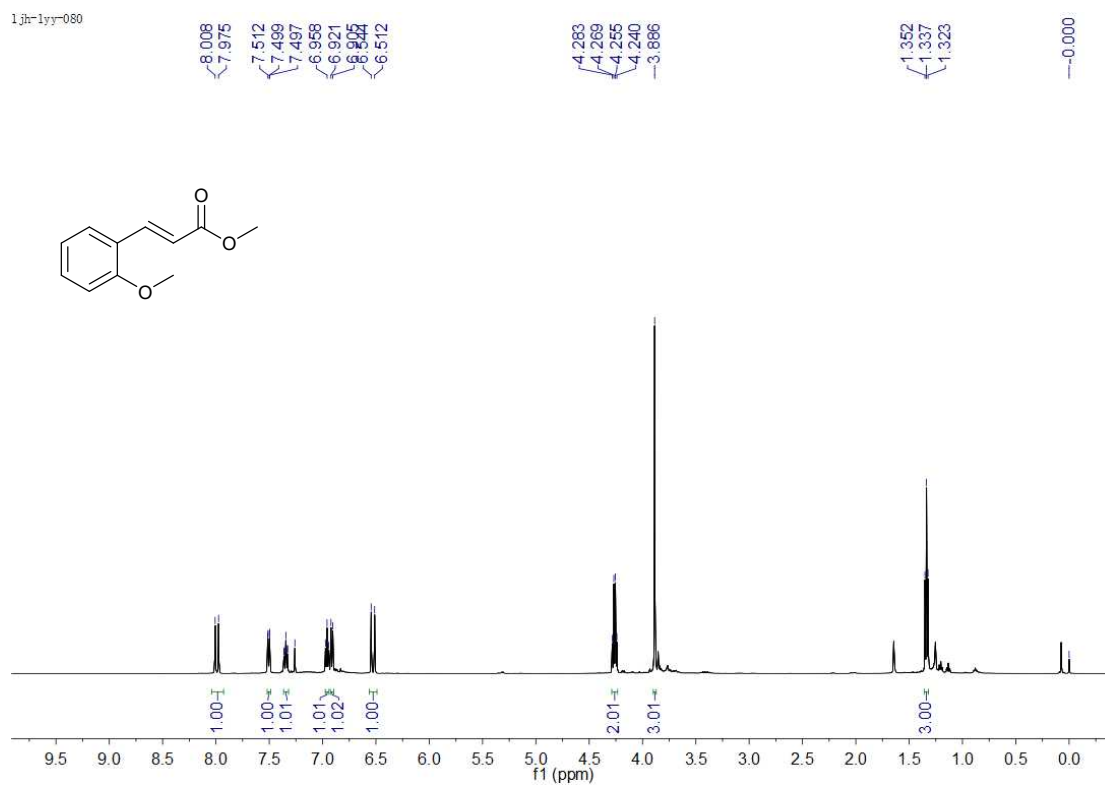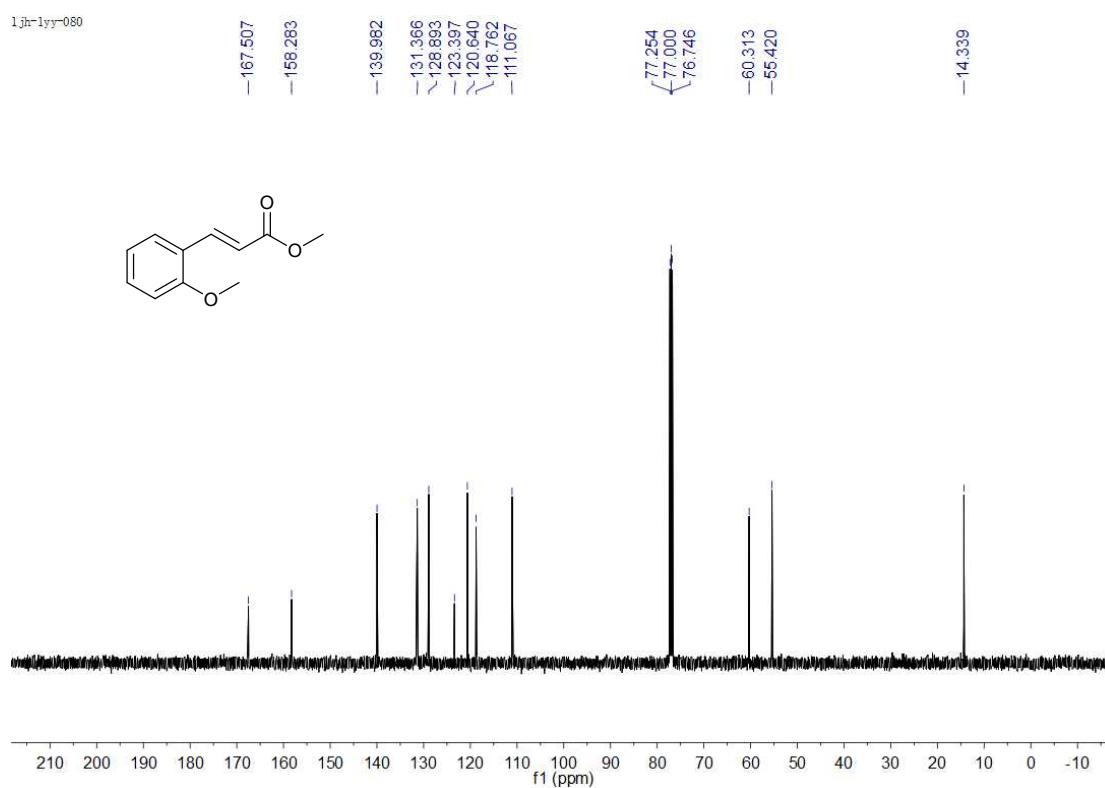

# Ethyl (*E*)-3-(4-methoxy-3-methylphenyl)acrylate (4fa):

20190411-1-jh-1yy-026

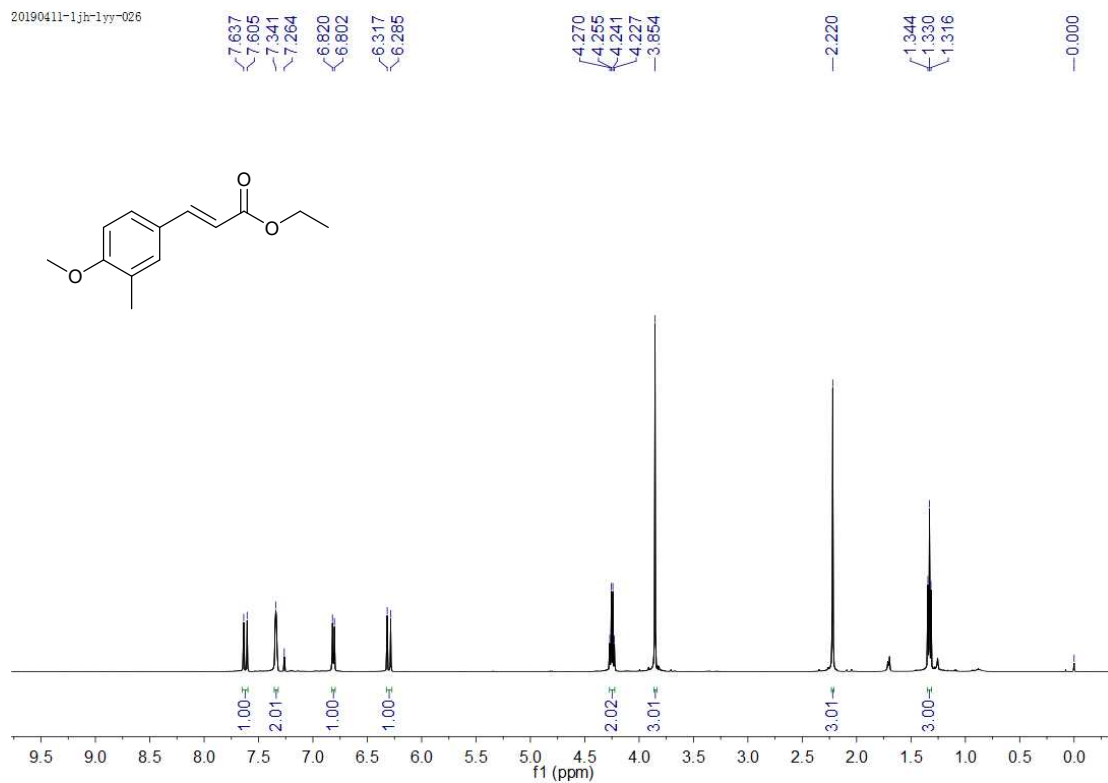

20190411-1-jh-1yy-026

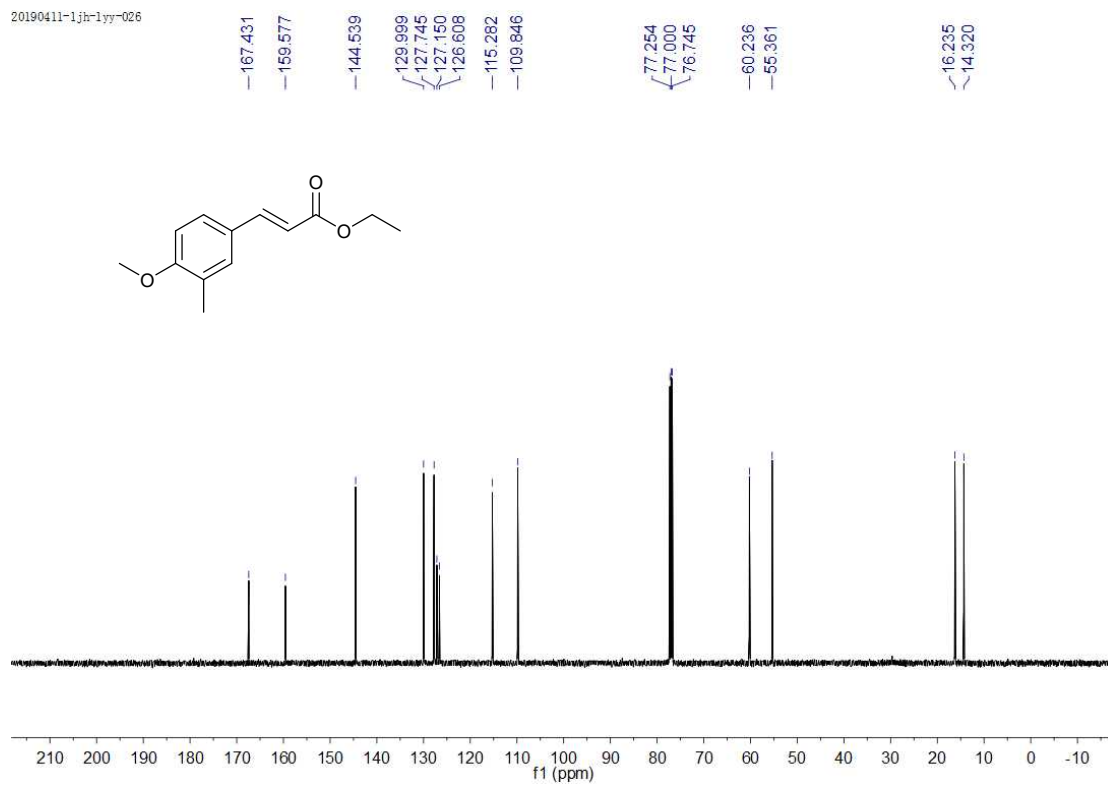

# Ethyl (*E*)-3-(3-methylthiophen-2-yl)acrylate (4ga):

1jhr-1yy-066

7.860  
7.829  
7.269  
7.253  
7.243  
6.868  
6.857  
6.189  
6.157  
4.270  
4.256  
4.241  
4.227  
-2.343  
1.341  
1.327  
1.313  
-0.000

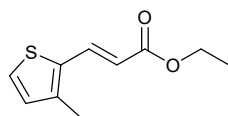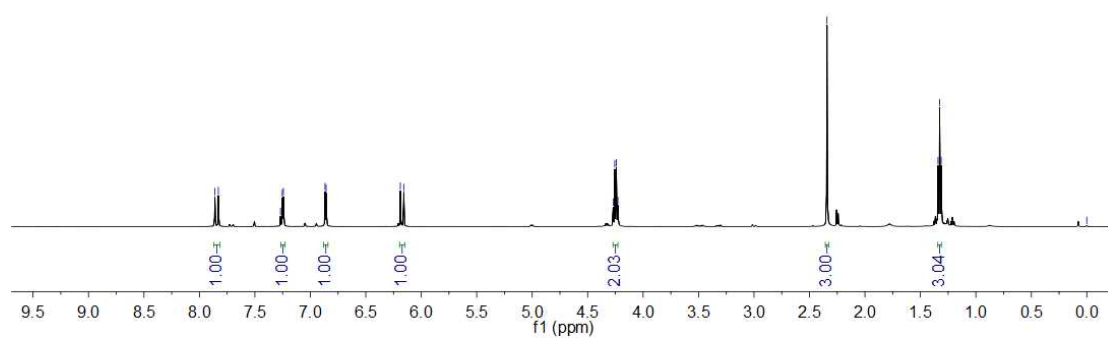

20190518-1jhr-1yy-067

167.129  
141.167  
135.440  
133.571  
131.073  
126.812  
115.880  
77.255  
77.000  
76.746  
60.366  
14.281  
14.099

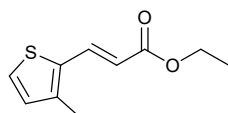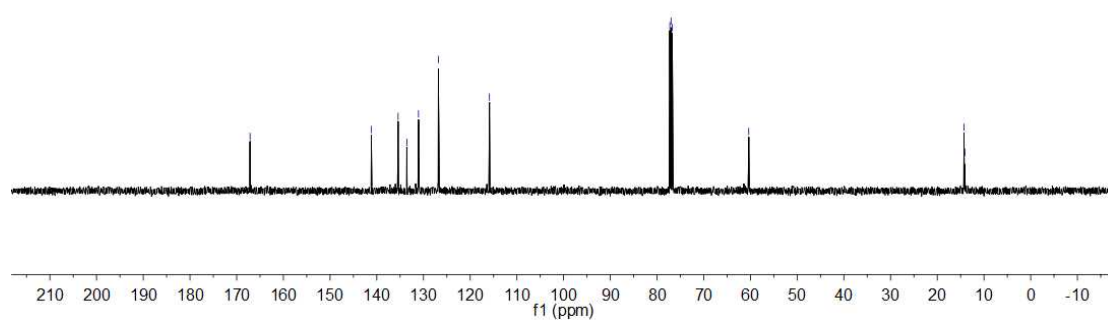

# Ethyl (2E,4E)-5-(4-methoxyphenyl)penta-2,4-dienoate (4ha):

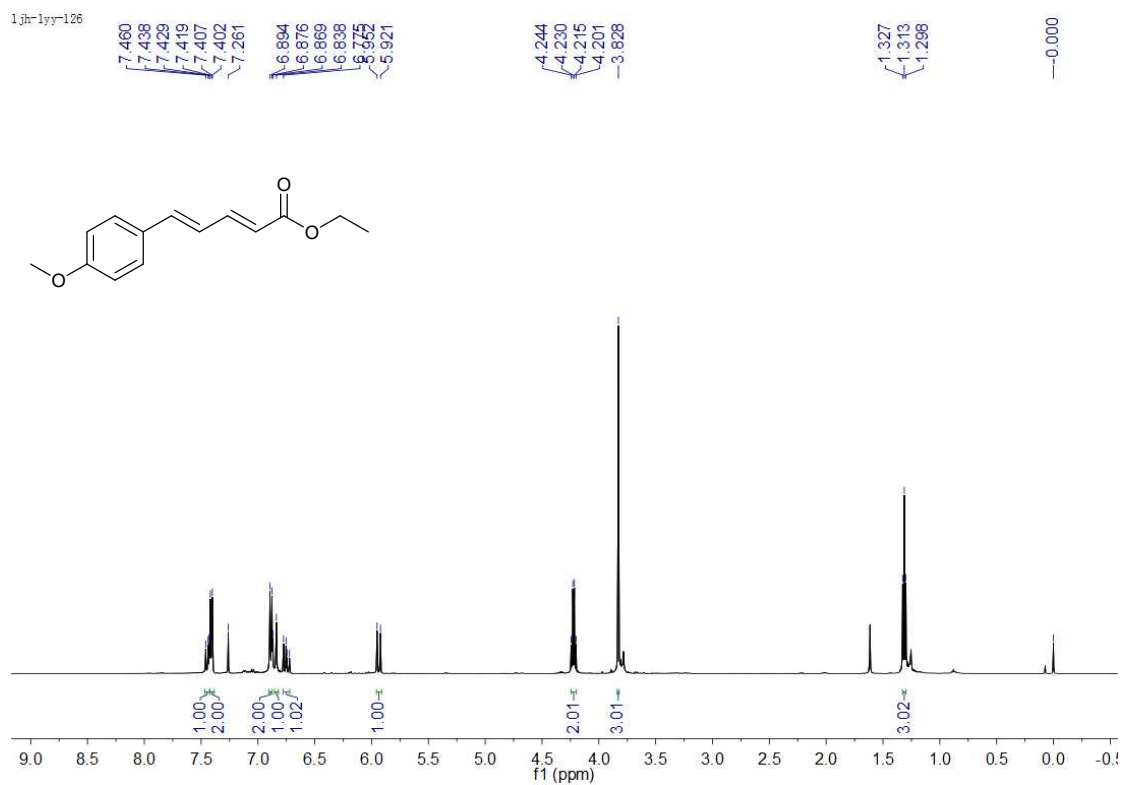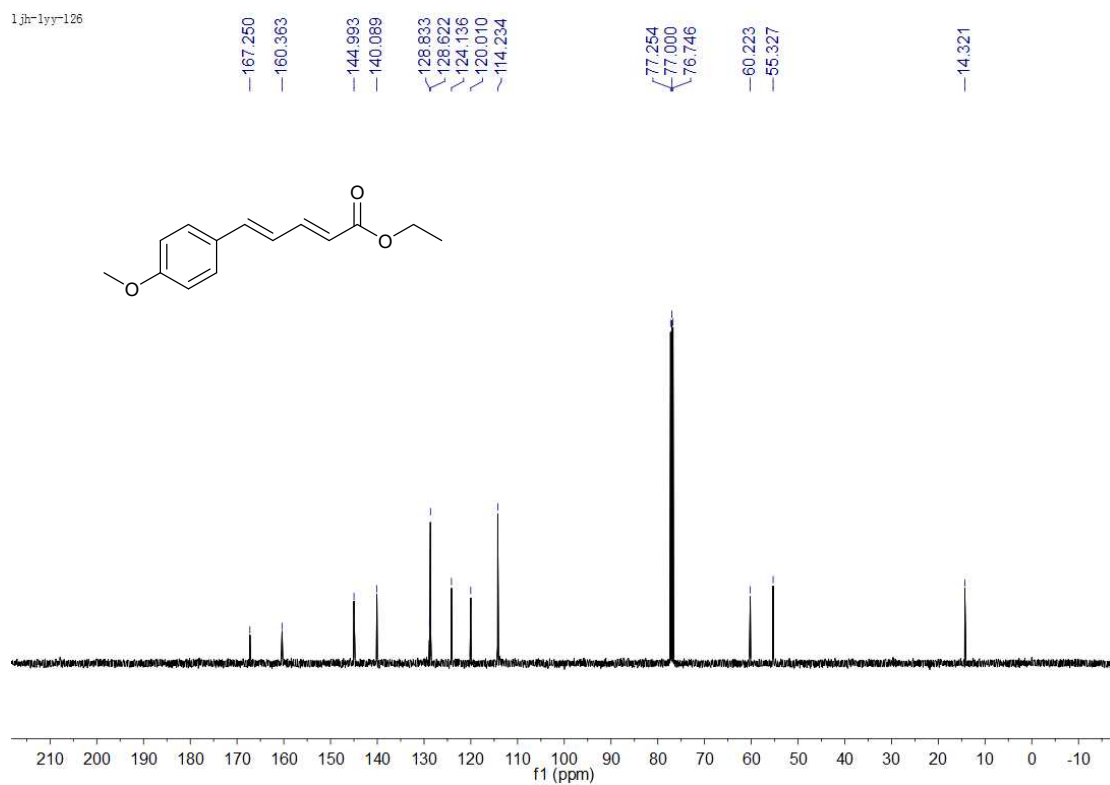

**Ethyl-3-(naphthalen-2-yl)-3-phenylacrylate (4ja):**

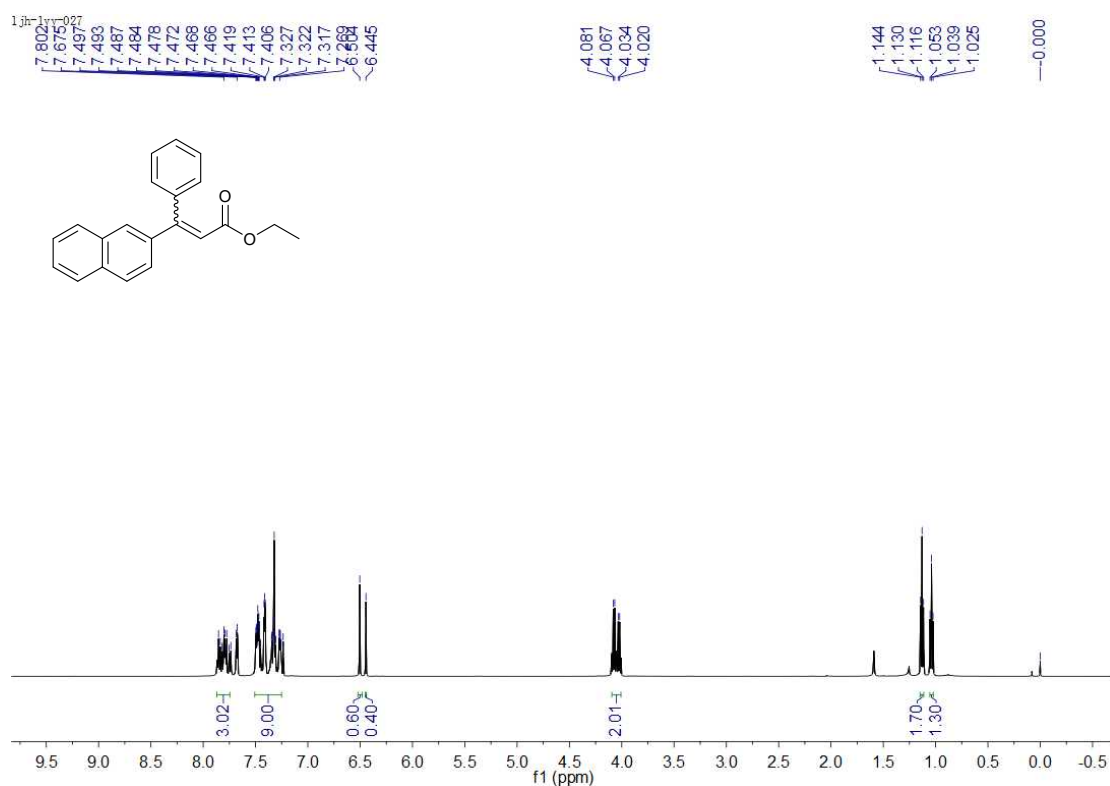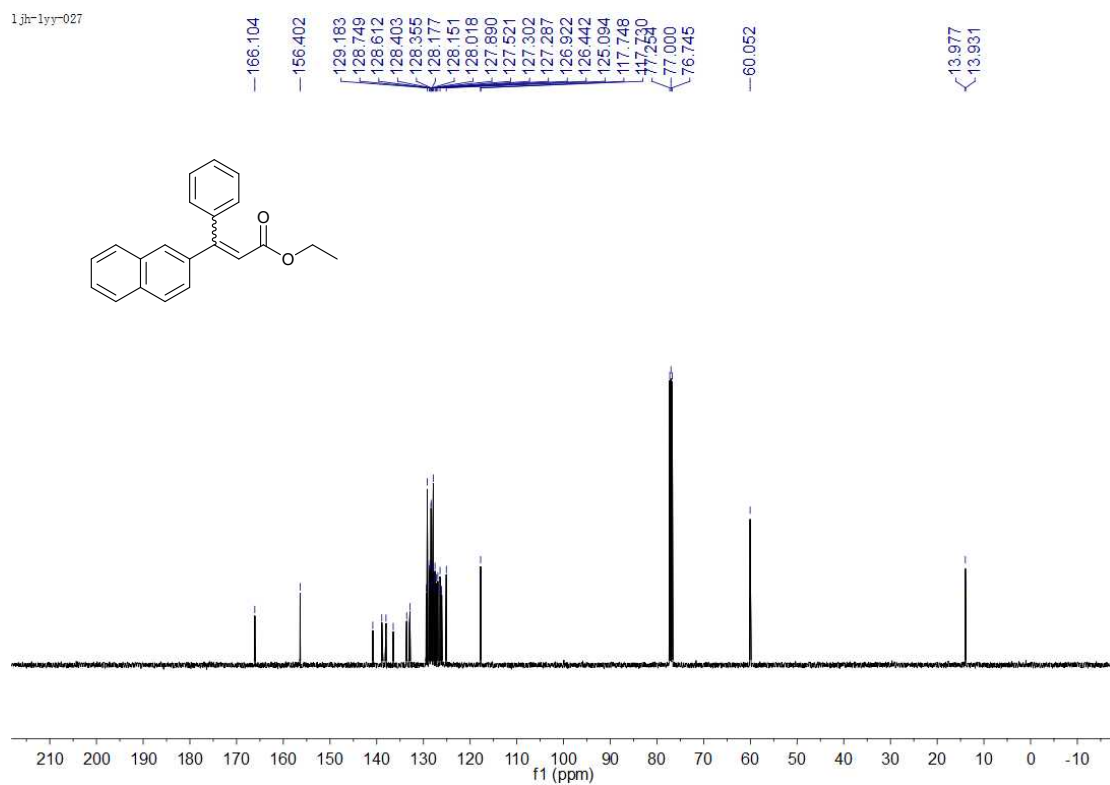

### Ethyl (*E*)-3-phenyl-3-(*o*-tolyl)acrylate (4ka):

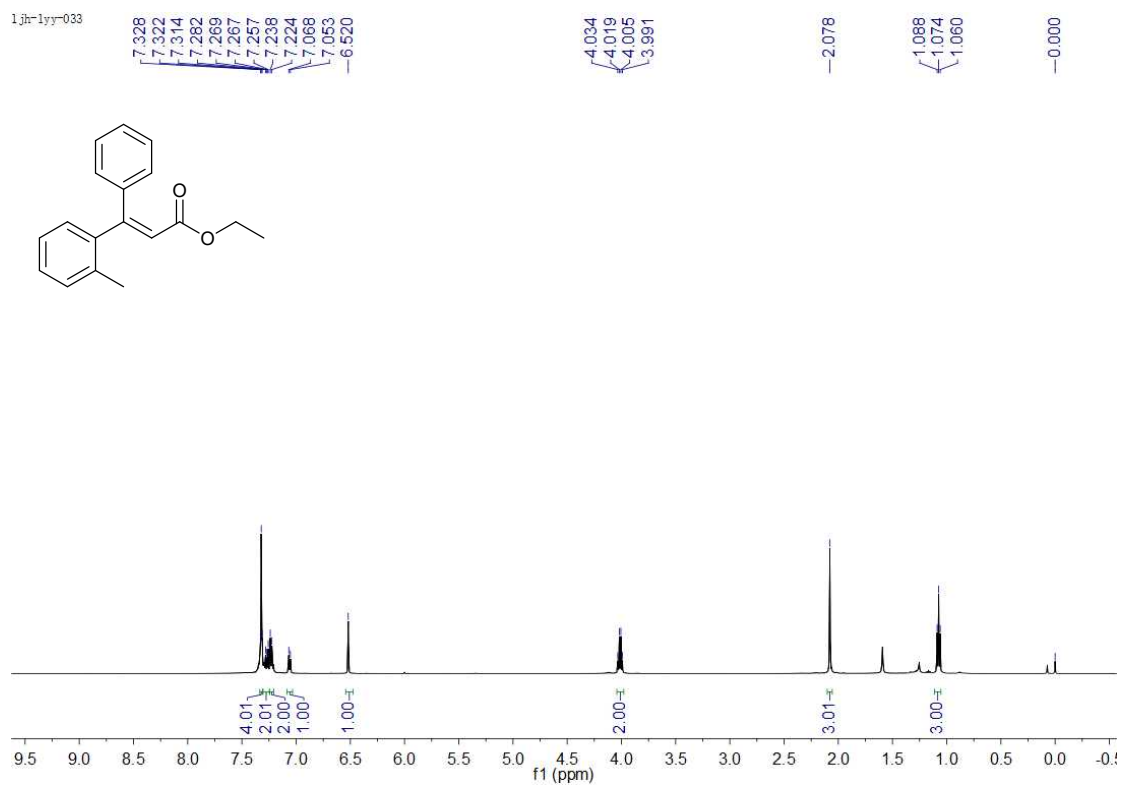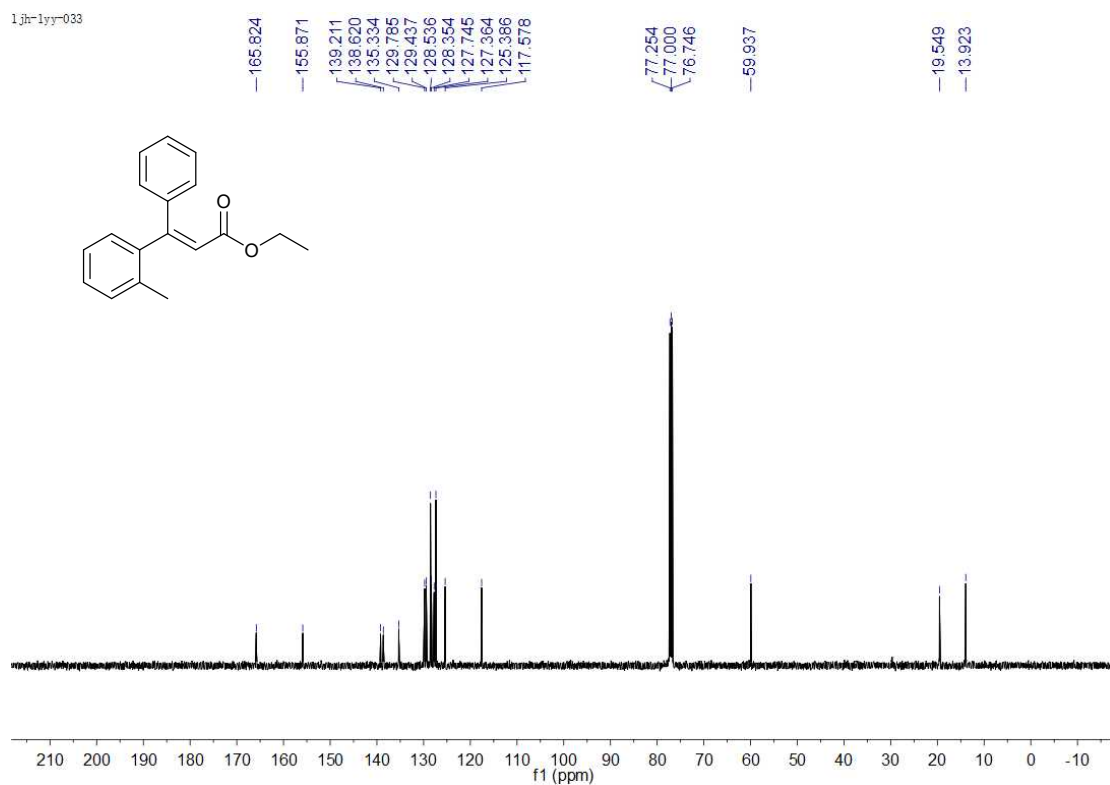

### Ethyl-3-phenyl-3-(*m*-tolyl)acrylate (41a):

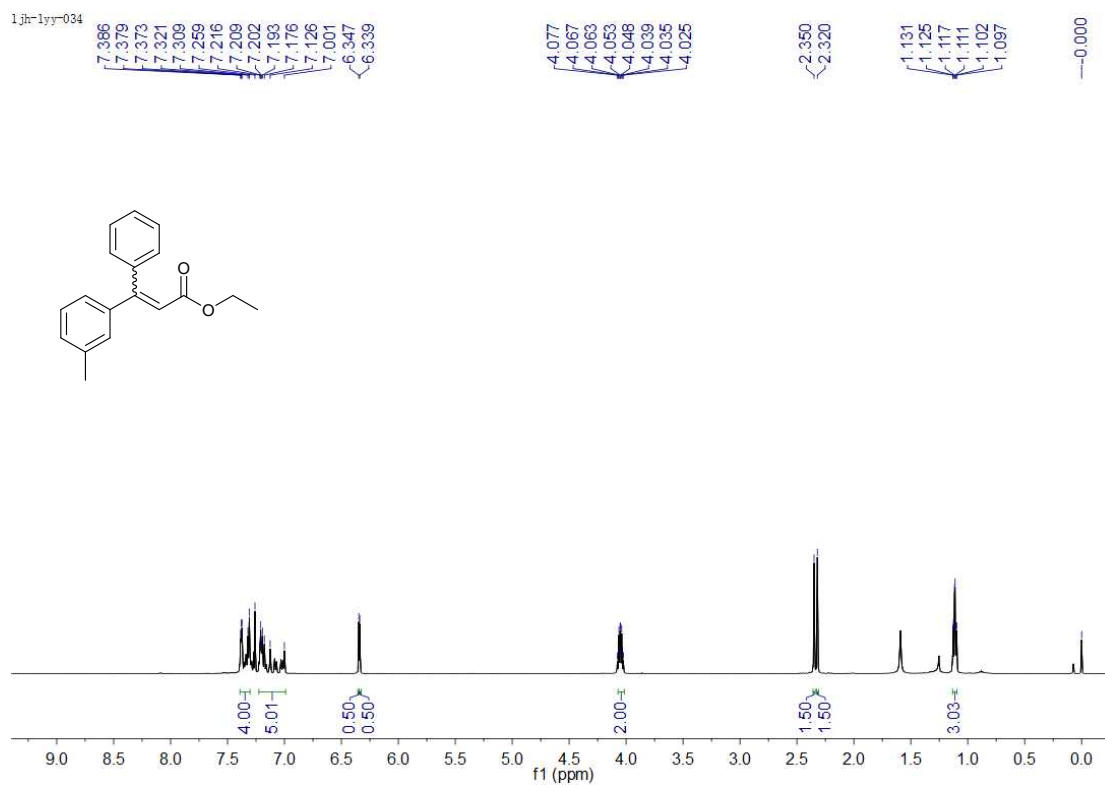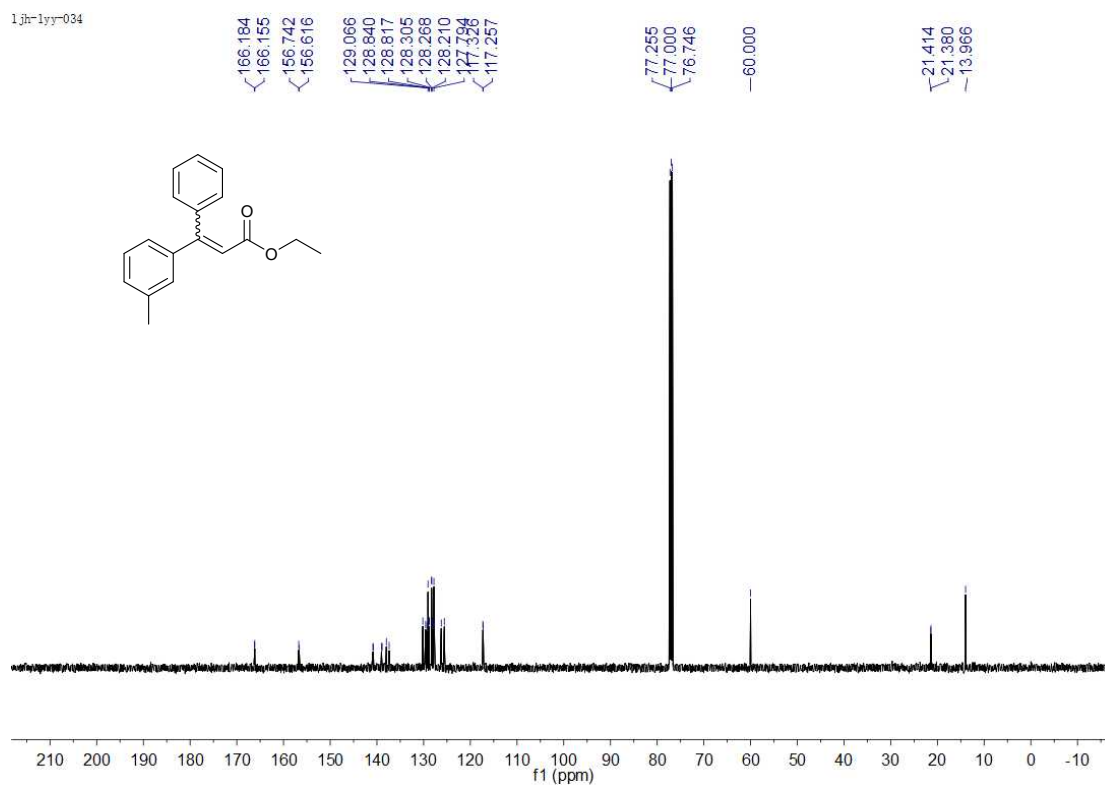



### Ethyl-3-(3-chlorophenyl)-3-phenylacrylate (4ma):

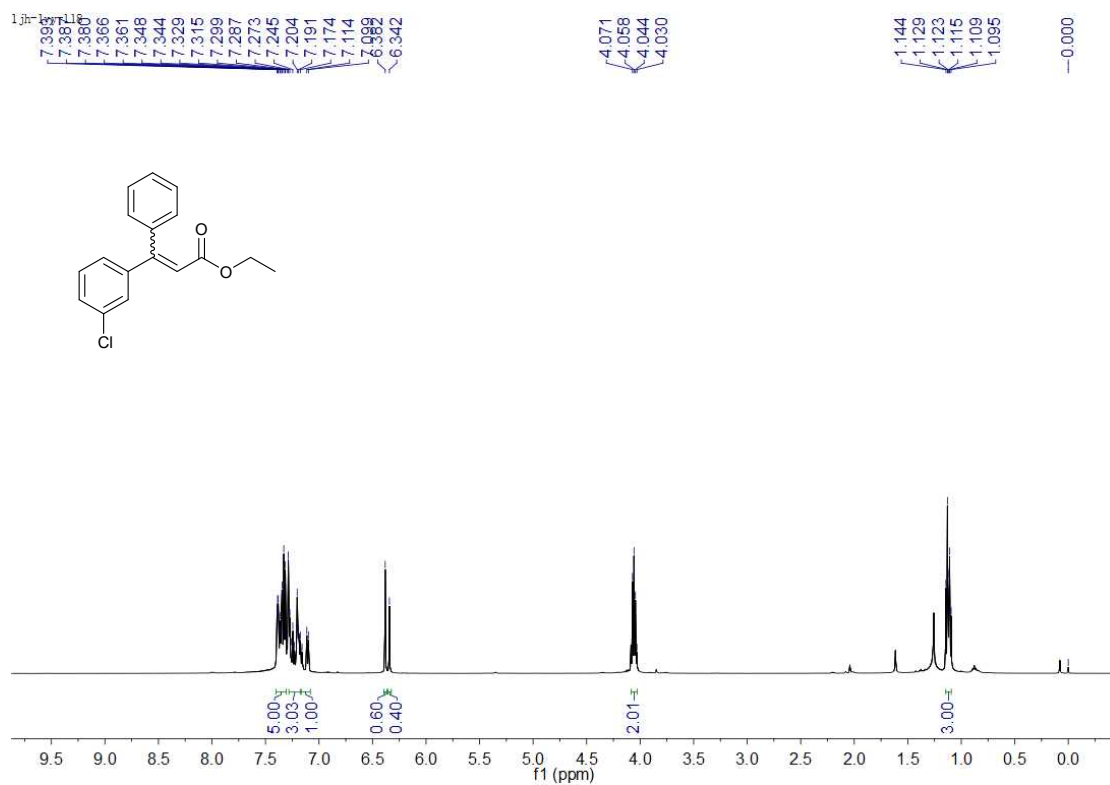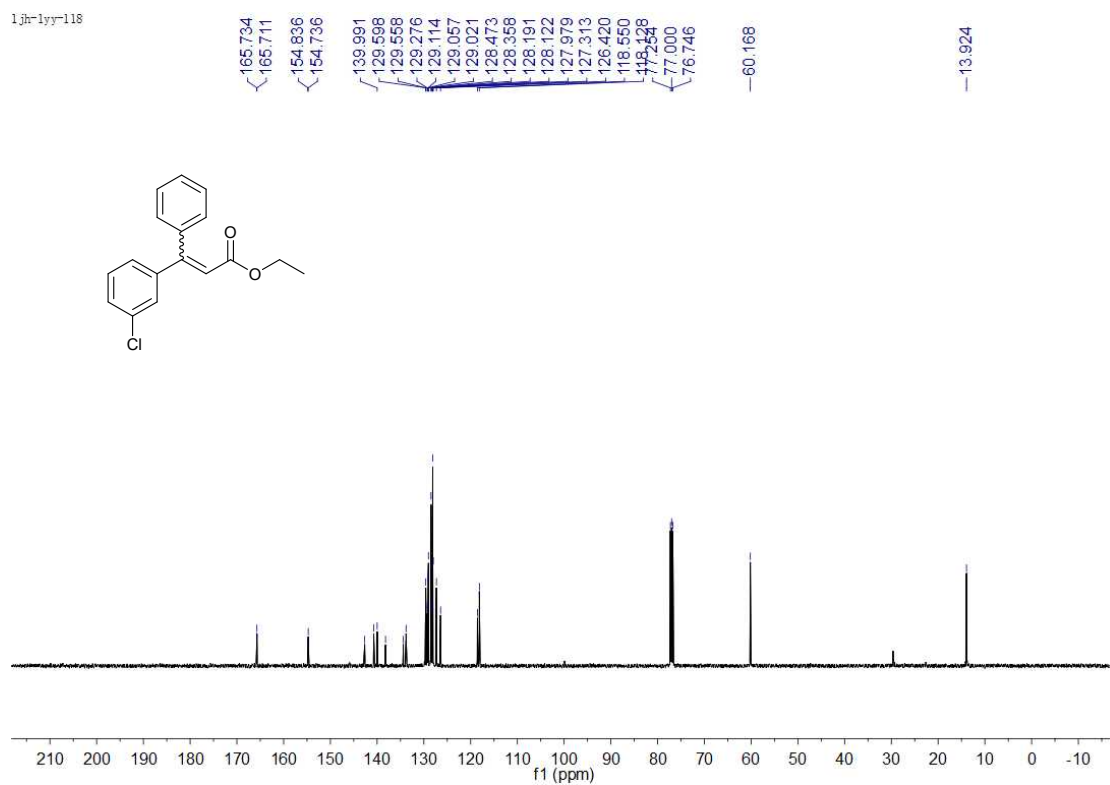

**Ethyl-3-phenyl-3-(*p*-tolyl)acrylate (4na):**

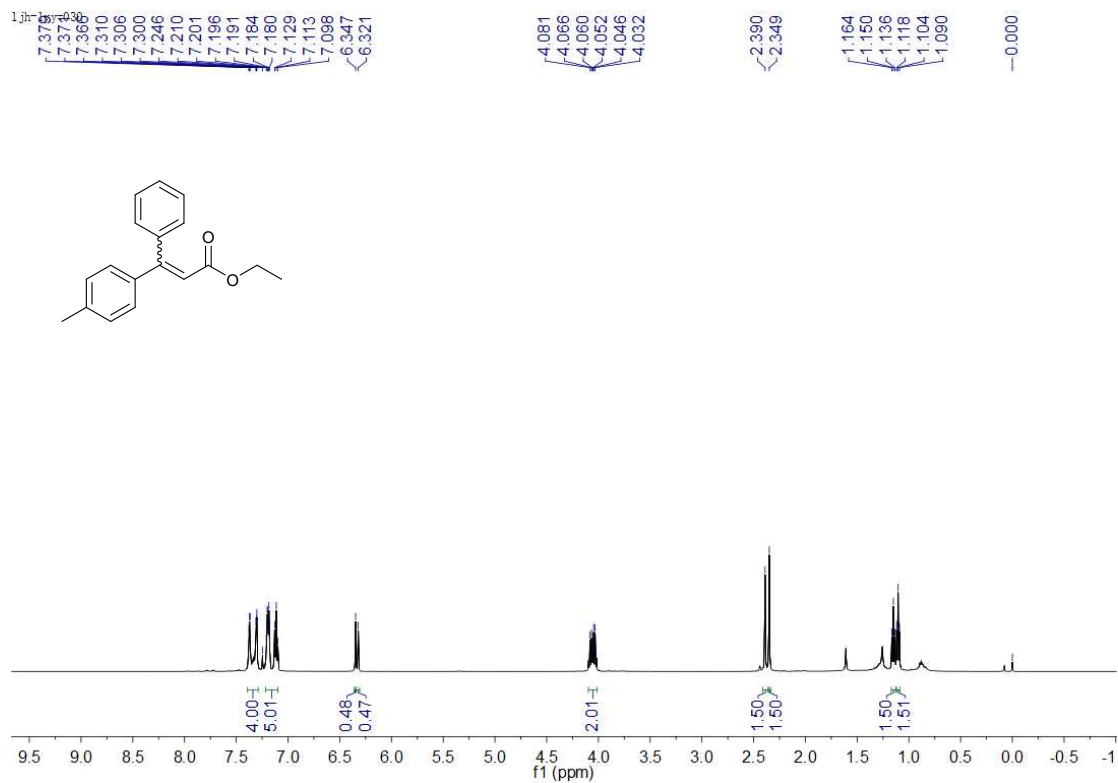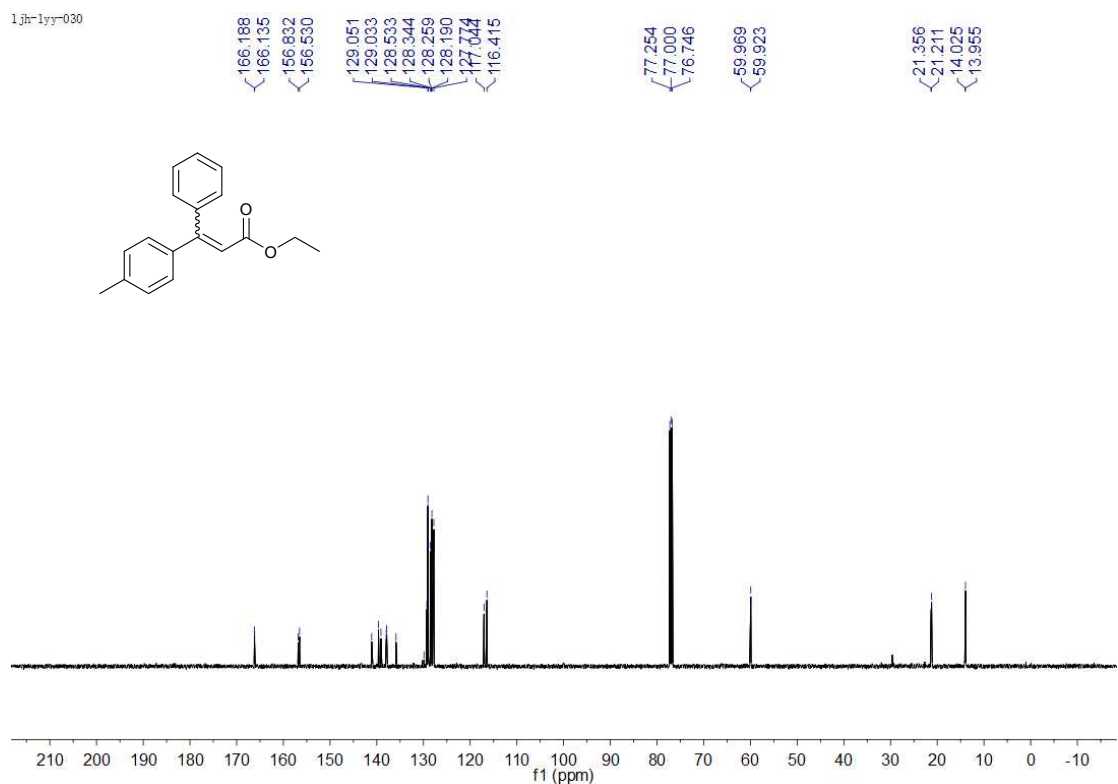

**Ethyl-3-(4-methoxyphenyl)-3-phenylacrylate (40a):**

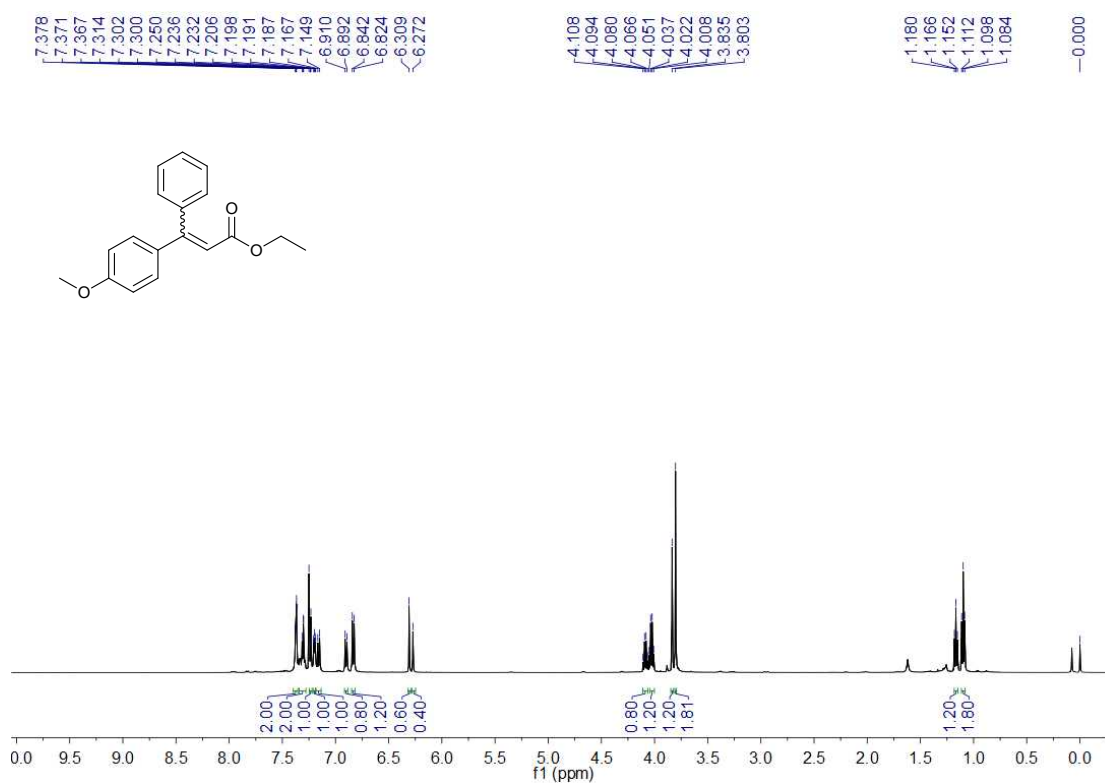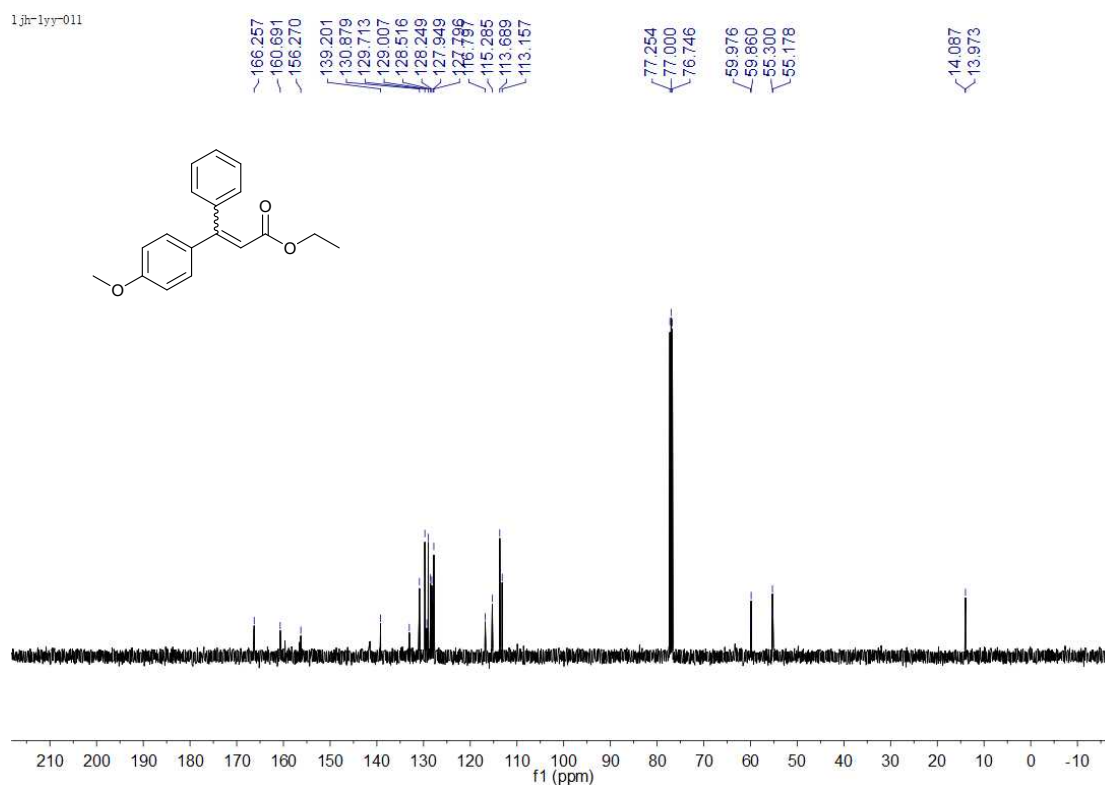

### Ethyl-3-(4-fluorophenyl)-3-phenylacrylate (4pa):

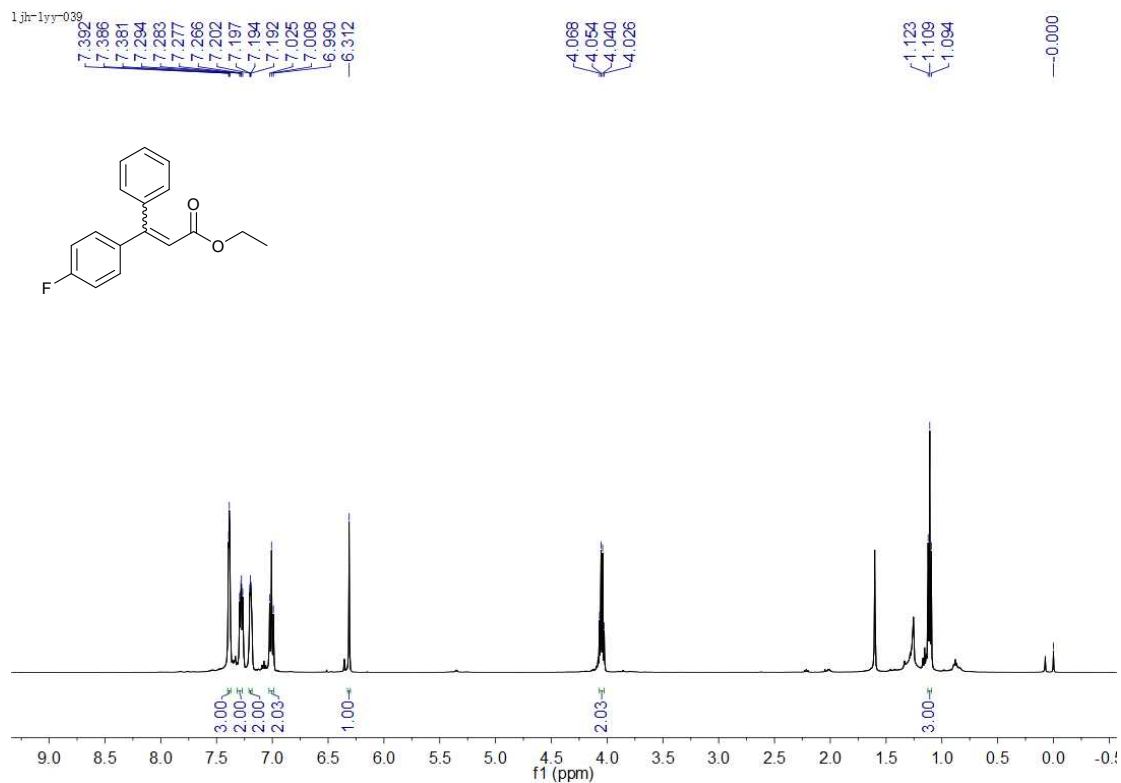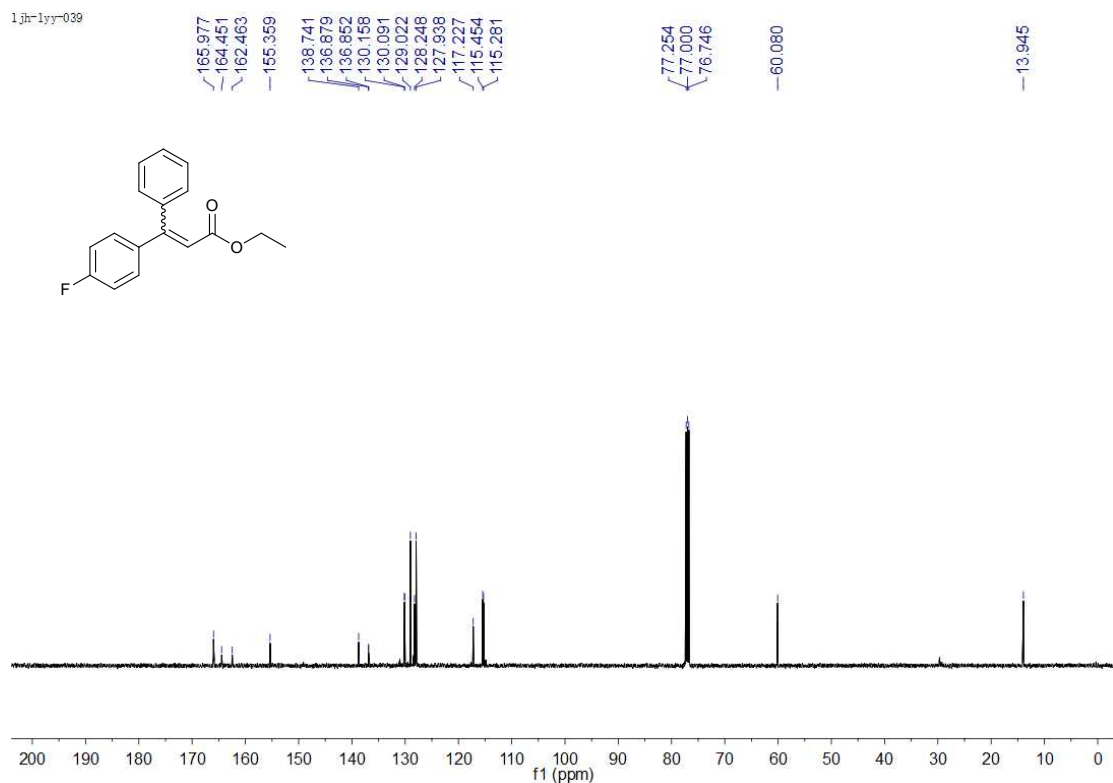

1jht-1yy-039

-111.679

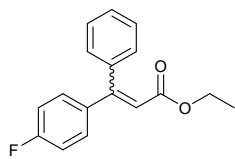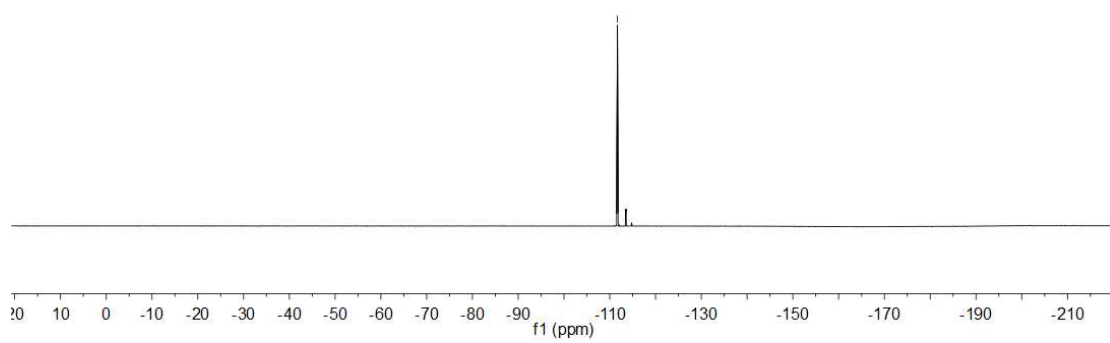

### Ethyl 3,3-diphenylacrylate (4qa):

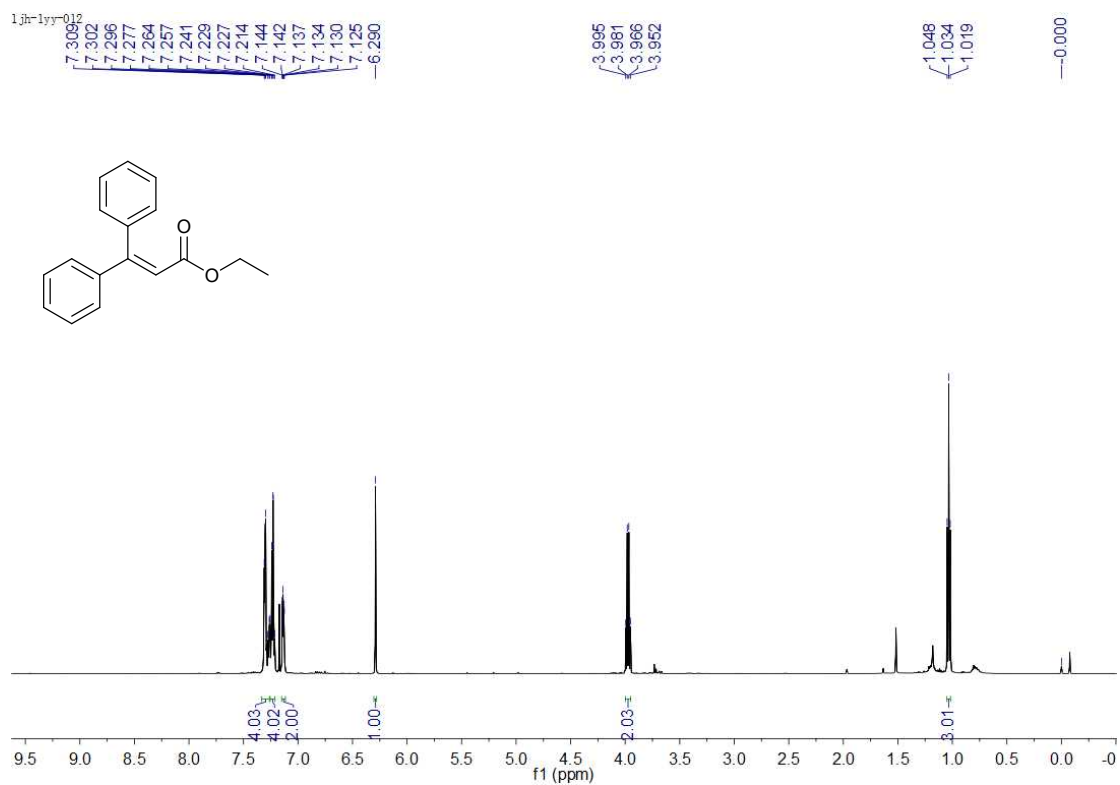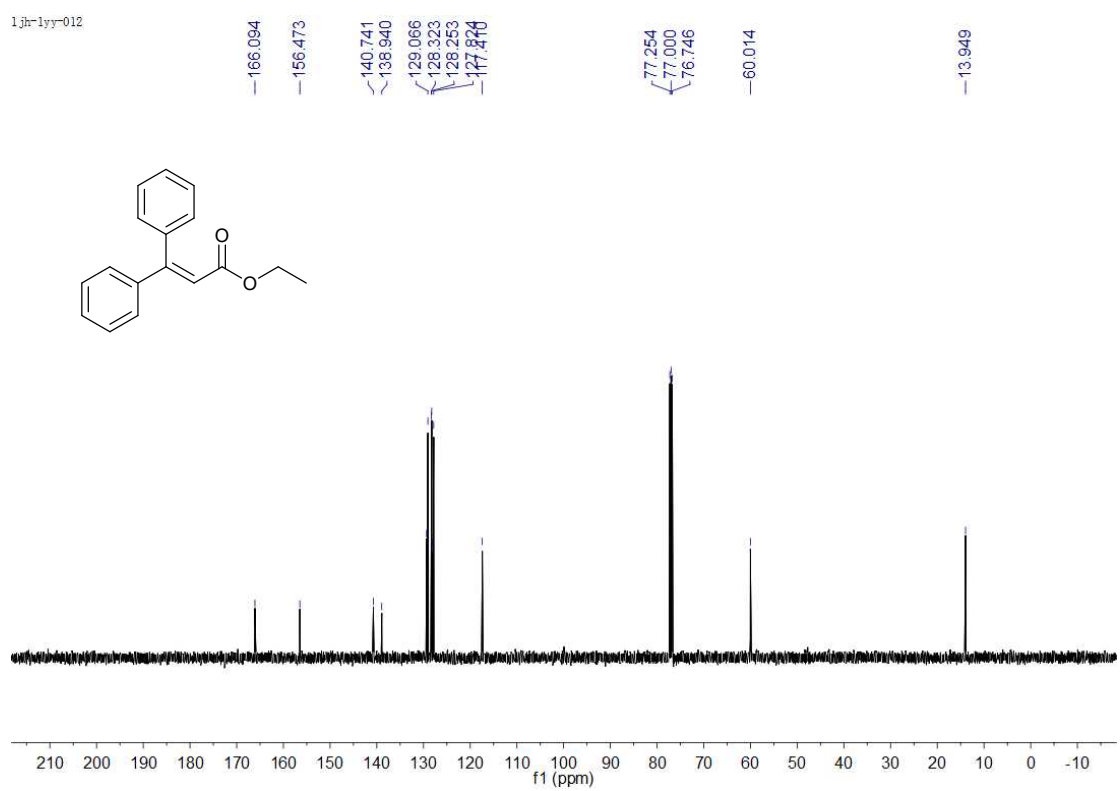

### Ethyl 3,3-di-*p*-tolylacrylate (4ra):

1jh-1yy-019-

7.257  
7.205  
7.189  
7.176  
7.128  
7.111  
7.106  
7.090  
— 6.304

4.085  
4.071  
4.057  
4.043

2.391  
2.352

1.161  
1.147  
1.132

— 0.000

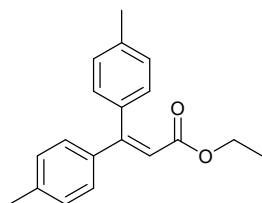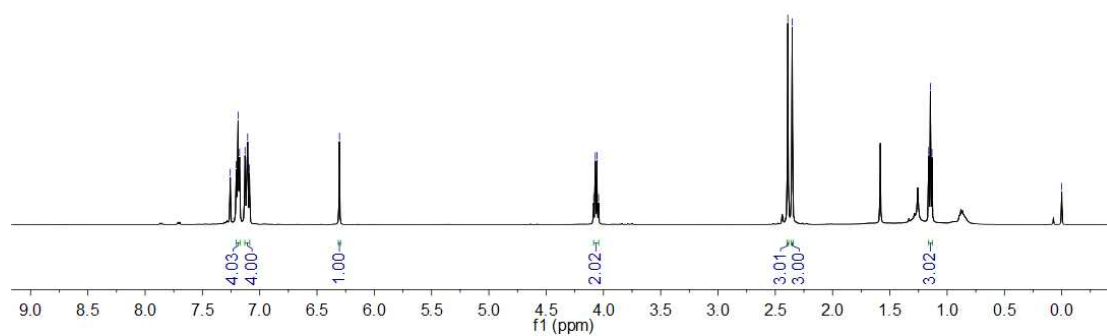

1jh-1yy-020

166.254  
156.908  
139.567  
138.235  
137.880  
136.050  
129.113  
129.014  
128.511  
128.307  
116.103

77.254  
77.000  
76.746

— 59.908

21.377  
21.232  
14.055

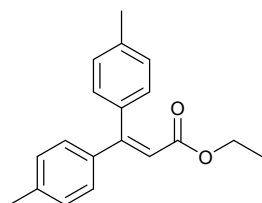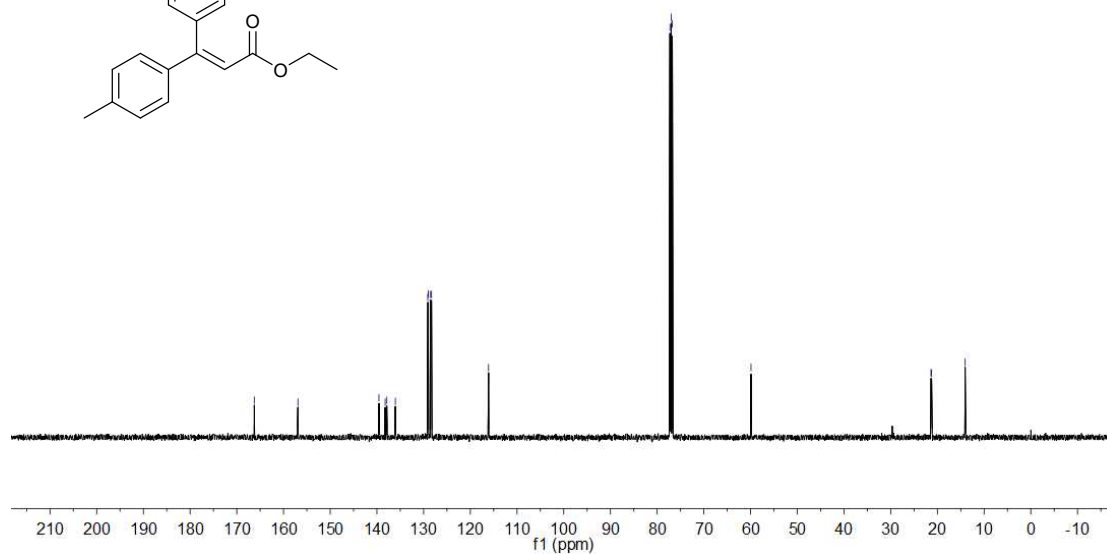

### Ethyl 3,3-bis(4-fluorophenyl)acrylate (4sa):

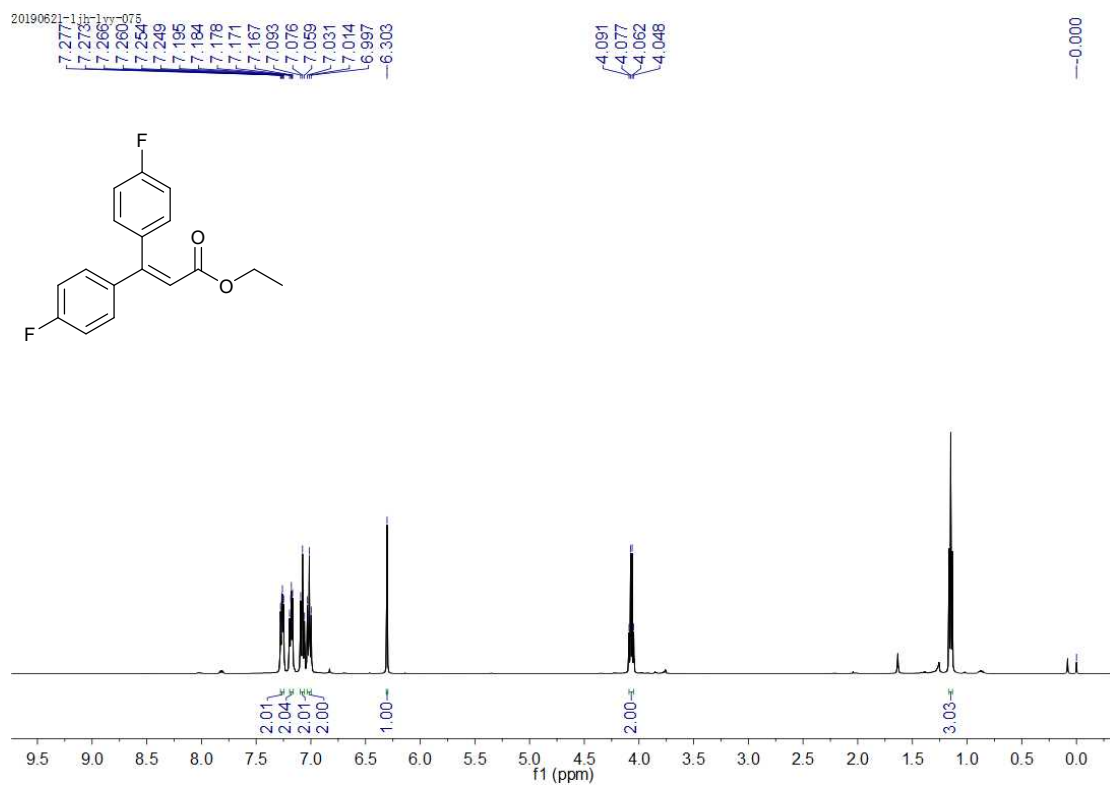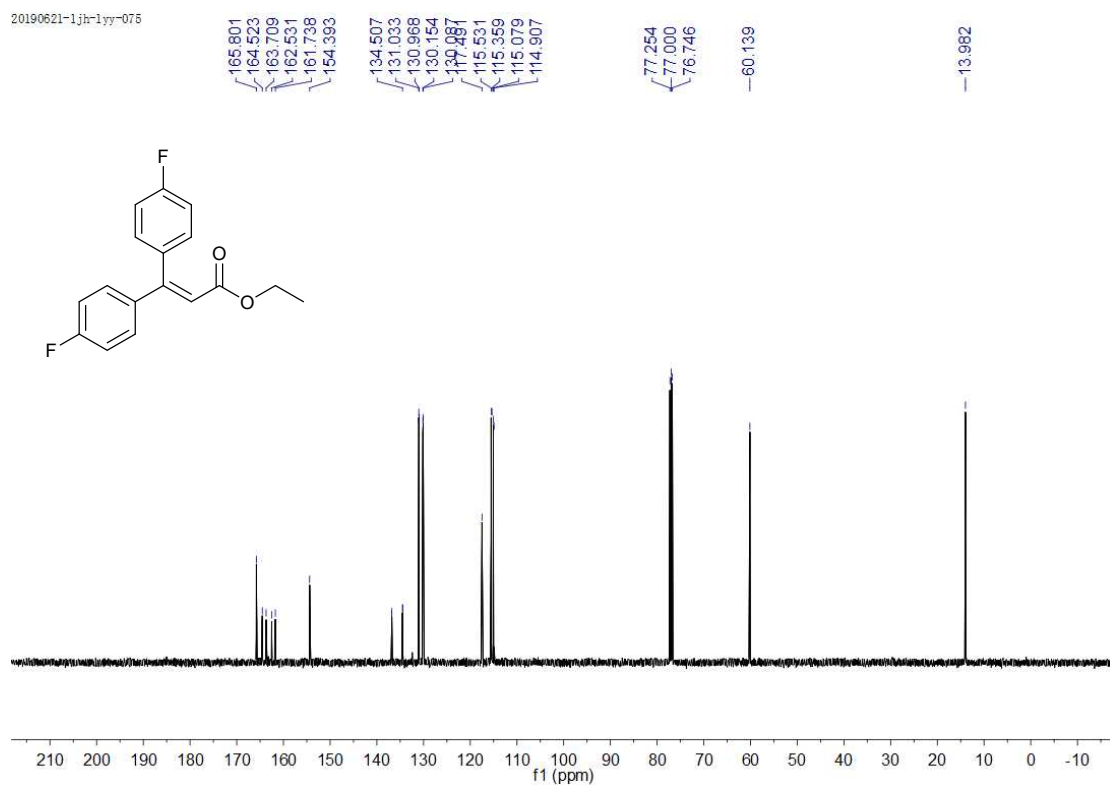



20190621-1jit-1yy-075

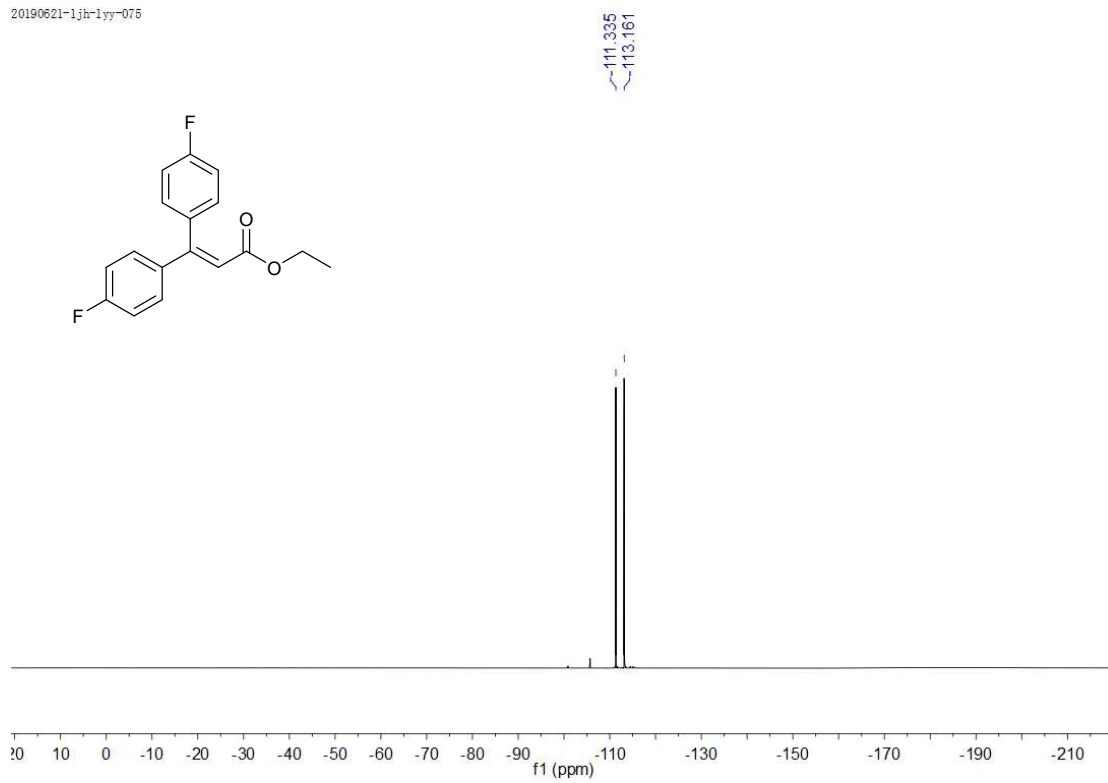

### Ethyl 3,3-bis(4-methoxyphenyl)acrylate (4ta):

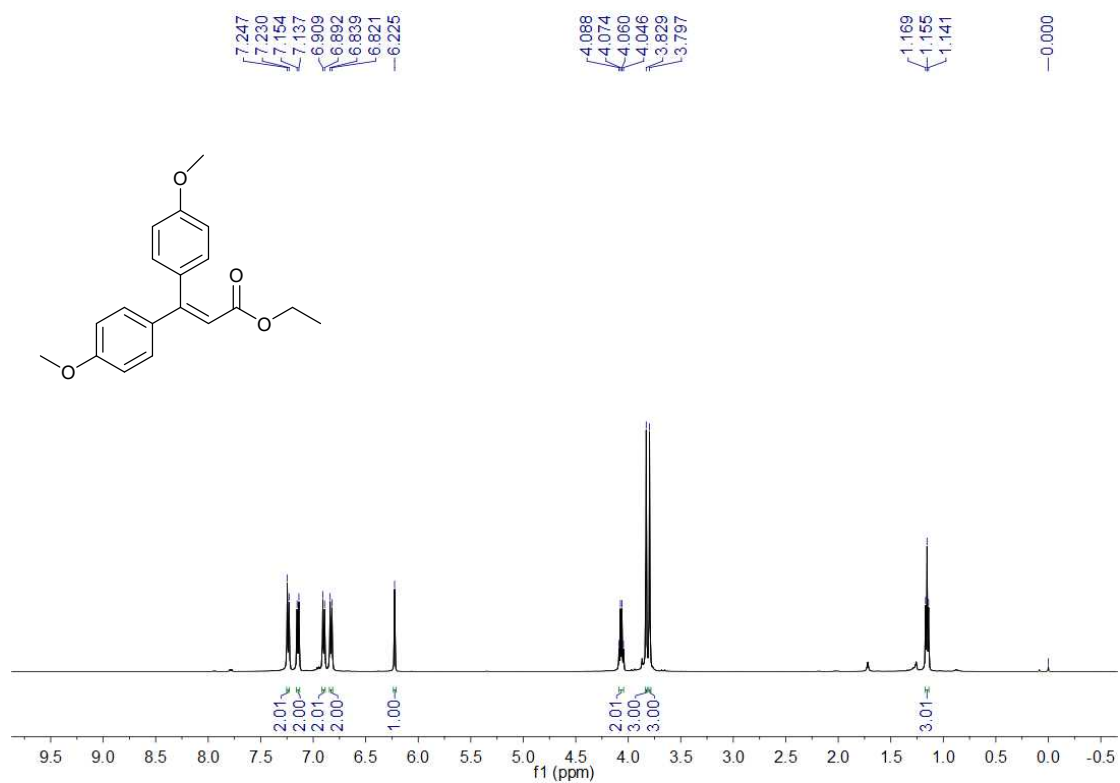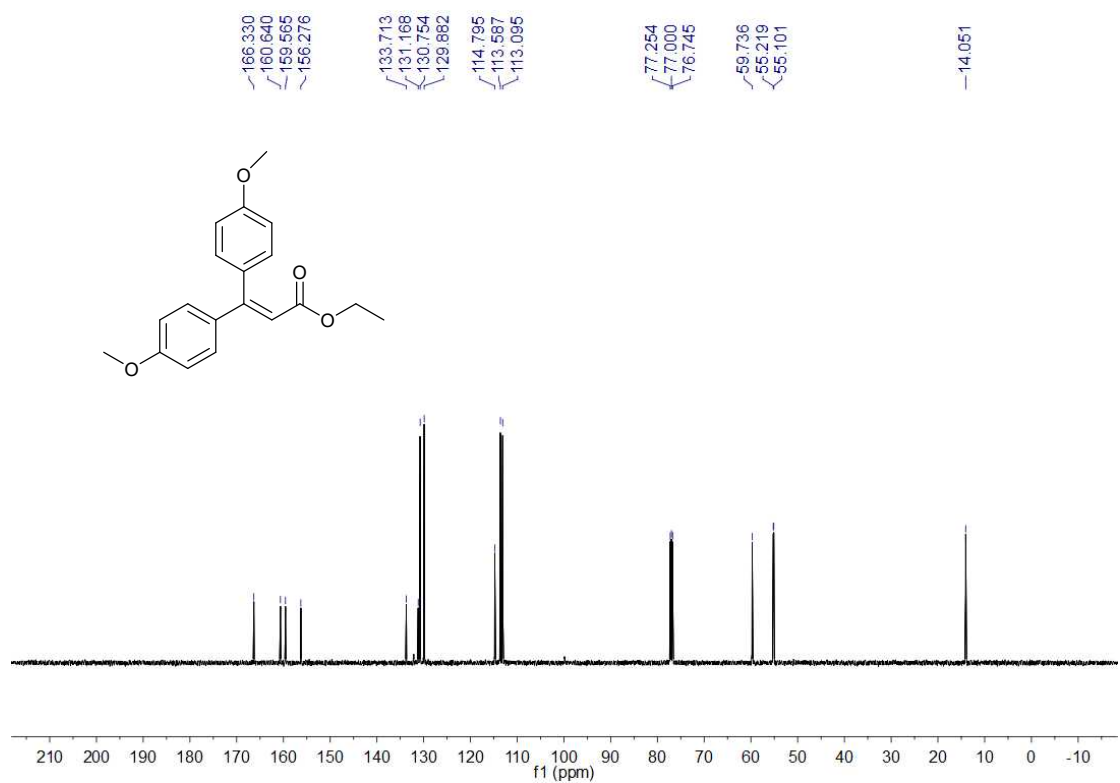

# Ethyl (*E*)-3-(4-methoxyphenyl)-2-methylacrylate (4ua):

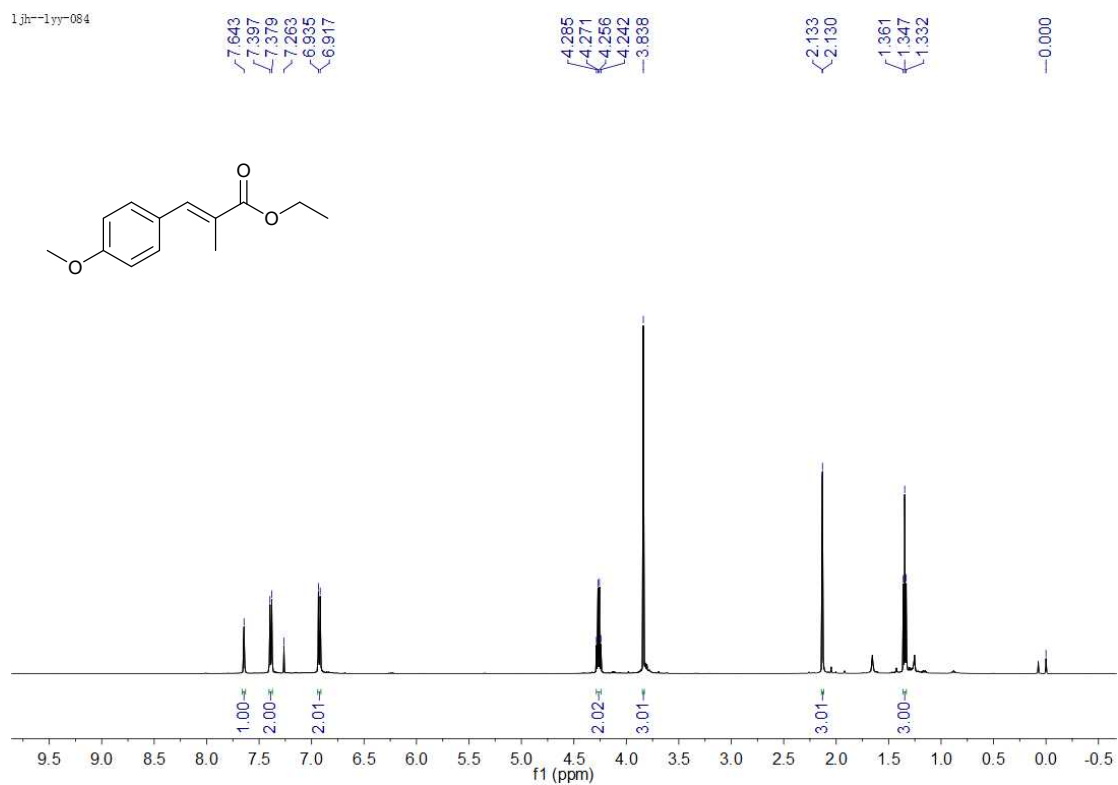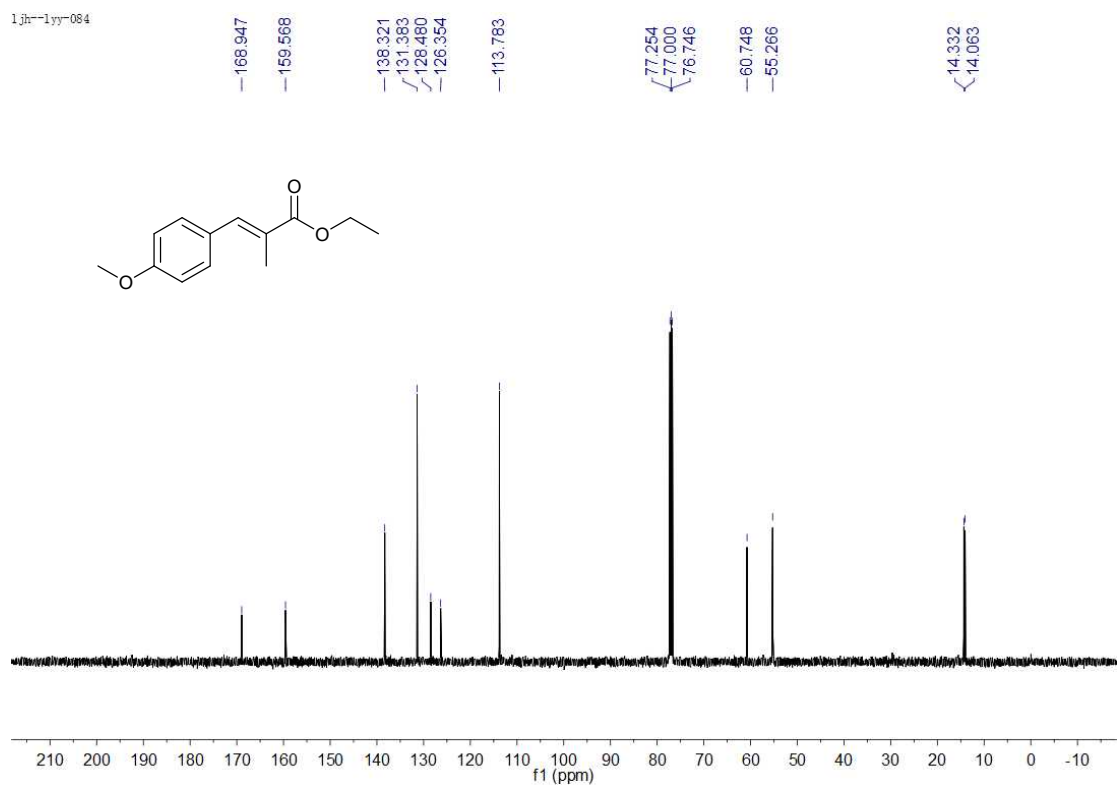

# Ethyl (*E*)-2-methyl-3-(2,4,5-trimethoxyphenyl)acrylate (4va):

20190329-1jh-1yy

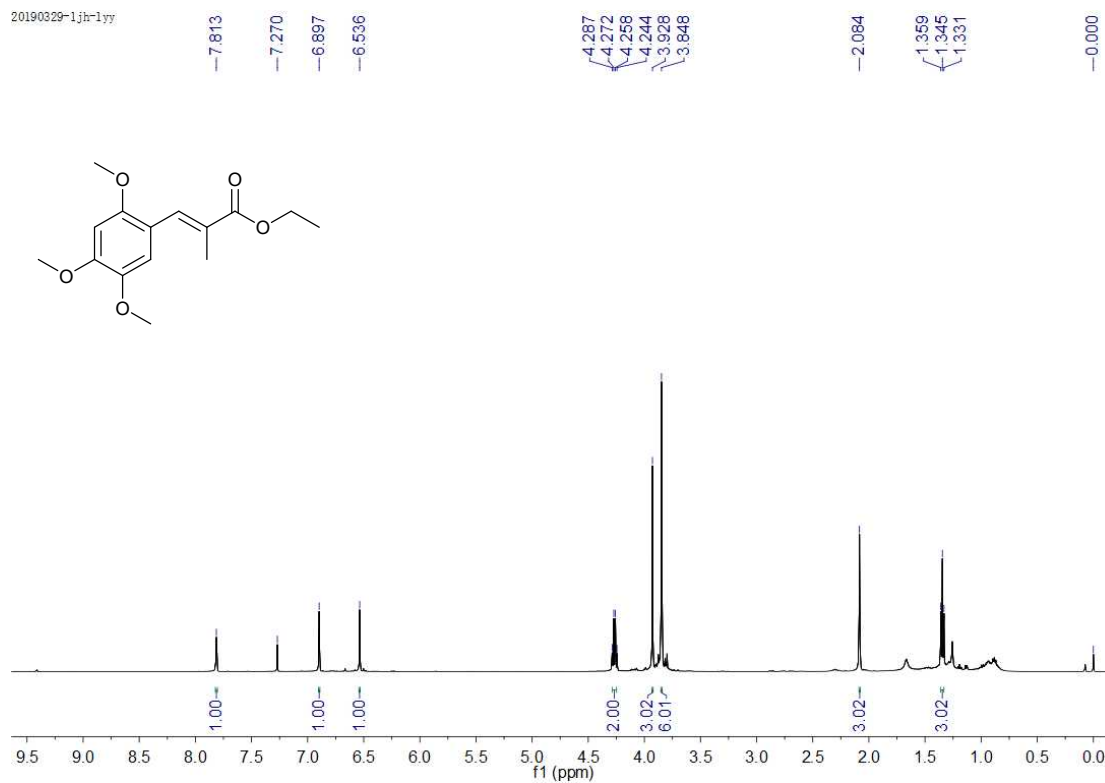

20190329-1jh-1yy

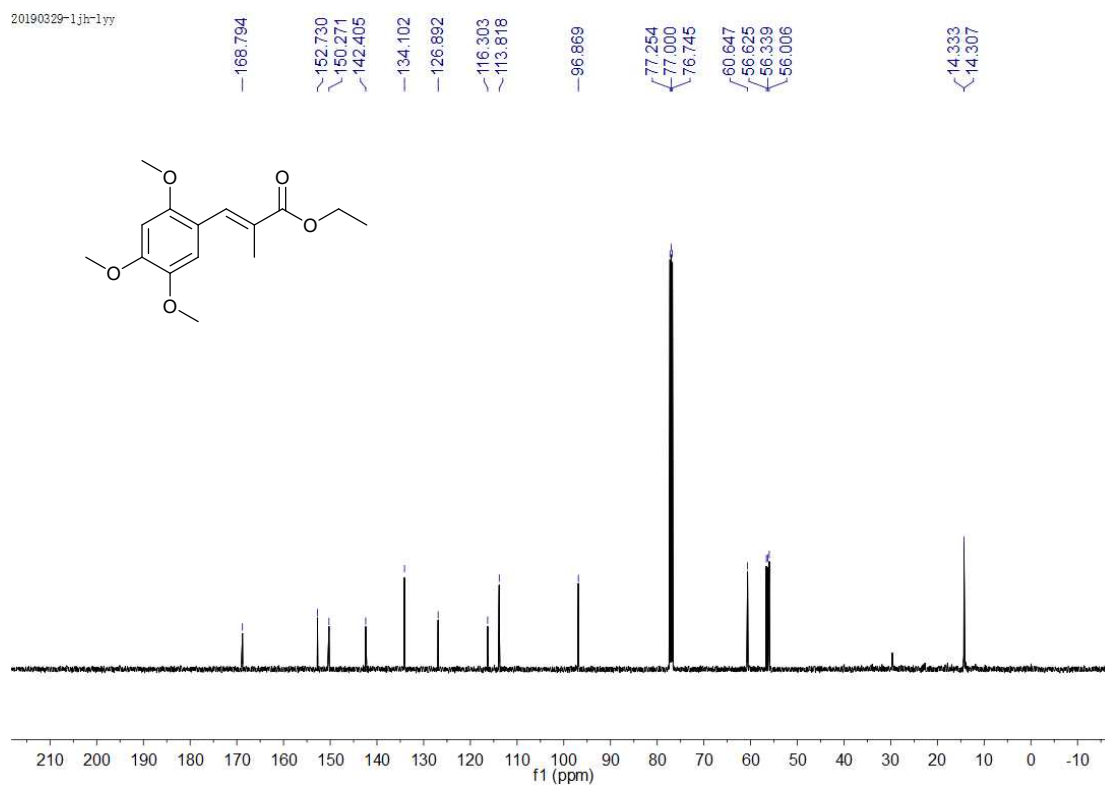

**Ethyl-(*E*)-3-(2,5,7,8-tetramethyl-2-(4,8,12-trimethyltridecyl)chroman-6-yl)acrylate (4wa):**

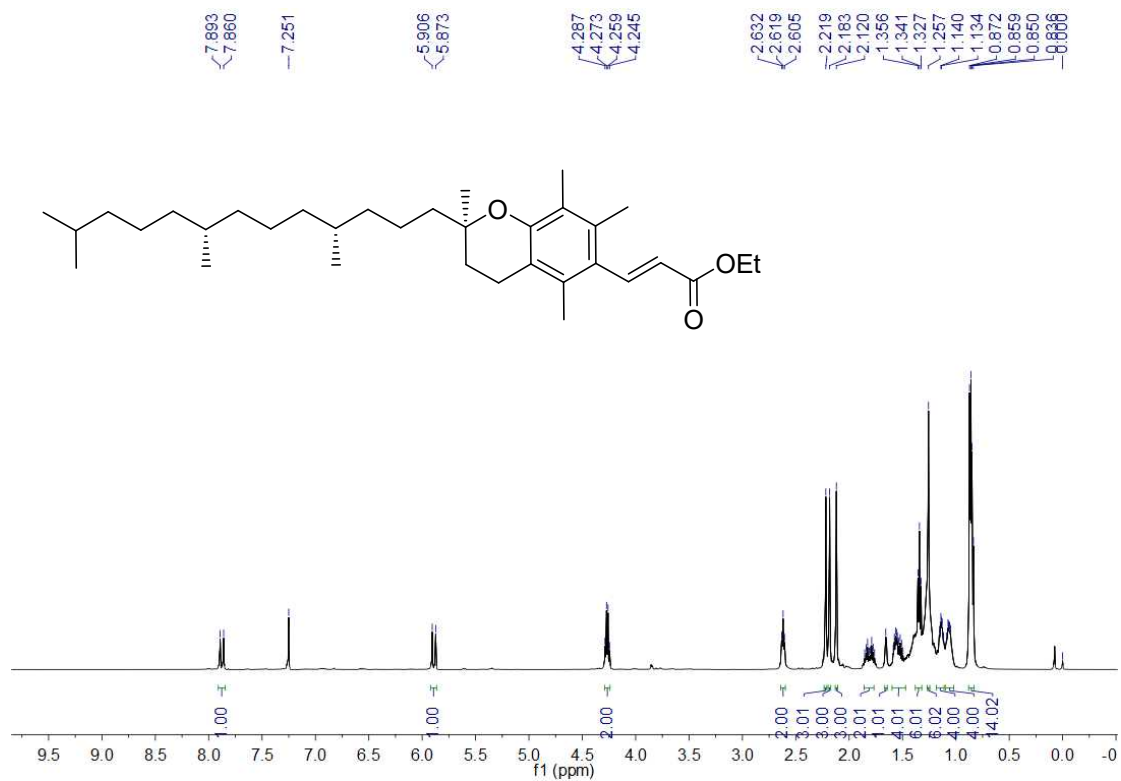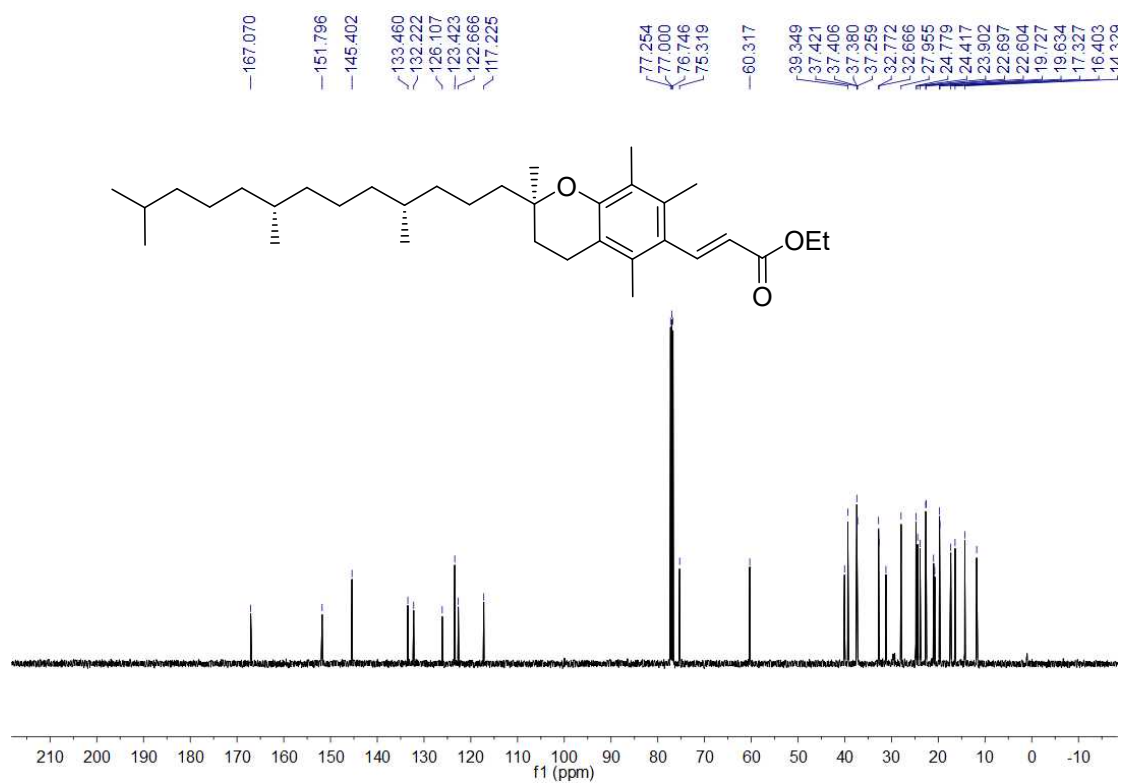

**Ethyl-3-(13-methyl-17-oxo-7,8,9,11,12,13,14,15,16,17-decahydro-6H-cyclopenta[*a*]phenanthren-2-yl)-3-phenylacrylate (4xa):**

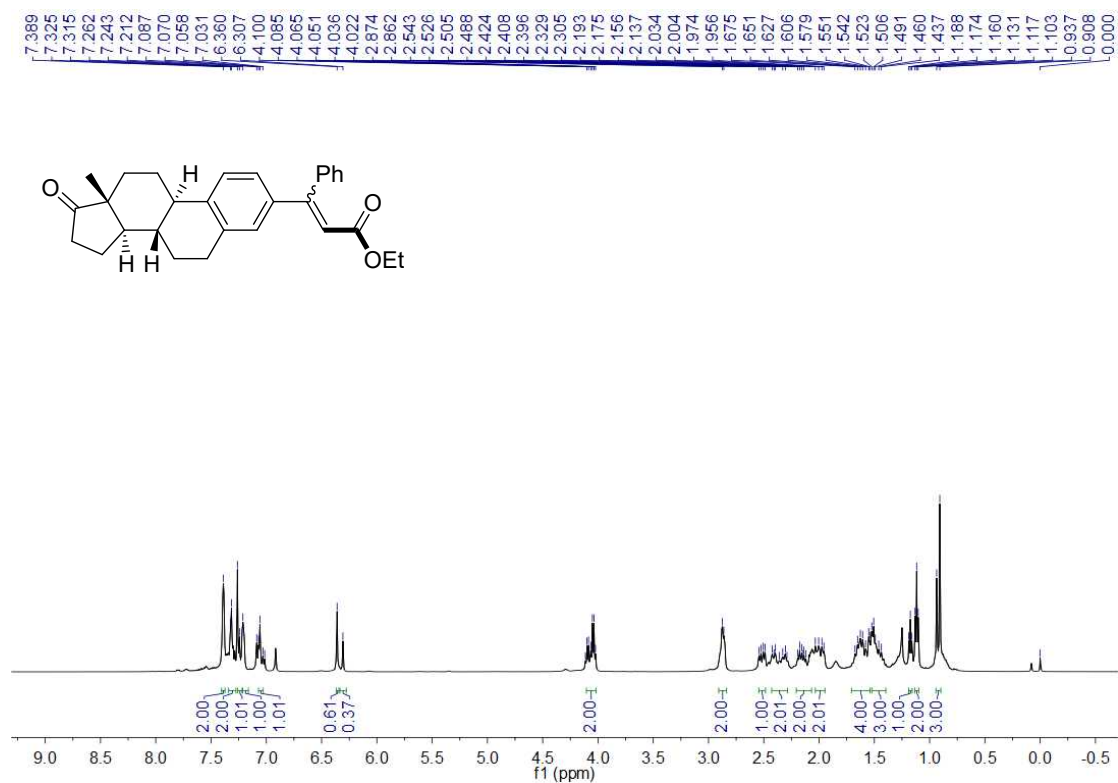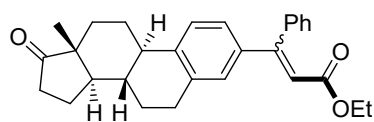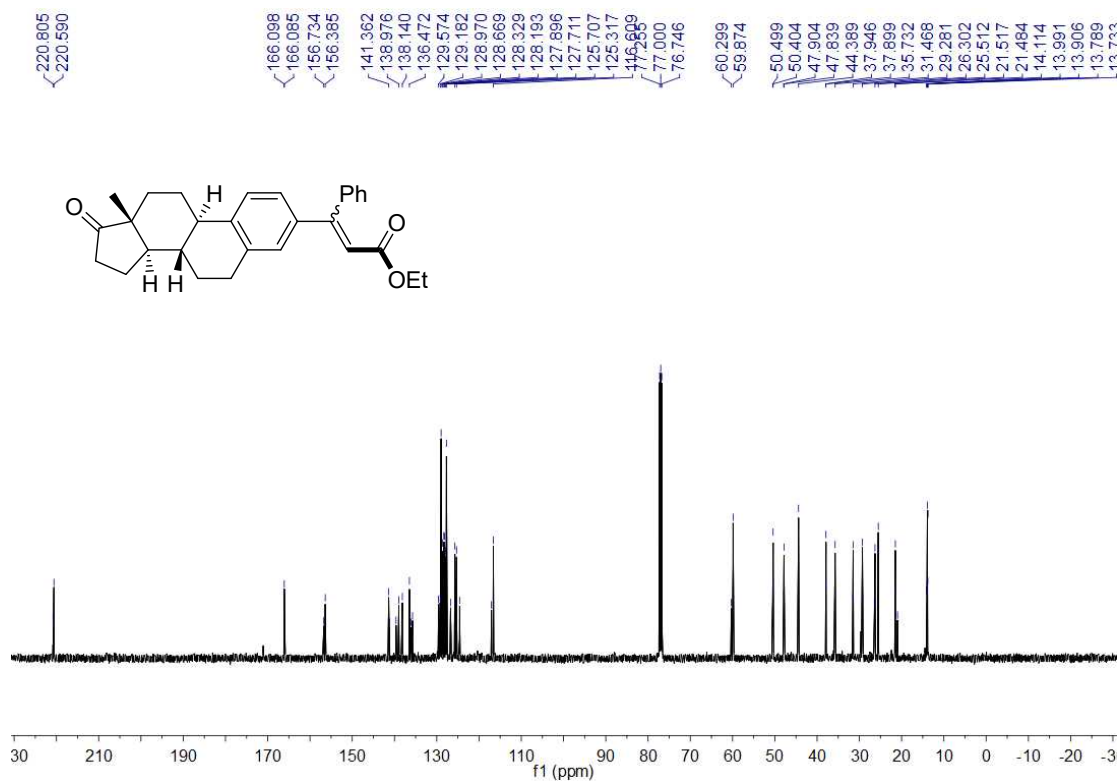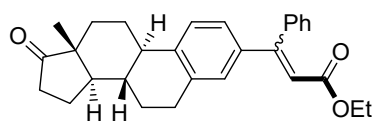

**Ethyl-3-(4-methoxyphenyl)-3-(13-methyl-17-oxo-7,8,9,11,12,13,14,15,16,17-decahydro-6H-cyclopenta[*a*]phenanthren-2-yl)acrylate (4ya):**

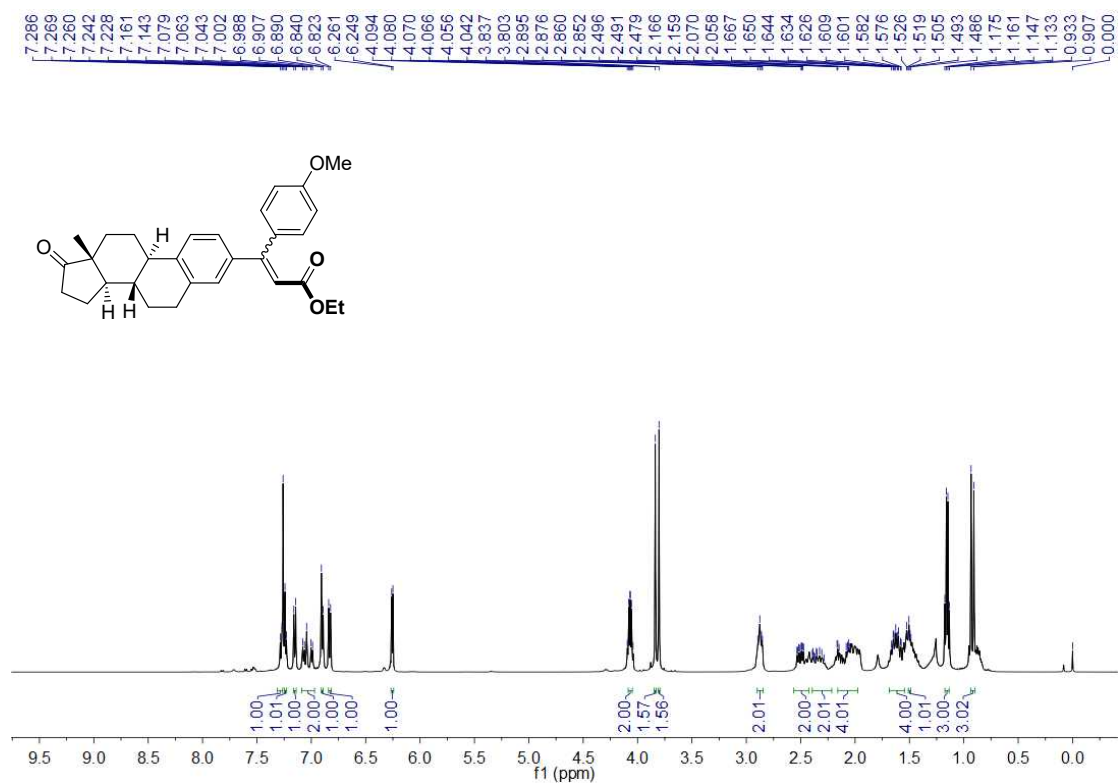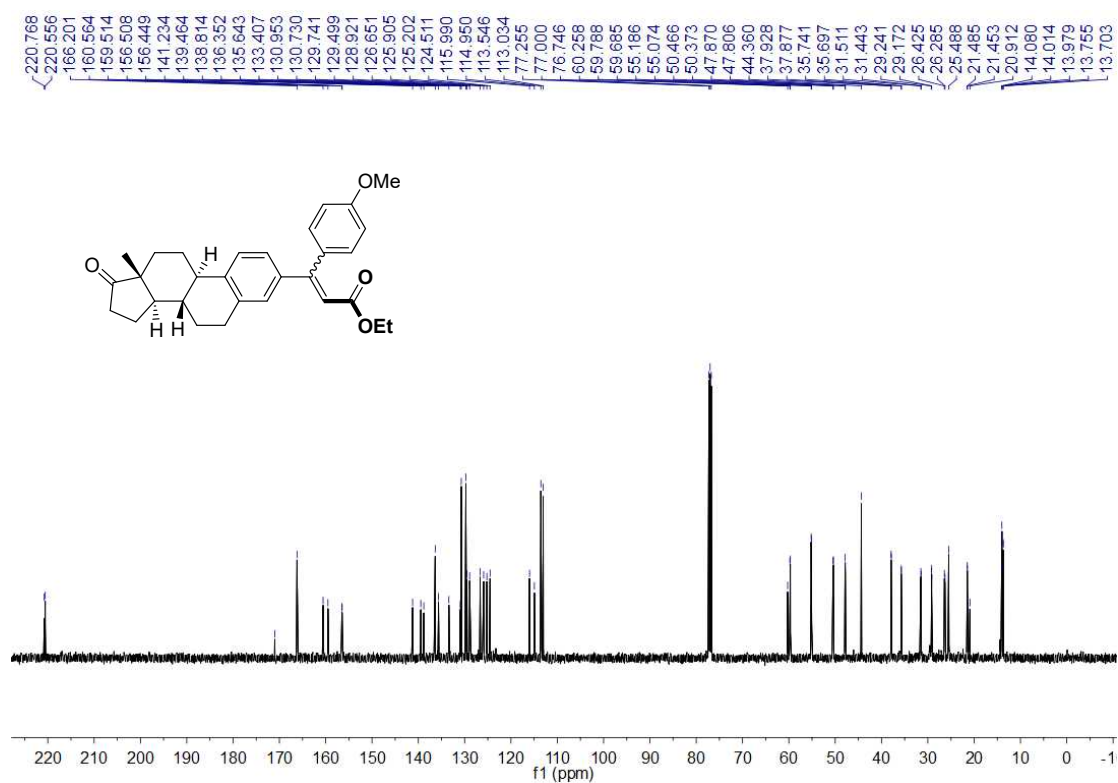

**4-(3-Ethoxy-3-oxo-1-phenylprop-1-en-1-yl)benzyl-(4R)-4-((5S,8R,9S,10S,13R,14S)-10,13-dimethyl-3,7,12-trioxohexadecahydro-1H-cyclopenta[a]phenanthren-17-yl)pentanoate (4za):**

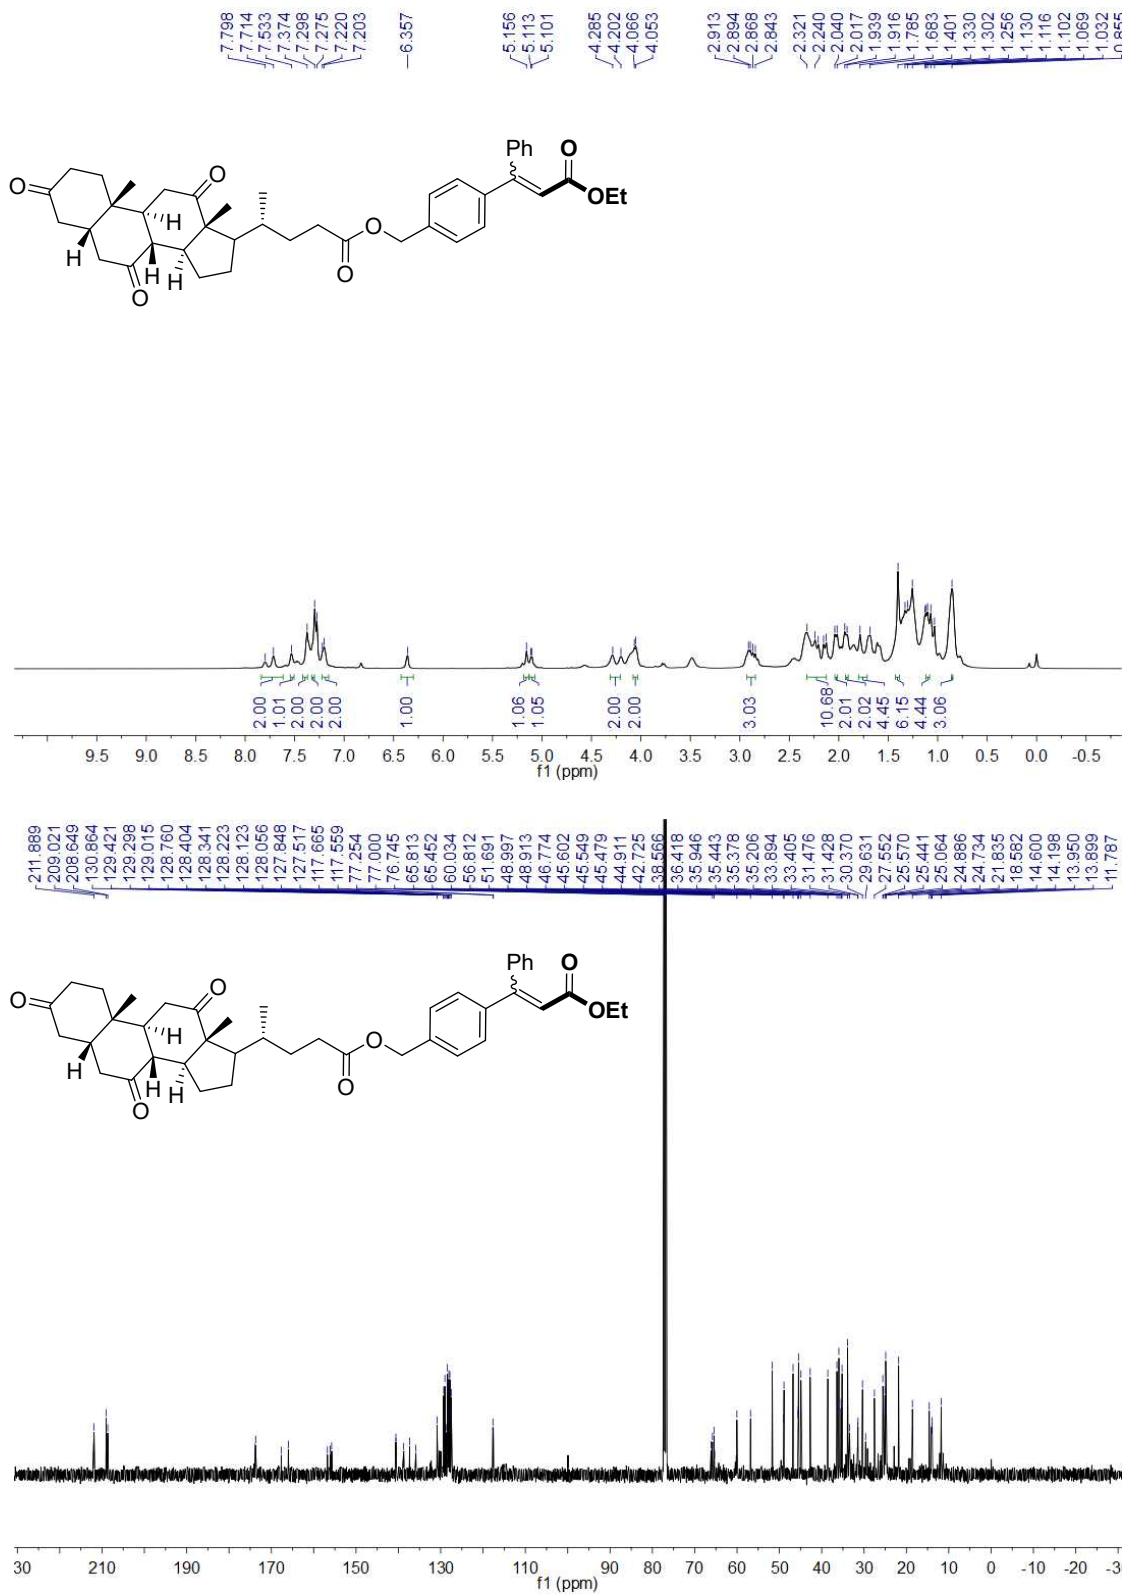



**(E)-3-(4-methoxyphenyl)acrylaldehyde (5a):**

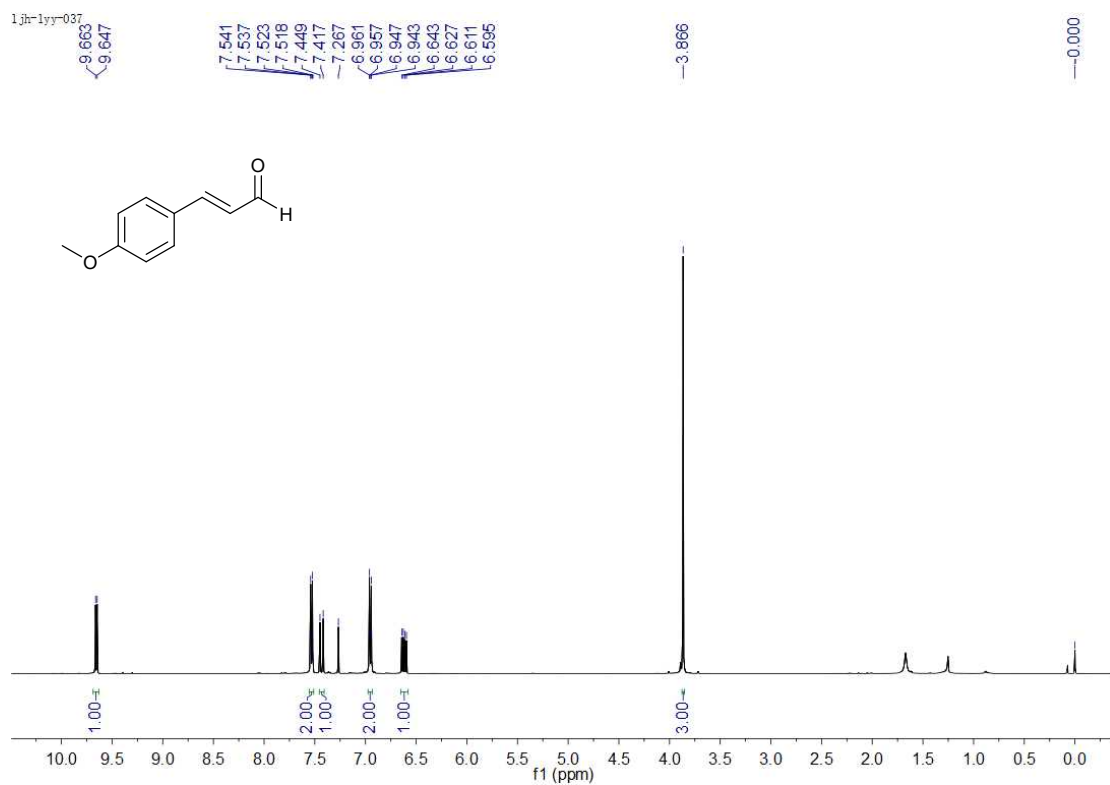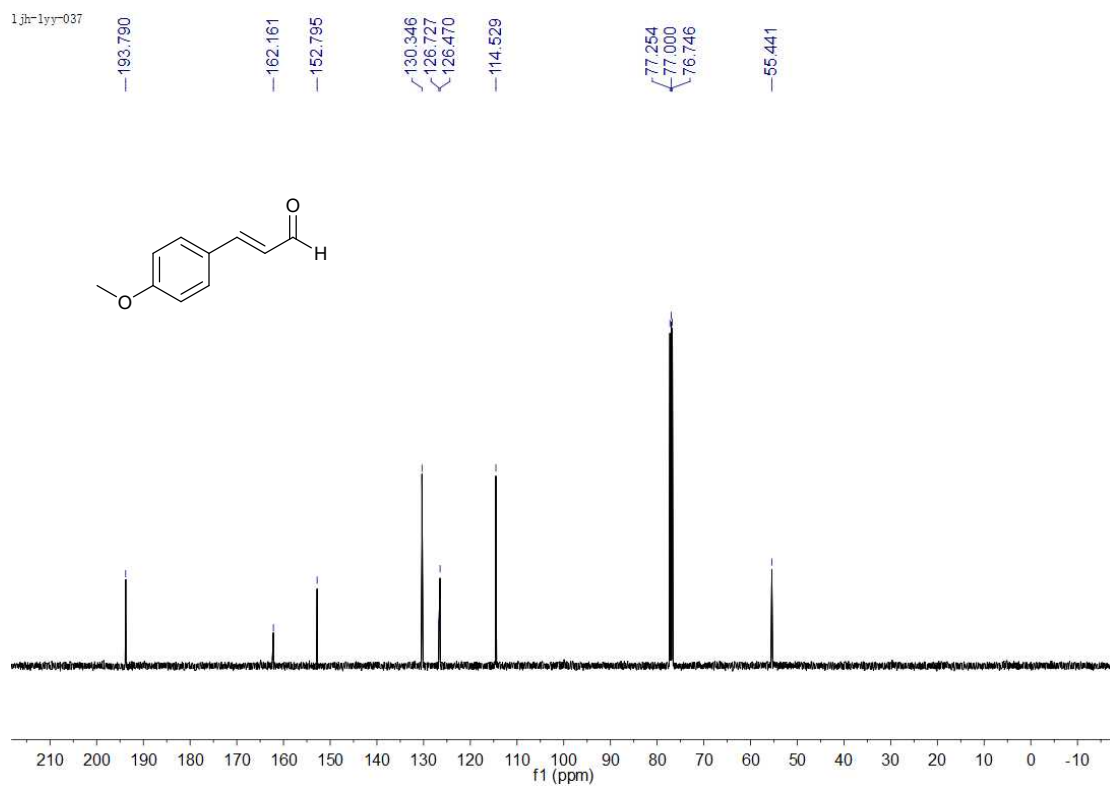

**(E)-3-(4-Ethoxyphenyl)acrylaldehyde (5b):**

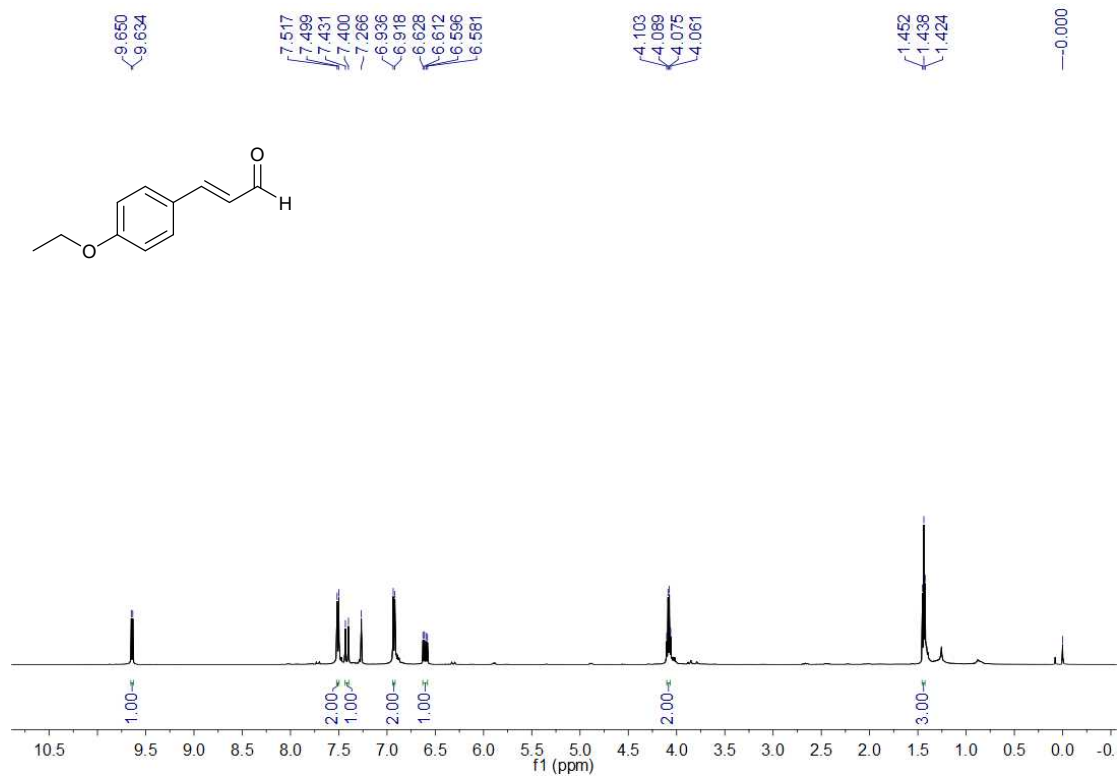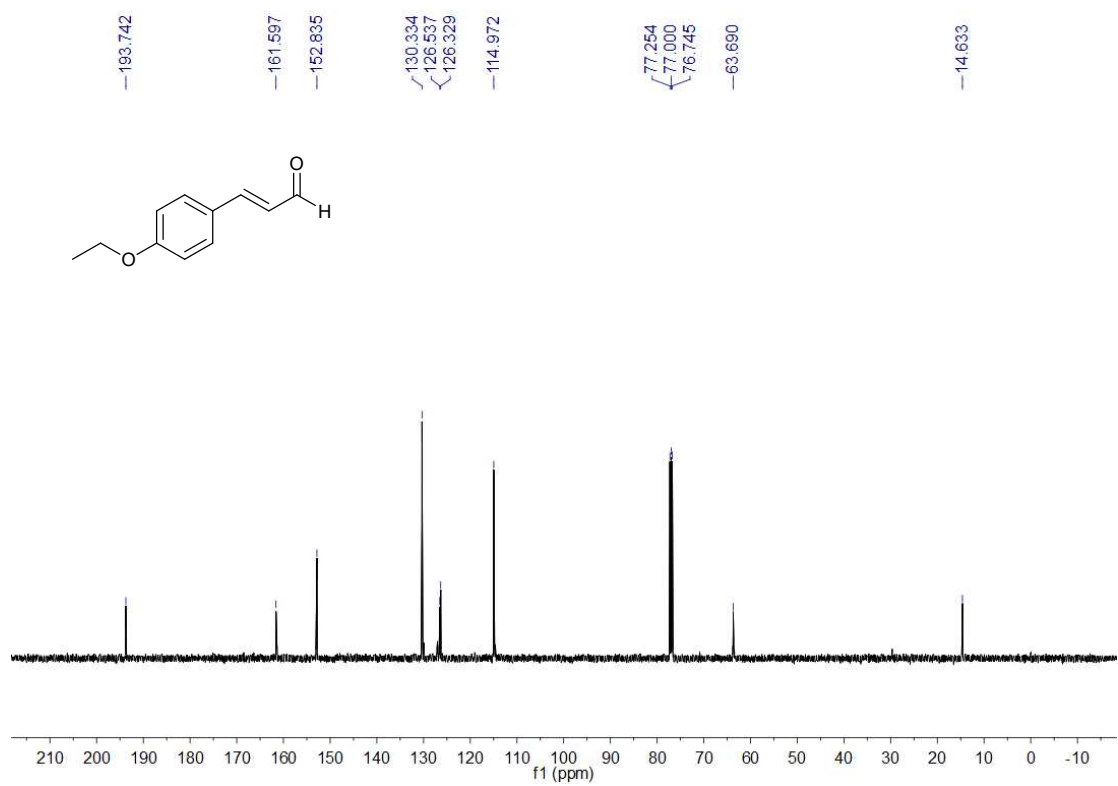

**(E)-3-(2-Methoxyphenyl)acrylaldehyde (5c):**

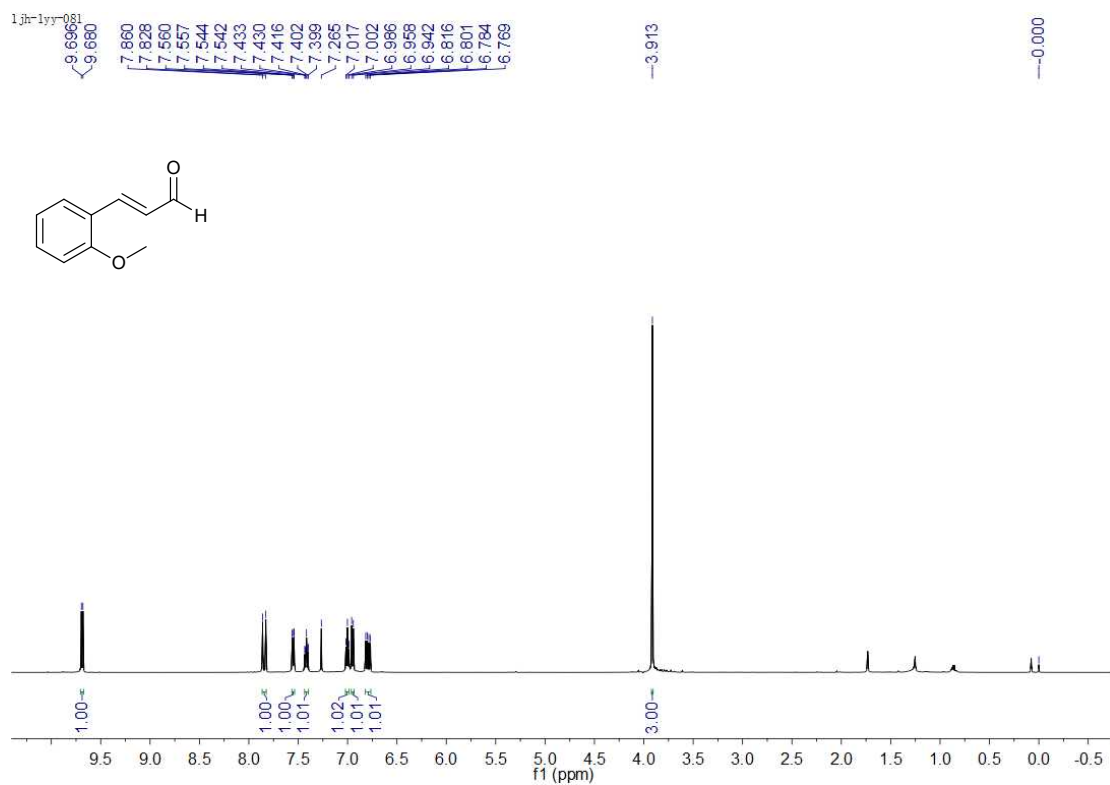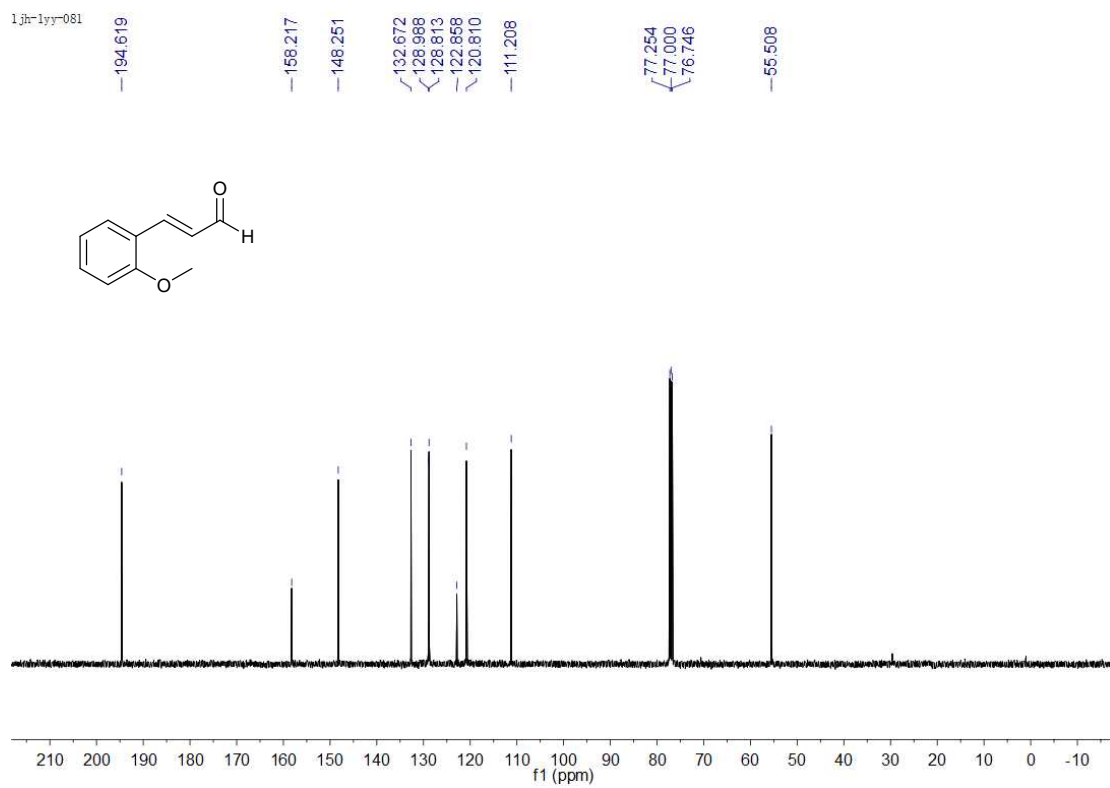

### 3-(Naphthalen-2-yl)-3-phenylacrylaldehyde (5d):

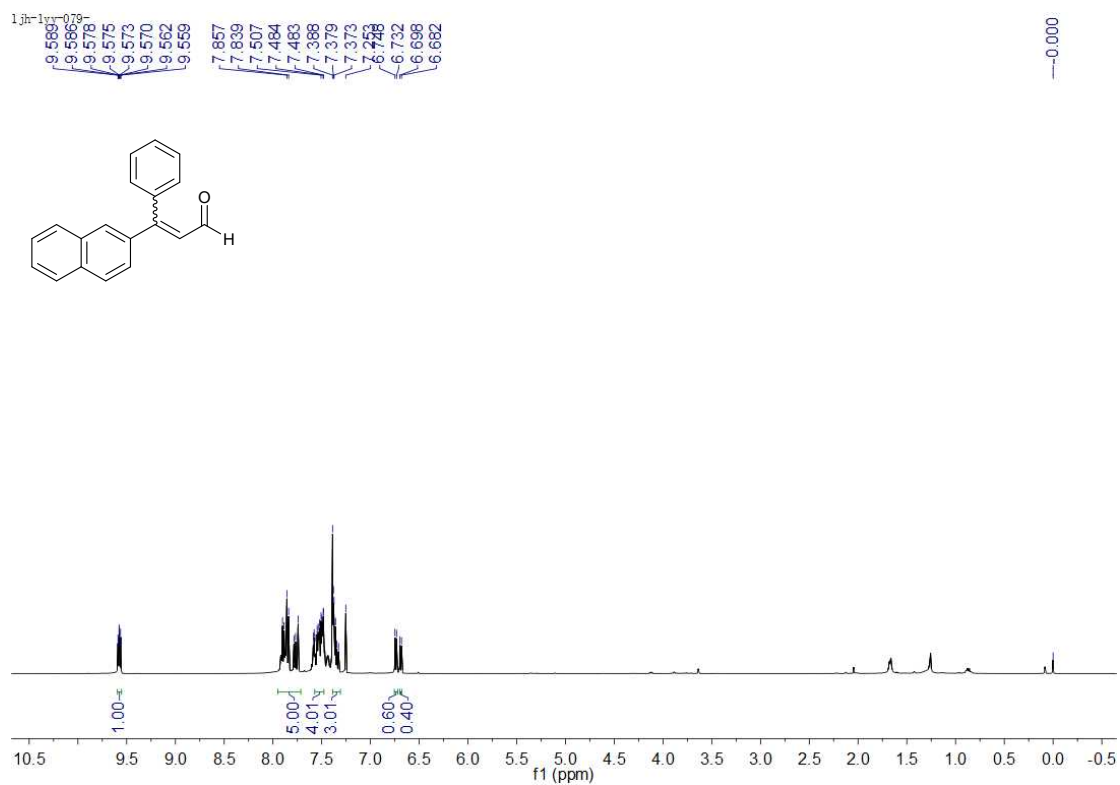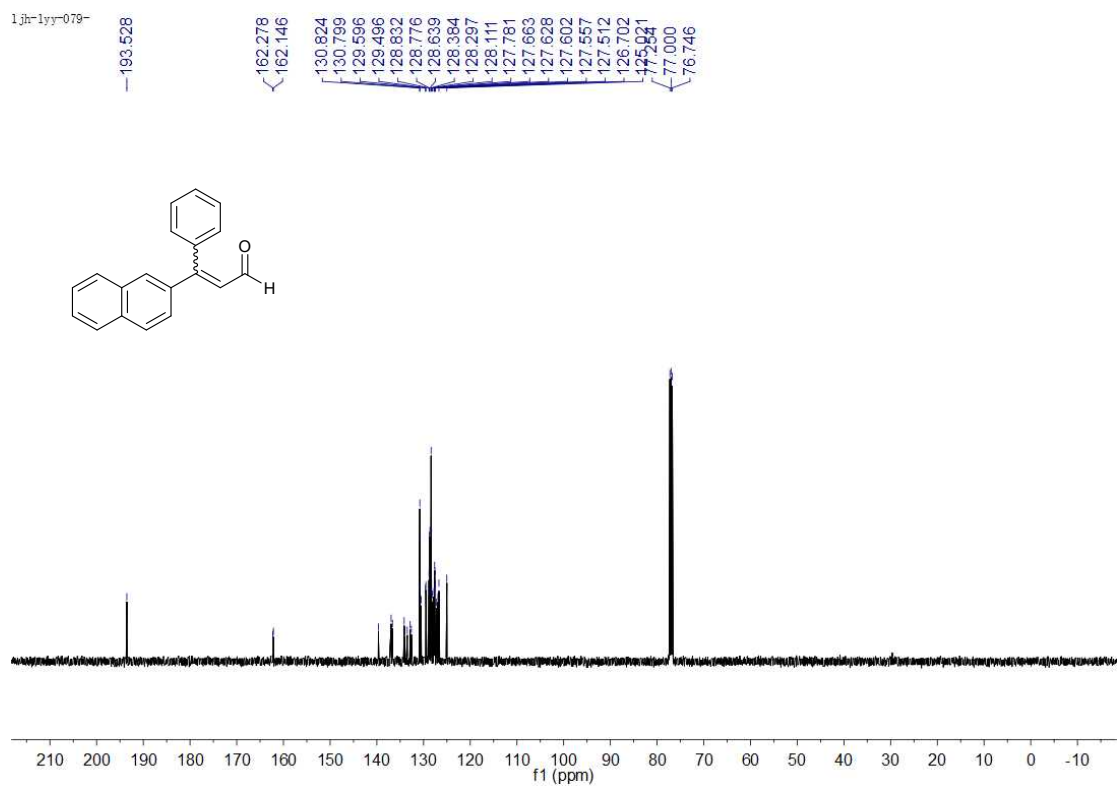

### 3,3-Diphenylacrylaldehyde (5e):

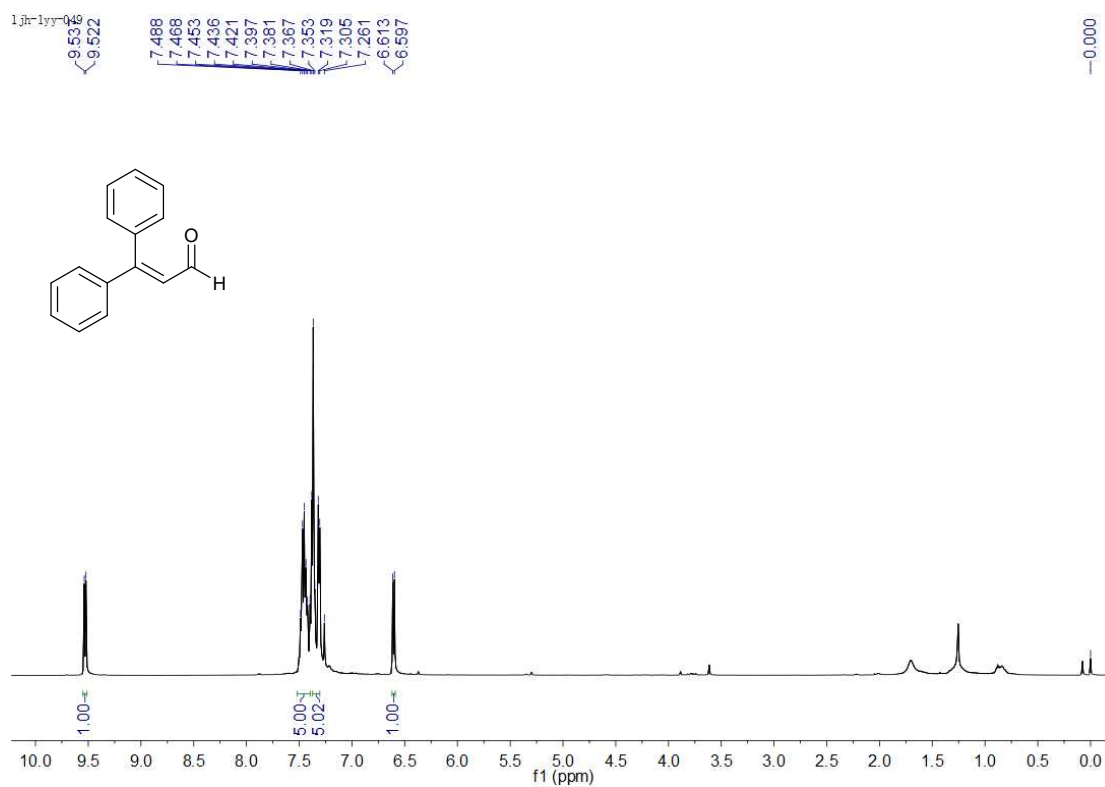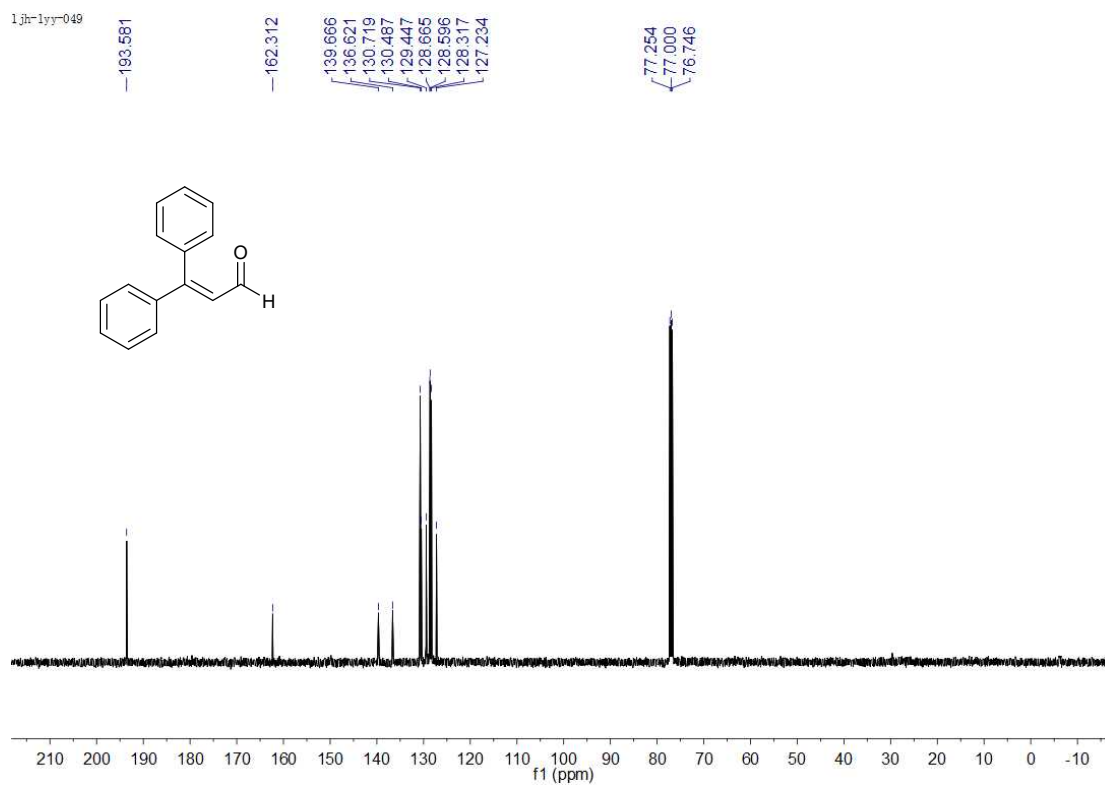

### 3,3-Di-*p*-tolylacrylaldehyde (5f):

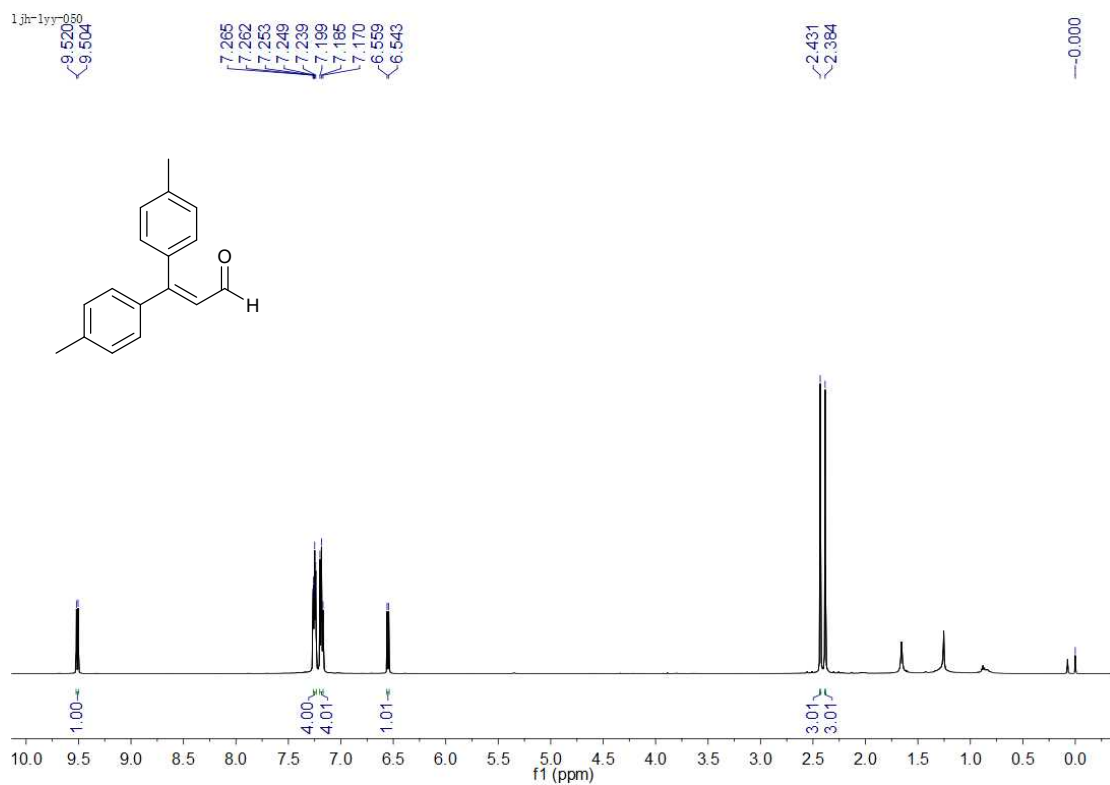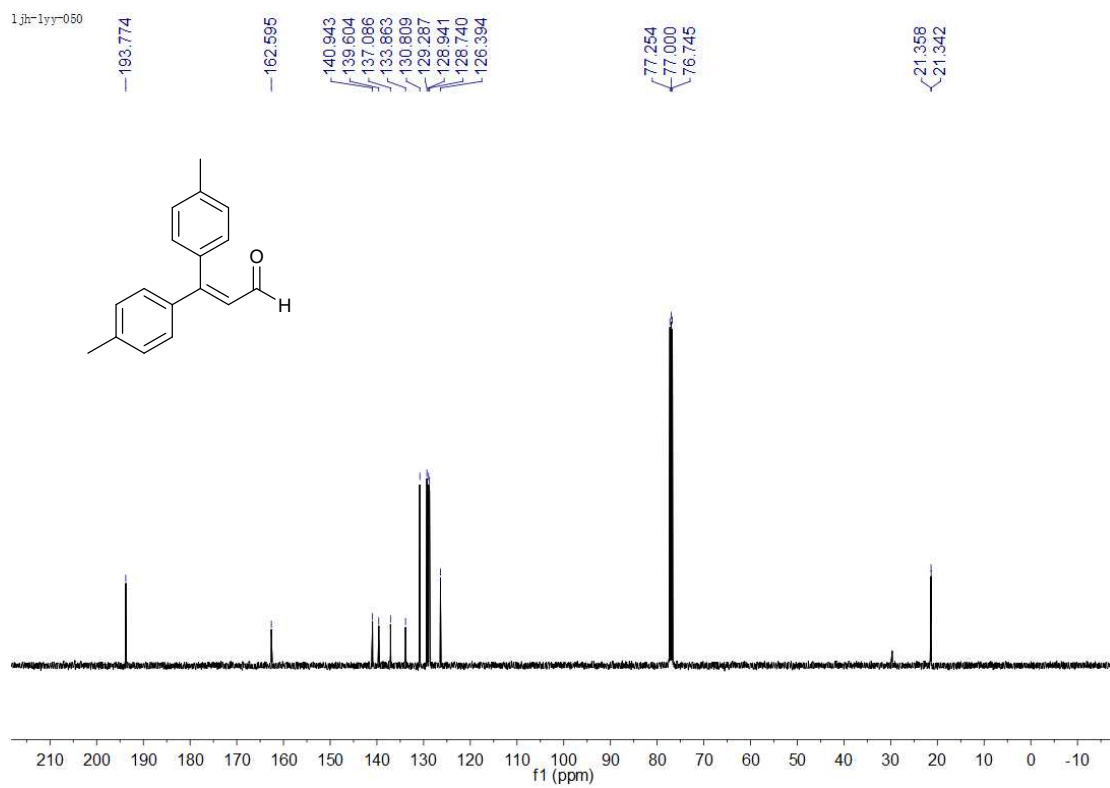

### 3,3-Bis(4-fluorophenyl)acrylaldehyde (5g):

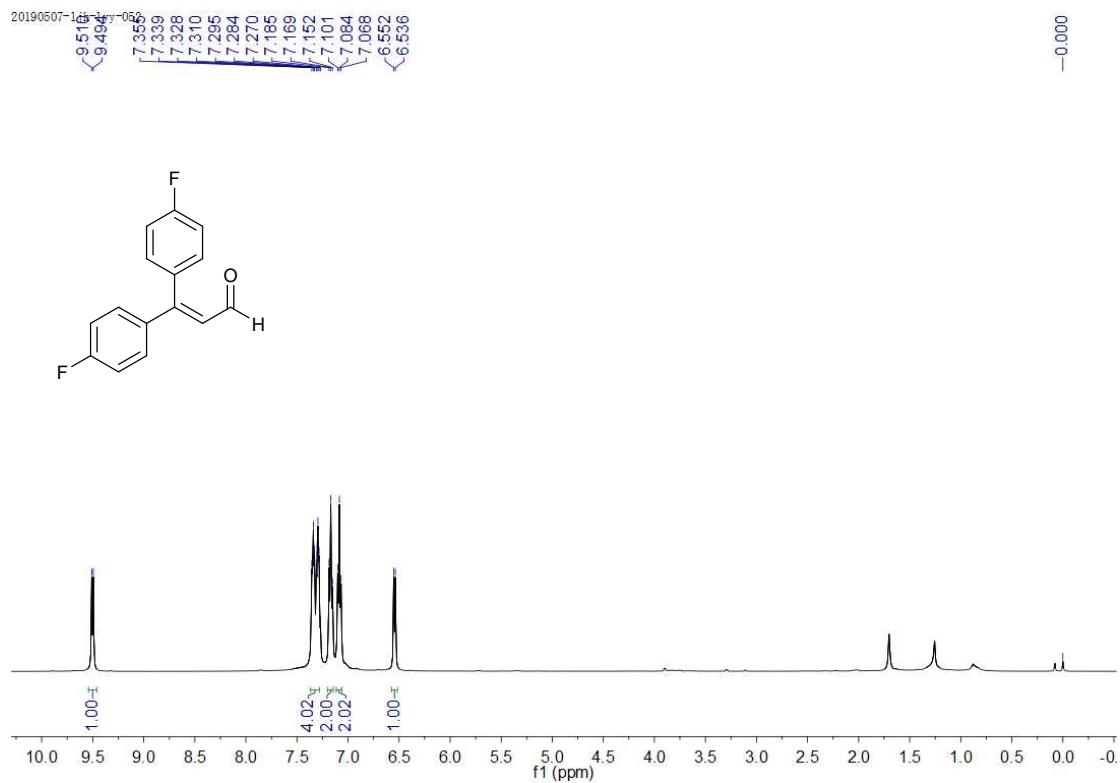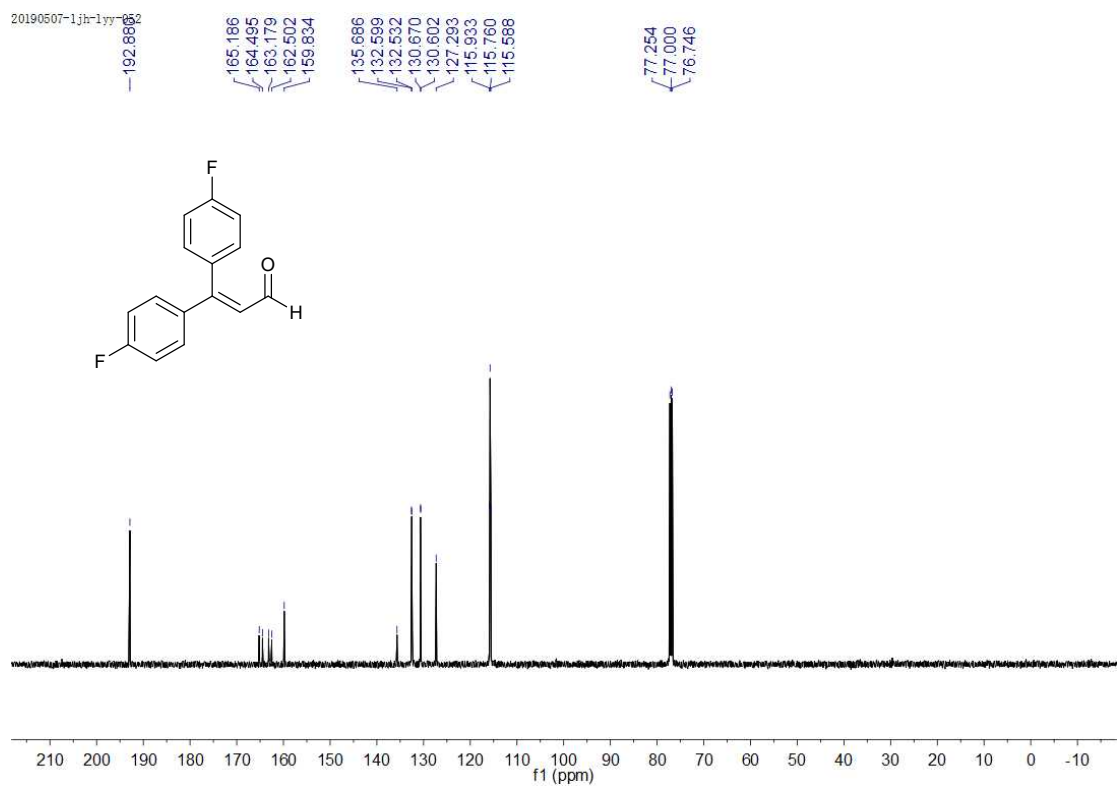

20190507-1jit-1yy-052

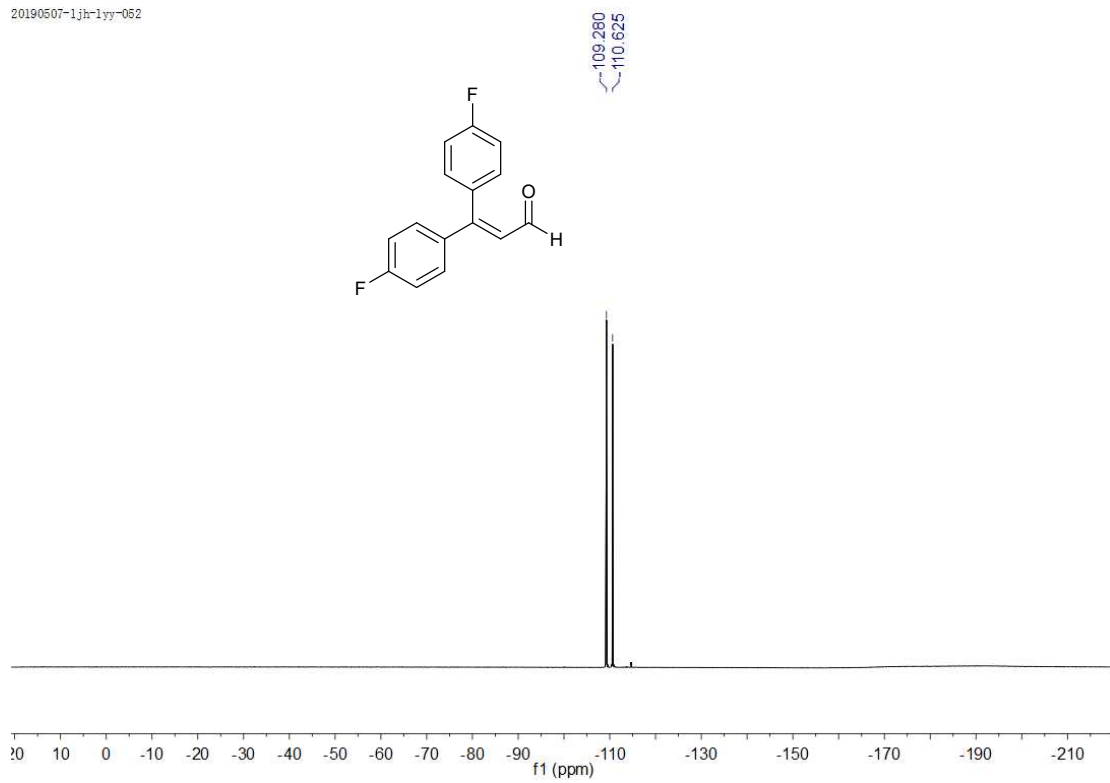



### 3-(4-Bromophenyl)-3-phenylacrylaldehyde (5h):

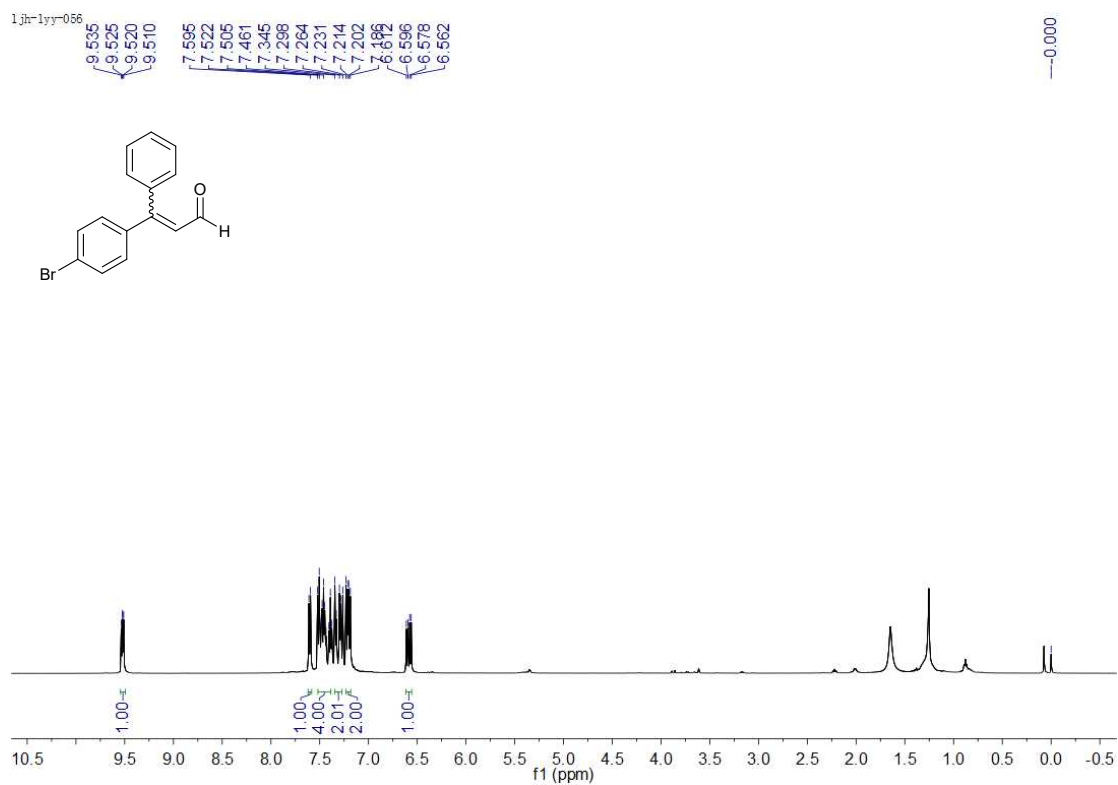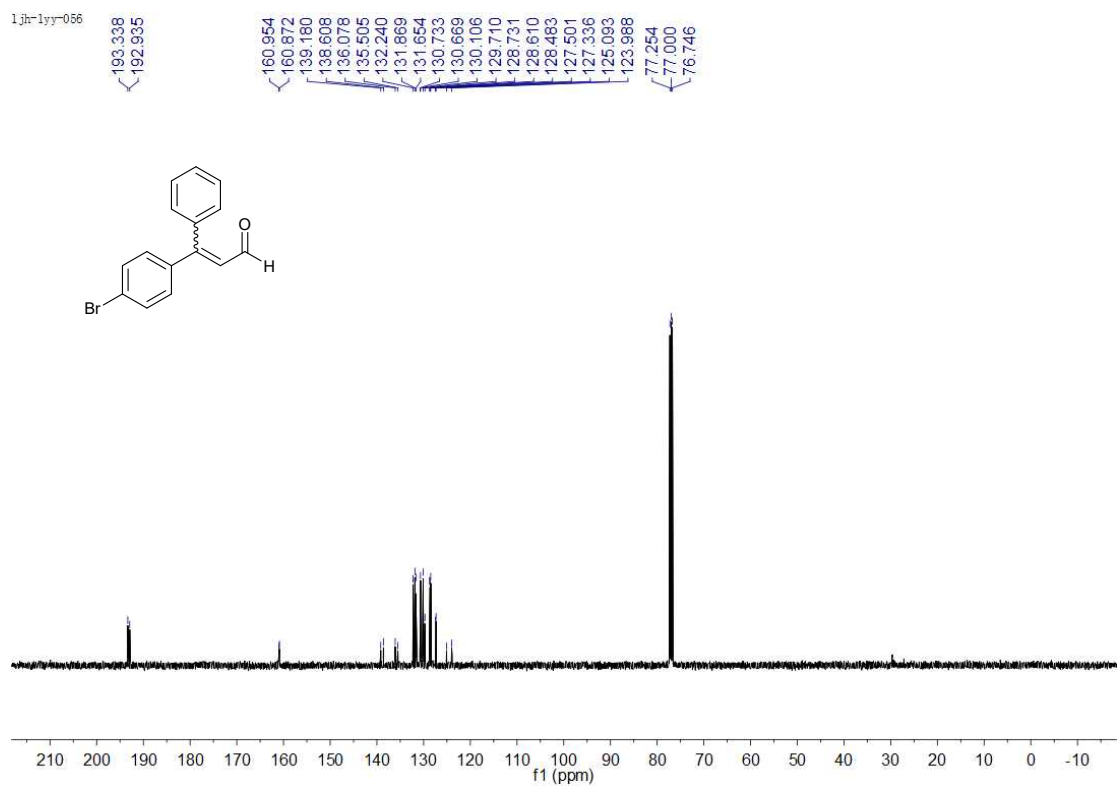



# 1-(3,3-dichloro-1-ethoxyallyl)-4-methoxybenzene (7a)

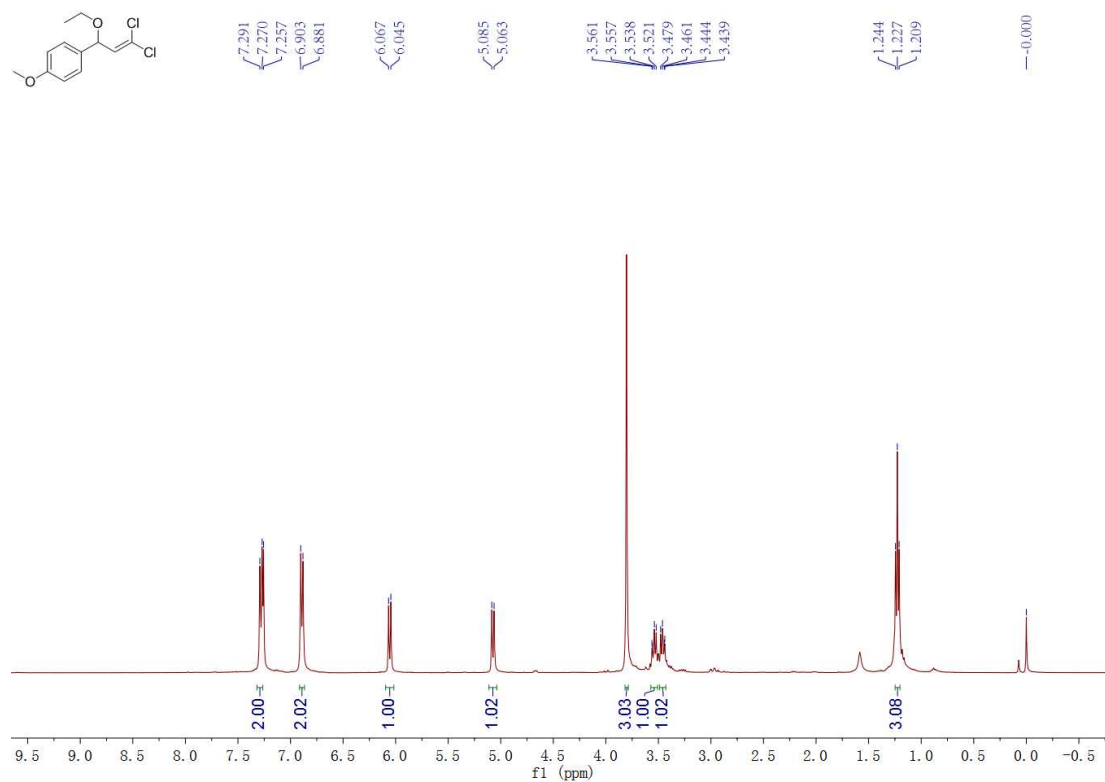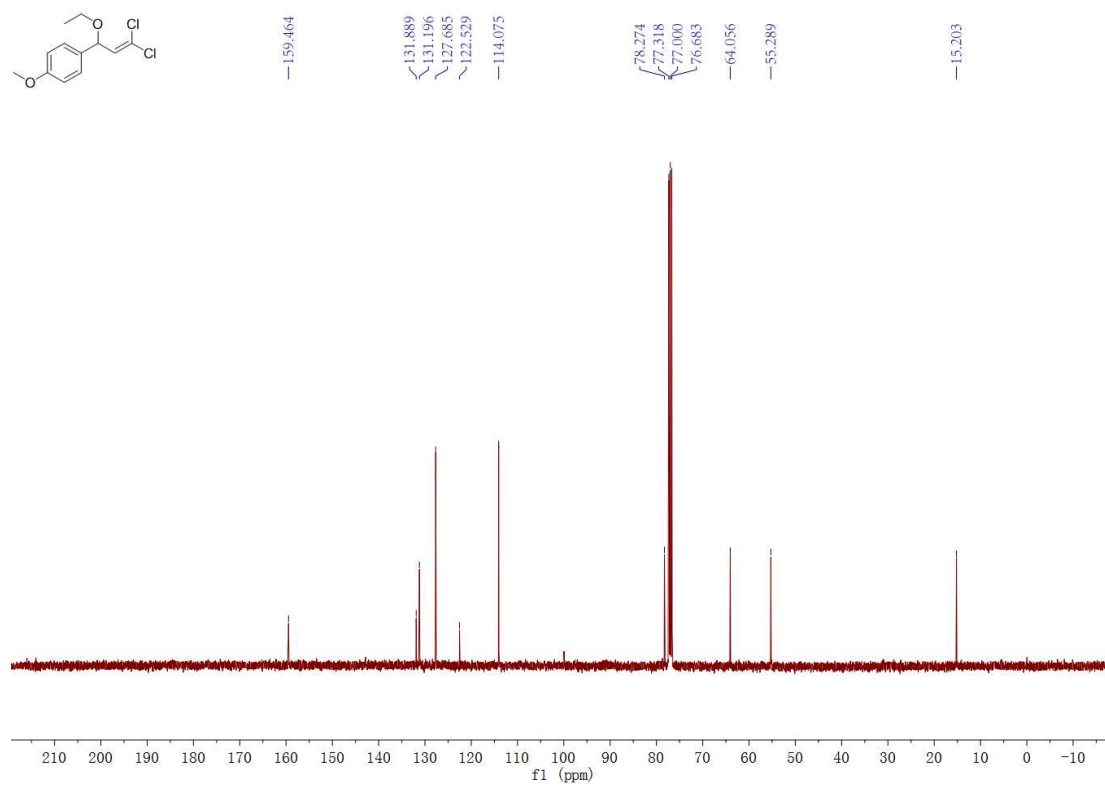

## (F) References

1. Z.-F. Xu, H. Dai, L. Shan, C.-Y. Li, *Org. Lett.* **2018**, *20*, 1054.
2. C. H. Oh, H. H. Jung, K. S. Kim, N. Kim, *Angew. Chem.* **2003**, *115*, 829; *Angew. Chem. Int. Ed.* **2003**, *42*, 805.
3. A. Jana, K. Misztal, A. Żak, K. Grela, *J. Org. Chem.* **2017**, *82*, 4226.
4. X. Wang, X. Qiao, X. Yin, Z. Cui, P. Fu, M. Liu, G. Wang, X. Pan, X. Pang, *Chem Asian J.* **2020**, *15*, 1014.
5. Gaussian **09**, Revision **A.01**, M. J. Frisch, G. W. Trucks, H. B. Schlegel, G. E. Scuseria, M. A. Robb, J. R. Cheeseman, G. Scalmani, V. Barone, B. Mennucci, G. A. Petersson, H. Nakatsuji, M. Caricato, X. Li, H. P. Hratchian, A. F. Izmaylov, J. Bloino, G. Zheng, J. L. Sonnenberg, M. Hada, M. Ehara, K. Toyota, R. Fukuda, J. Hasegawa, M. Ishida, T. Nakajima, Y. Honda, O. Kitao, H. Nakai, T. Vreven, J. A. Montgomery, Jr., J. E. Peralta, F. Ogliaro, M. Bearpark, J. J. Heyd, E. Brothers, K. N. Kudin, V. N. Staroverov, R. Kobayashi, J. Normand, K. Raghavachari, A. Rendell, J. C. Burant, S. S. Iyengar, J. Tomasi, M. Cossi, N. Rega, J. M. Millam, M. Klene, J. E. Knox, J. B. Cross, V. Bakken, C. Adamo, J. Jaramillo, R. Gomperts, R. E. Stratmann, O. Yazyev, A. J. Austin, R. Cammi, C. Pomelli, J. W. Ochterski, R. L. Martin, K. Morokuma, V. G. Zakrzewski, G. A. Voth, P. Salvador, J. J. Dannenberg, S. Dapprich, A. D. Daniels, O. Farkas, J. B. Foresman, J. V. Ortiz, J. Cioslowski, and D. J. Fox, Gaussian, Inc., Wallingford CT, **2009**.
6. Y. Zhao, D. G. Truhlar, *Theor. Chem. Acc.* **2008**, *120*, 215.
7. V. A. Rassolov, M. A. Ratner, J. A. Pople, P. C. Redfern, L.A. J. Curtiss, *Comp. Chem.* **2001**, *22*, 976.
8. Marenich, A. V.; Cramer, C. J.; Truhlar, D. G. *J. Phys. Chem. B*, **2009**, *113*, 6378.
9. B. Lakshminarayana, L. Mahendar, P. Ghosal, B. Sreedhar, G. Satyanarayana, Ch. Subrahmanyam, *New J. Chem.* **2018**, *42*, 1646.
10. D. B. Eremin, E. A. Denisova, A. Yu. Kostyukovich, J. Martens, G. Berden, J. Oomens, V. N. Khrustalev, V. M. Chernyshev, V. P. Ananikov, *Chem. Eur. J.* **2019**, *25*, 16564.
11. R. Imashiro, M. Seki, *J. Org. Chem.* **2004**, *69*, 4216.

12. Q. Zhao, J.-K. Jin, J. Wang, F.-L. Zhang, Y.-F. Wang, *Chem. Sci.* **2020**, *11*, 3909.
13. S. Puri, M. H. Babua, M. S. Reddy, *Org. Biomol. Chem.* 2016, *14*, 7001.
14. E. Korytiakova', N. O. Thiel, F. Pape, J. F. Teichert, *Chem. Commun.* **2017**, *53*, 732.
15. W. C. Shearouse, C. M. Korte, J. Mack, *Green Chem.* **2011**, *13*, 598.
16. Y. Bao, G.-Y. Wang, Y.-X. Zhang, K.-J. Bian and X.-S. Wang, *Chem. Sci.* **2018**, *9*, 2986
